# Supplementary material
Source: PubMed Central journal article supplement (PMC6715302)
Supplement: NIHMS1019644-supplement-Supp_info.pdf [file NIHMS1019644-supplement-Supp_info.pdf]

# Total Synthesis of (–)-Salinosporamide A via a Late Stage C-H Insertion

Hadi Gholami, Aman Kulshrestha, Olivia K. Favor, Richard J. Staples, and Babak Borhan\*

Department of Chemistry, Michigan State University, East Lansing, Michigan 48824, United States

[\\*babak@chemistry.msu.edu](mailto:babak@chemistry.msu.edu)

## Supporting Information

### Table of contents

|                                                                                                    |      |
|----------------------------------------------------------------------------------------------------|------|
| General remarks .....                                                                              | S2   |
| Optimization of the C-H insertion reaction at the C-5 center.....                                  | S3   |
| Cleavage of the olefin to reveal the C5 carbonyl; Optimization studies .....                       | S4   |
| Selective deprotection of the TBS ether in the presence of Boc protecting group on <b>26</b> ..... | S5   |
| Synthetic procedures for the total synthesis of (–)-salinosporamide A.....                         | S6   |
| Crystallographic analysis .....                                                                    | S36  |
| NMR spectra.....                                                                                   | S94  |
| References .....                                                                                   | S120 |

## General remarks

Molecular sieves (4Å) were dried at 160 °C under 0.25 mtorr pressure prior to use. Unless otherwise mentioned, solvents were purified as follows. Toluene and CH<sub>2</sub>Cl<sub>2</sub> were dried over CaH<sub>2</sub> whereas THF and Et<sub>2</sub>O were dried over sodium (dryness was monitored by color of benzophenone ketyl radical); they were freshly distilled prior to use. NMR spectra were obtained using 500 MHz Varian NMR spectrometers and referenced using the residual <sup>1</sup>H peak from the deuterated solvent. Waters 2795 (Alliance HT) instrument was used for HRMS analysis with polyethylene glycol (PEG-400-600) as a reference. Optical rotations were measured using a Jasco P-2000 polarimeter. Column chromatography was performed using Silicycle 60Å, 35-75 μm silica gel. Pre-coated 0.25 mm thick silica gel 60 F254 plates were used for analytical TLC and visualized using UV light, iodine, potassium permanganate stain, *p*-anisaldehyde stain or phosphomolybdic acid in EtOH stain. Enantiomeric excess determination of the chiral samples was performed using Agilent HPLC instruments (model 1260 or 1100).

**Table S1:** Optimization of the C-H insertion reaction at the C5 center.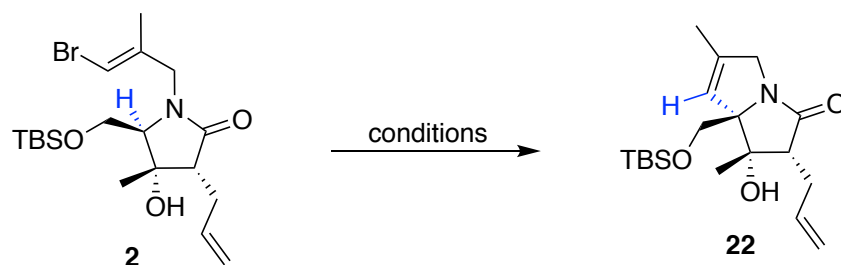

| entry <sup>a</sup>    | solvent        | KHMDS (equiv) <sup>b</sup> | temp. (°C) <sup>c</sup> | time (h)   | conversion (%) <sup>d</sup> | yield (%) <b>22/2</b> |
|-----------------------|----------------|----------------------------|-------------------------|------------|-----------------------------|-----------------------|
| 1                     | THF            | 3.0                        | -40 to 4                | 12         | 40                          | 25/53                 |
| 2 <sup>f</sup>        | THF            | 6.0                        | -40 to rt               | 12         | 100                         | 25/-                  |
| 3                     | THF            | 5.0                        | -40 to rt               | 12         | 100                         | 30/-                  |
| 4                     | THF            | 2.0                        | -78 to -30              | 14         | 0                           | -/90                  |
| 5 <sup>g</sup>        | THF            | 5.0                        | -78 to rt               | 6          | 0                           | -/85                  |
| 6                     | toluene        | 3.0                        | -78 to 0                | 12         | 60                          | 27/30                 |
| 7 <sup>h</sup>        | toluene        | 3.0                        | -78 to 0                | 12         | 10                          | -/80                  |
| 8                     | toluene        | 3.0                        | -40 to 0                | 12         | 100                         | 33/-                  |
| 9                     | toluene        | 2.0                        | -78 to 0                | 20         | 25                          | 14/74                 |
| 10                    | toluene        | 5.0                        | -40 to 0                | 4          | 100                         | 43/-                  |
| 11 <sup>i</sup>       | toluene        | 5.0                        | -40 to 0                | 6          | 80                          | 10/36                 |
| 12                    | toluene        | 5.0                        | 0 to rt                 | 6          | 90                          | 15/9                  |
| 13                    | toluene        | 3.0                        | -78                     | 15         | 85                          | 53/13                 |
| 14                    | toluene        | 3.0                        | -40 to -20              | 12         | 70                          | 60/17                 |
| 15                    | toluene        | 3.0                        | -40 to -20              | 3.5        | 87                          | 58/14                 |
| <b>16</b>             | <b>toluene</b> | <b>5.0</b>                 | <b>-40 to -20</b>       | <b>3.5</b> | <b>90</b>                   | <b>75/10</b>          |
| 17                    | toluene        | 6.0                        | -40 to -20              | 3.5        | 90                          | 71/10                 |
| 18                    | toluene        | 3.0                        | -40 to -20              | 12         | 70                          | 51/20                 |
| 19                    | toluene        | 3.0                        | -40 to -20              | 1          | 75                          | 50/25 <sup>i</sup>    |
| 20                    | toluene        | 3.0                        | -40 to -20              | 2          | 80                          | 53/30 <sup>i</sup>    |
| <b>21<sup>k</sup></b> | <b>toluene</b> | <b>5.0</b>                 | <b>-40 to -20</b>       | <b>3.5</b> | <b>90</b>                   | <b>75/10</b>          |

<sup>a</sup>Reactions were performed on a 0.1 mmol scale. <sup>b</sup>KHMDS (0.5 M in toluene) was used. <sup>c</sup>The base was added at the first temperature and the reaction was stirred at the second temperature. <sup>d</sup>Conversions are estimated from <sup>1</sup>H-NMR using triphenylmethane as an internal standard. <sup>e</sup>Isolated yield unless otherwise noted. <sup>f</sup>KHMDS was added in two portions with 6 h interval. <sup>g</sup>KHMDS (0.5 M in THF) was used. <sup>h</sup>LiHMDS (1.0 M in hexane) was used. <sup>i</sup>KHMDS was added over 45 min at -40 °C. <sup>j</sup>Yields are estimated from <sup>1</sup>H-NMR using triphenylmethane as internal standard. <sup>k</sup>Reaction was performed on a 1 mmol scale.

**Table S2:** Cleavage of the olefin to reveal the C5 carbonyl; Optimization studies.

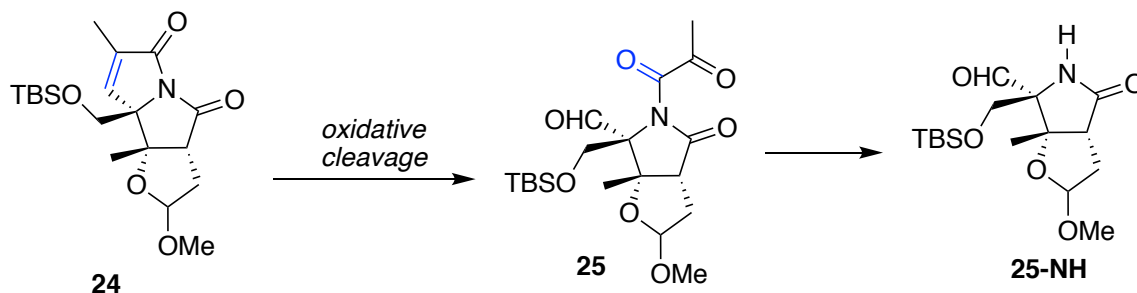

| entry | conditions                                                                                          | results (notes)                                                              |
|-------|-----------------------------------------------------------------------------------------------------|------------------------------------------------------------------------------|
| 1     | KMnO <sub>4</sub> , 18-crown-6 then NaIO <sub>4</sub> , LiOH                                        | complex mixture of products                                                  |
| 2     | OsO <sub>4</sub> , Oxone, DMF, r.t.                                                                 | <b>24</b> was recovered (>98%)                                               |
| 3     | OsO <sub>4</sub> , Oxone, DMF, 65 °C                                                                | <b>24</b> was recovered (>98%)                                               |
| 4     | RuCl <sub>3</sub> , NaClO <sub>4</sub>                                                              | <b>24</b> was recovered (>98%)                                               |
| 5     | RuO <sub>2</sub> , NaIO <sub>4</sub> , EtOH/H <sub>2</sub> O/TFA, r.t.                              | <b>24</b> was recovered (>98%)                                               |
| 6     | O <sub>3</sub> , DCM, -78 °C, 30 min                                                                | <b>24</b> was recovered (>98%)                                               |
| 7     | O <sub>3</sub> , acetone/H <sub>2</sub> O (95:5), 0 °C                                              | complex mixture of products                                                  |
| 8     | O <sub>3</sub> , DCM, -78 °C, 90 min then DMS*                                                      | 40% conv. ( <b>25</b> : <b>25-NH</b> ~3:1) basic workup                      |
| 9     | O <sub>3</sub> , DCM, -78 °C, 3-5 h then DMS*                                                       | >90% conv. (isolated yield <b>25</b> : 85%, <b>25-NH</b> : 8%) acidic workup |
| 10    | O <sub>3</sub> , MeOH, NaHCO <sub>3</sub> , -78 °C, 3-5 h then Ac <sub>2</sub> O, Et <sub>3</sub> N | Complex mixture of products                                                  |

\*DMS: Dimethyl sulfide.

**Table S3:** Selective deprotection of the TBS ether in the presence of Boc protecting group on **26**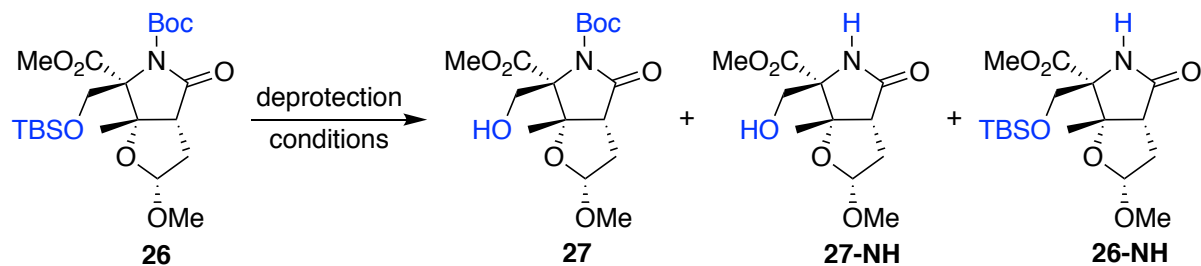

| entry | solvent                                         | reagent                                  | conditions      | results (notes) <sup>a</sup>                        |
|-------|-------------------------------------------------|------------------------------------------|-----------------|-----------------------------------------------------|
| 1     | MeOH                                            | CSA (1.1 equiv)                          | 0 °C, 3 h       | <b>26</b> was recovered (>98%)                      |
| 2     | THF                                             | HCl (2N)                                 | 0 °C to rt, 3 h | <b>26</b> was recovered (>98%)                      |
| 3     | MeOH                                            | PTSA (1.1 equiv)                         | rt, 3 h         | <b>27-NH</b> was the major product (>80%)           |
| 4     | MeOH                                            | PTSA (1.1 equiv)                         | 0 °C            | ~20 % conversion, <b>26-NH</b> as the major product |
| 5     | THF                                             | HF•Pyr                                   | 0 °C to rt, 3 h | complex mixture of products                         |
| 6     | MeOH                                            | AcCl                                     | 4 °C, 12 h      | ~30% conversion, <b>27-NH</b> as the major product  |
| 7     | AcOH:THF:H <sub>2</sub> O (3:1:1)               |                                          | 0 °C            | <b>26</b> was recovered (>98%)                      |
| 8     | AcOH:THF:H <sub>2</sub> O (3:1:1)               |                                          | 45 °C, 12 h     | <b>26</b> was recovered (>98%)                      |
| 9     | HCO <sub>2</sub> H:THF:H <sub>2</sub> O (3:6:1) |                                          | rt              | <b>26</b> was recovered (>98%)                      |
| 10    | DCM                                             | BF <sub>3</sub> •Et <sub>2</sub> O       | rt              | <b>27-NH</b> and <b>26-NH</b> (~2:1) as products    |
| 11    | THF                                             | TBAF (5.0 equiv)                         | 0 °C to rt, 5 h | complex mixture of products                         |
| 12    | MeOH                                            | CCl <sub>4</sub> , ultra-sonication      | 40 °C, 2 h      | <b>26</b> was recovered (>98%)                      |
| 13    | MeOH                                            | PPTS (1.1 equiv)                         | rt, 2 h         | <b>26</b> was recovered (>98%)                      |
| 14    | MeOH                                            | H <sub>2</sub> SO <sub>4</sub> (con.) 1% | 0 °C to rt, 2 h | <b>26</b> was recovered (>98%)                      |
| 15    | ACN                                             | HF (aq.)                                 | 0 °C to rt, 3 h | ~ 50% conv., <b>26-NH</b> as the major product      |
| 16    | EtOH                                            | HCl (con.) 1%                            | 0 °C to rt, 3 h | <b>26</b> was recovered (>98%)                      |
| 17    | DCM                                             | Quinolinium fluorochromate               | rt, 5 h         | <b>26</b> was recovered (>98%)                      |
| 18    | THF                                             | TBAF (5.0 equiv), CSA (5.0 equiv)        | 0 °C to rt, 3 h | ~ 20% conv., <b>27</b> as major product             |
| 19    | THF                                             | TBAF (2.5 equiv), AcOH (7.5 equiv)       | rt, 72 h        | ~75% con., 60% <b>27</b> was isolated               |
| 20    | THF                                             | TBAF (5.0 equiv), AcOH (10.0 equiv)      | 45 °C, 48 h     | >95% con., 85% <b>27</b> was isolated               |

[a] Unless otherwise stated, yield and the ratio of products were estimated based on <sup>1</sup>H-NMR analysis of the crude mixture using triphenylmethane as internal standard.

## Synthetic procedures for the total synthesis of (–)-salinosporamide A

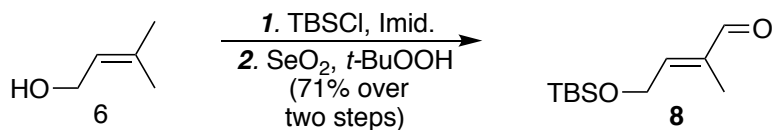

**Synthesis of aldehyde 8:** Commercially available 3-methyl-2-butenol **6** (12.0 g, 139 mmol) was dissolved in DMF (70 mL). To this solution imidazole (23.7 g, 348 mmol) and TBSCl (23.1 g, 153 mmol) were added at 0 °C. The mixture was stirred at room temperature for 5 h before it was quenched by addition of water (100 mL). The aqueous layer was extracted with ethyl acetate (3 x 100 mL). Combined organic layers were washed with brine (100 mL) and dried over sodium sulfate. Volatiles were removed under vacuum and the residue was used in the following step without purification.

SeO<sub>2</sub> (9.0 g, 82 mmol, 1.0 equiv) was dissolved in DCM (200 mL) at room temperature. To this mixture, *t*-BuOOH (70 wt.% in water, 30.0 mL, 217 mmol) was added dropwise at 0 °C. The reaction was stirred at this temperature for 30 min. To this mixture at 0 °C was added the crude TBS protected alcohol from **6** in DCM (100 mL) dropwise. The reaction mixture was stirred at room temperature for 15 h before it was quenched by addition of water (50 mL). The organic layer was separated and the aqueous layer was extracted with DCM (3 x 100 mL). The combined organic extract was washed with 10% KOH (4 x 50 mL), sat. NaHCO<sub>3</sub> (1 X 100 mL) and water (1 x 50 mL). The organic solvent was evaporated under reduced pressure. Crude aldehyde was purified on column chromatography (silica, ethyl acetate/hexane = 5%) to yield the pure aldehyde **8** as a light yellow oil (15.2 g, 71.0 mmol, 71% yield).

$^1\text{H-NMR}$  (500 MHz,  $\text{CDCl}_3$ )  $\delta$  9.40 (s, 1H), 6.50 (m, 1H), 4.48 (dq,  $J = 5.3, 1.2$  Hz, 2H), 1.71 (q,  $J = 1.3$  Hz, 3H), 0.90 (s, 9H), 0.08 (s, 6H).

$^{13}\text{C-NMR}$  (125 MHz,  $\text{CDCl}_3$ )  $\delta$  194.6, 153.2, 137.7, 60.5, 25.8, 18.3, 9.4, -5.3.

TOF MS  $\text{ES}^+$  ( $\text{C}_{11}\text{H}_{23}\text{O}_2\text{Si}$ ): Calc.  $[\text{M} + \text{H}]^+$ : 215.1467, Found  $[\text{M} + \text{H}]^+$ : 215.1463.

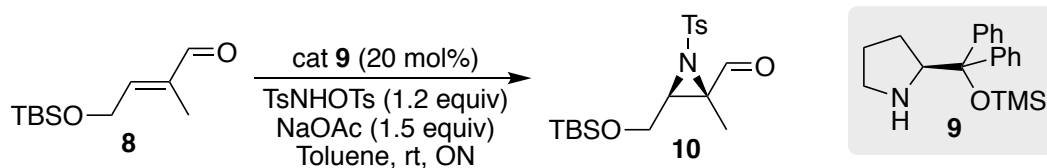

**Synthesis of Aziridine 10:**<sup>1</sup> To a stirred solution of aldehyde **8** (3.2 g, 15 mmol, 1.0 equiv) in toluene (30 mL), (*S*)-(-)- $\alpha,\alpha$ -diphenyl-2-pyrrolidinemethanol trimethylsilyl ether **9** (1.0 g, 3.0 mmol, 0.2 equiv), 4-methyl-N-(tosyloxy)benzenesulfonamide (6.1 g, 18 mmol, 1.2 equiv) and NaOAc (1.8 g, 22 mmol, 1.5 equiv) were added at room temperature. The resulting mixture was vigorously stirred at room temperature for 12 h. After completion of the reaction, the insoluble salts were removed by filtration and the cake was washed with ethyl acetate. After removal of the volatiles the crude product was purified on silica column chromatography (ethyl acetate/hexane = 10%) yielding the aziridine product **10** as a light yellow oil (5.1 g, 13.3 mmol, 88%). The enantiomeric excess of **10** was determined by HPLC analysis in comparison with the racemic material (OJ-H column, hexanes/*i*-PrOH = 99/1, 0.5 mL/min, 250 nm);  $R_T$  (minor enantiomer) = 21.0 min,  $R_T$  (major enantiomer) = 25.0 min.

$ee = >98\%$

$[\alpha]_D^{23} = +31.0$  ( $c$  1.0,  $\text{CHCl}_3$ ).

$^1\text{H-NMR}$  (500 MHz,  $\text{CDCl}_3$ )  $\delta$  9.51 (s, 1H), 7.82 (d,  $J = 8.4$  Hz, 2H), 7.31 (d,  $J = 8.4$  Hz, 2H), 3.73 – 3.63 (m, 3H), 2.43 (s, 3H), 1.40 (s, 3H), 0.82 (s, 9H), -0.02 (s, 3H), -0.04 (s, 3H).

$^{13}\text{C-NMR}$  (125 MHz,  $\text{CDCl}_3$ )  $\delta$  194.5, 144.6, 136.2, 129.7, 127.5, 60.3, 56.8, 51.0, 25.7, 21.6, 18.2, 11.9, -5.5, -5.6.

TOF MS  $\text{ES}^+$  ( $\text{C}_{18}\text{H}_{30}\text{NO}_4\text{SSi}$ ): Calc.  $[\text{M} + \text{H}]^+$ : 384.1665, Found  $[\text{M} + \text{H}]^+$ : 384.1667.

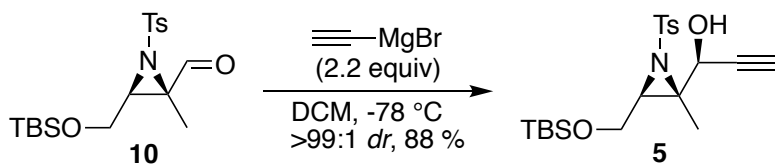

**Synthesis of aziridine alcohol 5:** To a solution of aldehyde **10** (5.0 g, 13 mmol, >98% *ee*) in dry DCM (100 mL) at  $-78$  °C, ethynylmagnesium bromide (0.5 M in THF, 2.1 equiv, 27 mmol, 55 mL) was added dropwise under argon. The reaction mixture was stirred at this temperature and the reaction progress was monitored by TLC. After 30 min, TLC indicated complete consumption of the starting material. The reaction was quenched by addition of sat. ammonium chloride (50 mL) at  $-78$  °C. The mixture was allowed to warm to room temperature. The organic layer was isolated and the aqueous layer was extracted with DCM (3 x 50 mL). The combined organic extract was washed with brine, dried over sodium sulfate, and concentrated under reduced pressure. The crude was purified by column chromatography (silica gel, ethyl acetate/hexane = 10%). Alcohol **5** was obtained as a white crystalline solid (4.7 g, 11.5 mmol, 88%, *dr* >99:1).

mp = 82–84 °C

$[\alpha]_{\text{D}}^{23} = -11.0$  ( $c$  1.0,  $\text{CHCl}_3$ ).



$^1\text{H-NMR}$  (500 MHz,  $\text{CDCl}_3$ )  $\delta$  7.81 (d,  $J = 8.4$  Hz, 2H), 7.29 (d,  $J = 8.4$  Hz, 2H), 4.85 (dd,  $J = 3.6, 2.3$  Hz, 1H), 3.67 (dd,  $J = 11.2, 5.3$  Hz, 1H), 3.60 – 3.50 (m, 2H), 3.22 (dd,  $J = 6.8, 5.3$  Hz, 1H), 2.50 (d,  $J = 2.3$  Hz, 1H), 2.41 (s, 3H), 1.52 (s, 3H), 0.81 (s, 9H), -0.04 (s, 3H), -0.06 (s, 3H).

$^{13}\text{C-NMR}$  (125 MHz,  $\text{CDCl}_3$ )  $\delta$  144.3, 137.1, 129.6, 127.3, 80.3, 74.4, 65.3, 60.4, 58.2, 50.9, 25.7, 21.6, 18.1, 12.9, -5.5, -5.6.

TOF MS  $\text{ES}^+$  ( $\text{C}_{20}\text{H}_{32}\text{NO}_4\text{SSi}$ ): Calc.  $[\text{M} + \text{H}]^+$ : 410.1821, Found  $[\text{M} + \text{H}]^+$ : 410.1819.

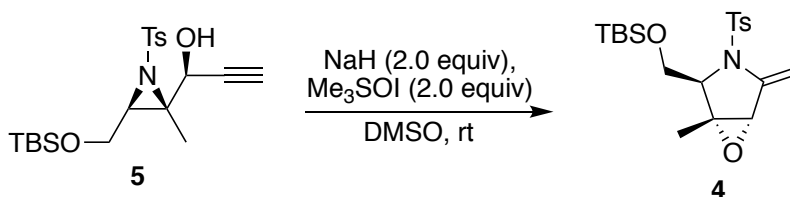

**Synthesis of enamide 4:** To trimethylsulfoxonium iodide ( $\text{Me}_3\text{SOI}$ , 9.5 g, 43 mmol, 2.0 equiv, dried under vacuum for 12 h) in dry DMSO (100 mL) was added sodium hydride (1.8 g, 43 mmol, 2.0 equiv, 60% in mineral oil) portion-wise at room temperature under argon. The reaction mixture was stirred under argon for 30 min. To this mixture was added alcohol **5** (8.8 g, 21 mmol) in dry DMSO (50 mL) drop-wise. The reaction was stirred for 12 h at room temperature before it was quenched with sat.  $\text{NH}_4\text{Cl}$  (100 mL). The aqueous layer was extracted with ethyl acetate (3 x 100 mL). The combined organic extract was washed with brine (100 mL), dried over sodium sulfate and concentrated under reduced pressure. Crude product was pure enough and utilized in the following step without further purification. An analytical sample of the crude was passed through a plug of silica (ethyl acetate/hexane = 20%) to give pure **4** as a white solid.



purification. An analytical sample of the crude was passed through a plug of silica (ethyl acetate/hexane = 10% to 20%) to afford pure **4** as a white solid.

mp = 109–111 °C

$[\alpha]_D^{23} = -62.0$  (*c* 1.0, CHCl<sub>3</sub>).

<sup>1</sup>H-NMR (500 MHz, CDCl<sub>3</sub>) δ 7.83 (d, *J* = 8.1 Hz, 2H), 7.29 (d, *J* = 8.0 Hz, 2H), 4.36 – 4.29 (m, 1H), 4.13 (dd, *J* = 11.5, 2.5 Hz, 1H), 3.88 (dt, *J* = 11.5, 1.2 Hz, 1H), 3.33 (s, 1H), 2.40 (s, 3H), 1.58 (s, 3H), 0.78 (s, 7H), 0.05 (s, 3H), -0.02 (s, 3H).

<sup>13</sup>C-NMR (125 MHz, CDCl<sub>3</sub>) δ 169.1, 145.1, 135.2, 129.6, 128.1, 64.5, 61.4, 59.4, 57.4, 25.5, 21.7, 17.8, 13.5, -5.8, -5.9.

TOF MS ES<sup>+</sup> (C<sub>19</sub>H<sub>30</sub>NO<sub>5</sub>SSi): Calc. [M + H]<sup>+</sup>: 412.1614, Found [M + H]<sup>+</sup>: 412.1624.

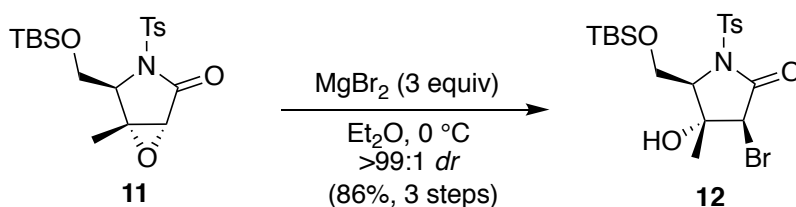

**Synthesis of bromo alcohol 12:** To the crude epoxide **11** from the above reaction (dried under vacuum overnight) under argon was added dry diethyl ether (300 mL) and the reaction flask was placed at 0 °C. Anhydrous MgBr<sub>2</sub> (dried overnight under vacuum, 3.0 equiv, 17 g) was added to the reaction in portions. The mixture was stirred at this temperature for 3 h, after which TLC showed complete consumption of the epoxide **11**. The reaction was quenched by very slow addition of saturated ammonium chloride (100 mL) at 0 °C. The organic layer was separated and the aqueous layer was extracted with ethyl acetate (3 x 100 mL). The combined organic extract was washed with water and

brine, then dried over sodium sulfate. Volatiles were evaporated and the crude product was purified with column chromatography (silica gel, ethyl acetate/hexane = 10% to 20%).

Pure product **14** was isolated as a white solid (9.0 g, 18 mmol, 86% yield over 3 steps).

mp = 143–145 °C

$[\alpha]_D^{23} = +31.0$  (*c* 1.0, CHCl<sub>3</sub>).

<sup>1</sup>H-NMR (500 MHz, CDCl<sub>3</sub>) δ 7.90 (d, *J* = 8.3 Hz, 1H), 7.31 (d, *J* = 8.1 Hz, 1H), 4.20 – 4.11 (m, 1H), 3.96 (s, 0H), 2.41 (s, 1H), 1.61 (s, 1H), 0.90 (s, 3H), 0.13 (s, 1H), 0.10 (s, 1H).

<sup>13</sup>C-NMR (125 MHz, CDCl<sub>3</sub>) δ 169.1, 145.1, 135.2, 129.6, 128.1, 64.5, 61.4, 59.4, 57.4, 25.5, 21.7, 17.8, 13.5, -5.8, -5.9.

TOF MS ES<sup>+</sup> (C<sub>19</sub>H<sub>31</sub>BrNO<sub>5</sub>SSi): Calc. [M + H]<sup>+</sup>: 492.0876, Found [M + H]<sup>+</sup>: 492.0872.

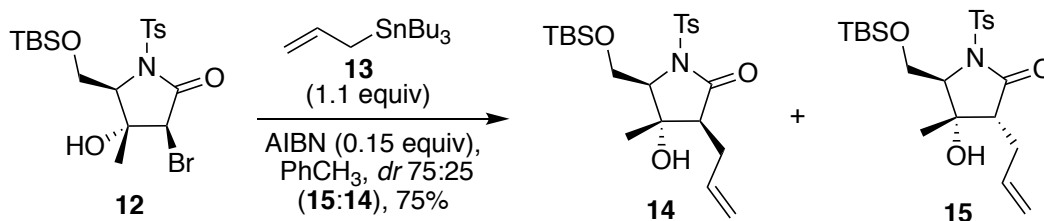

**Synthesis of 14 and 15:** Bromo pyrrolidinone **12** (5.5 g, 11 mmol, 1.0 equiv) was dissolved in toluene (100 mL). The solution was degassed for 10 min at 100 °C under argon. AIBN (0.15 mmol, 1.65 mmol, 270 mg) was added to this mixture followed by addition of allyltributyl stannane (1.1 equiv, 12 mmol, 4.0 mL). The reaction mixture was heated to reflux for 3 h (TLC confirmed completion of the reaction). The solvent was removed through a short path distillation apparatus (in a well ventilated hood) and the crude was purified via column chromatography (ethyl acetate/hexanes = 10 to 20%)

yielding an inseparable mixture of diastereomers as a 1:3 ratio of **14** and **15** (3.8 g, 8.3 mmol, 75% combined yield). The diastereomeric mixture was utilized in the following steps.

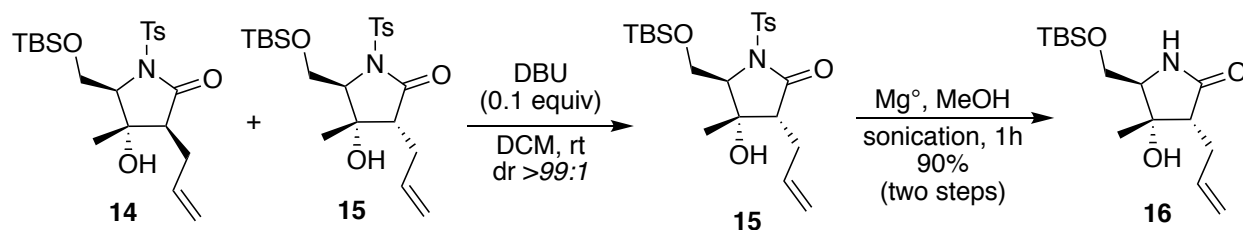

The diastereomeric mixture of **14** and **15** (5.9 g, 13 mmol) was dissolved in dry DCM (150 mL) at room temperature and DBU (0.20 mL, 1.3 mmol, 0.10 equiv) was added. The reaction was stirred at room temperature for 5 h. The solvent was evaporated and the residue was used in the following step without further purification. An analytical sample of the crude was passed through a plug of silica (ethyl acetate/hexane = 20%) to give pure diastereomer **15** as a white solid.

mp = 128–130 °C

$[\alpha]_{\text{D}}^{23} = -16.0$  (*c* 1.0, CHCl<sub>3</sub>).

<sup>1</sup>H-NMR (500 MHz, CDCl<sub>3</sub>) δ 7.93 – 7.88 (m, 2H), 7.28 (d, *J* = 8.1 Hz, 2H), 5.88 – 5.76 (m, 1H), 5.07 (dp, *J* = 16.9, 1.5 Hz, 1H), 5.00 (dq, *J* = 10.1, 1.3 Hz, 1H), 4.10 (ddd, *J* = 11.7, 2.9, 1.0 Hz, 1H), 4.00 (dd, *J* = 2.9, 1.5 Hz, 1H), 3.89 (dt, *J* = 11.7, 1.3 Hz, 1H), 2.84 (ddd, *J* = 6.8, 5.7, 1.0 Hz, 1H), 2.48 – 2.41 (m, 1H), 2.40 (s, 3H), 2.21 (dtd, *J* = 15.2, 8.2, 1.2 Hz, 1H), 1.62 (br, 1H), 1.45 (d, *J* = 1.1 Hz, 3H), 0.79 (d, *J* = 1.1 Hz, 9H), 0.06 (d, *J* = 1.0 Hz, 3H), 0.01 (d, *J* = 1.0 Hz, 3H).

$^{13}\text{C}$ -NMR (125 MHz,  $\text{CDCl}_3$ )  $\delta$  174.0, 144.7, 136.6, 135.9, 129.5, 128.1, 116.7, 77.1, 70.7, 62.1, 52.1, 28.0, 25.7, 22.4, 21.7, 17.9, -5.7, -5.9.

TOF MS  $\text{ES}^+$  ( $\text{C}_{22}\text{H}_{36}\text{NO}_5\text{SSi}$ ): Calc.  $[\text{M} + \text{H}]^+$ : 454.2083, Found  $[\text{M} + \text{H}]^+$ : 454.2087.

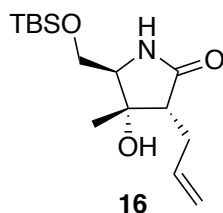

**Synthesis of amide 16:** To the crude lactam **15** (5.8 g) in methanol (100 mL) was added magnesium powder (5.0 equiv, 1.6 g, 65 mmol). The solution was sonicated in an ultrasonic bath at room temperature for 1 h to afford the detosylated compound **16** (3.50 g, 11.7 mmol, 90% over two steps) as a white solid.

mp = 102–104 °C

$[\alpha]_{\text{D}}^{23} = +65.0$  ( $c$  1.0,  $\text{CHCl}_3$ ).

$^1\text{H}$ -NMR (500 MHz,  $\text{CDCl}_3$ )  $\delta$  6.04 – 5.90 (m, 1H), 5.80 (br, 1H), 5.22 – 5.11 (d,  $J = 17.5$  Hz, 1H), 5.09 – 5.03 (d,  $J = 11.5$  Hz, 1H), 3.63 (dd,  $J = 10.6, 3.8$  Hz, 1H), 3.59 (dd,  $J = 10.6, 5.4$  Hz, 1H), 3.38 (ddd,  $J = 5.1, 3.8, 1.2$  Hz, 1H), 2.57 (dddd,  $J = 11.8, 9.5, 7.9, 4.4$  Hz, 1H), 2.47 – 2.35 (m, 2H), 1.37 (s, 3H), 0.86 (s, 10H), 0.03 (s, 3H), 0.03 (s, 3H).

$^{13}\text{C}$ -NMR (125 MHz,  $\text{CDCl}_3$ )  $\delta$  177.3, 137.3, 116.5, 77.6, 65.0, 62.8, 50.8, 28.8, 25.8, 23.1, 18.1, -5.57, -5.63.

TOF MS  $\text{ES}^+$  ( $\text{C}_{15}\text{H}_{30}\text{NO}_3\text{Si}$ ): Calc.  $[\text{M} + \text{H}]^+$ : 300.1995, Found  $[\text{M} + \text{H}]^+$ : 300.1999.

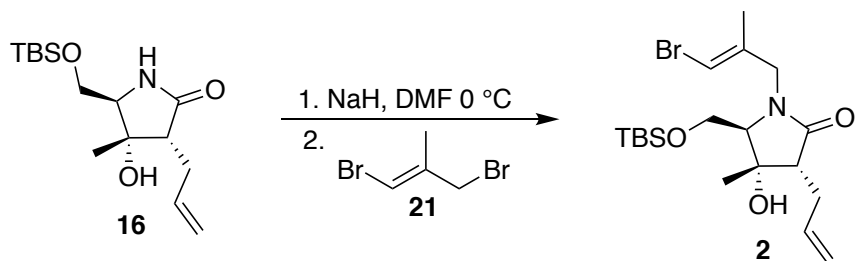

**Synthesis of vinyl bromide 2:** To a solution of lactam **16** (2.4 g, 8.0 mmol, 1.0 equiv) in dry DMF (50 mL) at 0 °C was added sodium hydride (0.68 g, 17 mmol, 2.1 equiv). The reaction mixture was stirred at this temperature for 30 min before a solution of allyl bromide **21**<sup>2</sup> (1.79 g, 8.40 mmol, 1.05 equiv) in dry DMF (10 mL) was added dropwise. The reaction was stirred at 0 °C for 2 h, quenched by the addition of saturated NH<sub>4</sub>Cl (50 mL) and the aqueous layer was extracted with ethyl acetate (3 x 10 mL). The combined organic extract was washed with brine (50 mL), dried over sodium sulfate and concentrated under reduced pressure. The crude product was purified by column chromatography (ethyl acetate/hexane = 20%), yielding pure product **2** as an off white solid (2.9 g, 85%).

mp = 64–66 °C

$[\alpha]_{\text{D}}^{23} = +59.0$  (*c* 1.0, CHCl<sub>3</sub>).

<sup>1</sup>H-NMR (500 MHz, CDCl<sub>3</sub>) δ 6.12 (q, *J* = 1.3 Hz, 1H), 5.96 (dddd, *J* = 17.1, 10.0, 8.5, 5.5 Hz, 1H), 5.15 (dq, *J* = 17.1, 1.7 Hz, 1H), 5.04 (dtd, *J* = 10.1, 1.8, 0.8 Hz, 1H), 4.45 – 4.38 (m, 1H), 3.73 – 3.63 (m, 2H), 3.42 (dt, *J* = 15.2, 1.0 Hz, 1H), 3.14 (t, *J* = 2.7 Hz, 1H), 2.63 (dddd, *J* = 14.7, 7.2, 3.6, 1.8 Hz, 1H), 2.59 – 2.54 (m, 1H), 2.41 – 2.31 (m, 1H), 1.76 – 1.73 (m, 3H), 1.62 (br, 1H), 1.43 (s, 3H), 0.84 (s, 9H), 0.02 (s, 3H), 0.01 (s, 3H).

$^{13}\text{C}$ -NMR (125 MHz,  $\text{CDCl}_3$ )  $\delta$  174.7, 137.7, 137.3, 116.3, 104.7, 76.7, 67.9, 59.1, 50.9, 46.3, 29.0, 25.7, 23.3, 18.0, 17.3, -5.6, -5.6.

TOF MS  $\text{ES}^+$  ( $\text{C}_{19}\text{H}_{35}\text{BrNO}_3\text{Si}$ ): Calc.  $[\text{M} + \text{H}]^+$ : 432.1570, Found  $[\text{M} + \text{H}]^+$ : 432.1574.

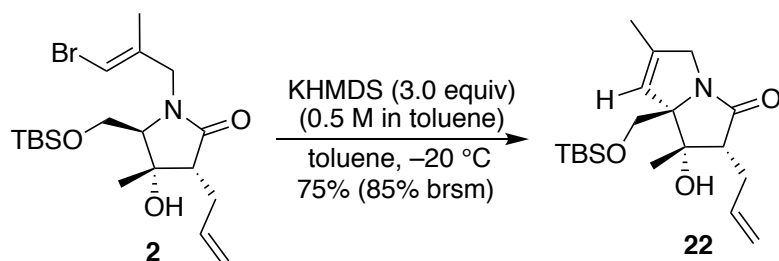

**Synthesis of bicyclic 22:** To a solution of vinyl bromide **2** (0.43 g, 1.0 mmol, 1.0 equiv) in dry toluene (20 mL) at 40 °C was added KHMDS (0.5 M in toluene, 10 mL, 5.0 mmol, 5.0 equiv) dropwise. The reaction mixture was cooled to -20 °C and was stirred at this temperature for 3.5 h. The reaction was then quenched at this temperature with sat.  $\text{NH}_4\text{Cl}$  (20 mL). The reaction mixture was brought to room temperature and the organic layer was separated. The aqueous layer was extracted with ethyl acetate (3 x 20 mL). The combined organic layers were washed with brine (20 mL), dried over sodium sulfate and concentrated under reduced pressure. The crude product was purified on column chromatography (ethyl acetate/hexane = 20% to 40%). Pure product **22** was isolated as a light yellow oil (263 mg, 0.75 mmol, 75% yield). The remaining vinyl bromide **2** was eluted from the column as the second fraction (41 mg, 0.1 mmol).

$[\alpha]_{\text{D}}^{23} = +76.0$  ( $c$  1.0,  $\text{CHCl}_3$ ).

$^1\text{H}$ -NMR (500 MHz,  $\text{CDCl}_3$ )  $\delta$  5.97 (ddd,  $J = 24.2, 9.4, 5.6$  Hz, 1H), 5.33 (s, 1H), 5.14 – 5.06 (m, 1H), 4.99 (d,  $J = 10.1$  Hz, 1H), 4.27 (d,  $J = 15.5$  Hz, 1H), 3.70 (d,  $J = 10.7$  Hz,



1H), 3.66 – 3.59 (m, 1H), 3.49 (d, J = 10.7 Hz, 1H), 2.94 (t, J = 6.7 Hz, 1H), 2.57 – 2.48 (m, 1H), 2.34 – 2.24 (m, 1H), 1.81 (d, J = 1.6 Hz, 3H), 1.43 (s, 3H), 1.42 (br, 1H), 0.85 (d, J = 0.9 Hz, 9H), 0.01 (s, 3H), 0.00 (s, 3H).

<sup>13</sup>C-NMR (125 MHz, CDCl<sub>3</sub>) δ 177.7, 142.5, 137.9, 120.3, 115.6, 83.3, 80.8, 65.2, 53.4, 53.3, 27.5, 25.7, 21.4, 18.1, 14.7, -5.6, -5.7.

TOF MS ES<sup>+</sup> (C<sub>19</sub>H<sub>34</sub>NO<sub>3</sub>Si): Calc. [M + H]<sup>+</sup>: 352.2308, Found [M + H]<sup>+</sup>: 352.2325.

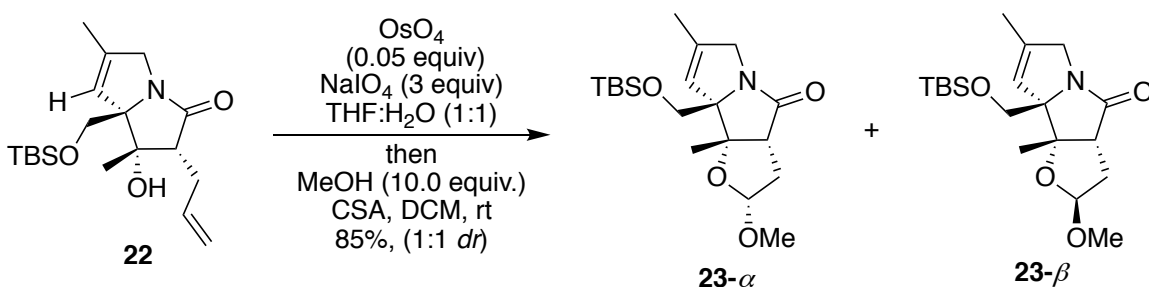

**Synthesis of 23:** To a solution of **22** (3.0 mmol, 1.0 g, 1.0 equiv) in THF:H<sub>2</sub>O (1:1, 60 mL) at room temperature was added OsO<sub>4</sub> (0.05 M solution in water, 3.0 mL, 0.15 mmol, 0.05 equiv). After 5 min, sodium periodate (1.9 g, 9.0 mmol, 3.0 equiv) was added to the reaction mixture (during which the reaction turns dark). The reaction mixture was stirred at room temperature for 1 h (reaction turns to a milky suspension), at which time TLC indicated complete consumption of starting material. The reaction was quenched by addition of saturated sodium thiosulfate (10 mL), transferred to a separatory funnel and extracted with ethyl acetate (4 x 20 mL). The organic layers were combined, washed with brine (20 mL), dried over sodium sulfate, and concentrated under reduced pressure. To the resulting diastereomeric hemiacetal mixture in DCM (150 mL) were added methanol (2.0 equiv, 6.0 mmol, 0.25 mL) and CSA (0.15 mmol, 35 mg, 0.05 equiv) at room

temperature. The reaction mixture was stirred at this temperature for 12 h after which the solvent was evaporated and the crude product was purified via column chromatography (silica, ethyl acetate/hexane = 20% to 40%). Two diastereomers were separated in a ~1:1 ratio with a combined yield of 85%.

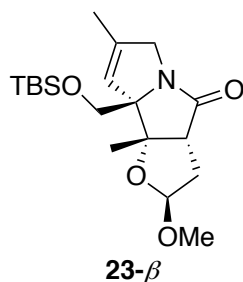

**Data for the less polar diastereomer; 23-β:** 450 mg, 1.22 mmol, 41% yield as a clear oil.

$[\alpha]_D^{23} = +48.0$  (*c* 1.0, CHCl<sub>3</sub>).

<sup>1</sup>H-NMR (500 MHz, CDCl<sub>3</sub>) δ 5.38 (q, *J* = 1.5 Hz, 1H), 4.90 (dd, *J* = 6.3, 3.9 Hz, 1H), 4.12 (d, *J* = 15.3 Hz, 1H), 3.70 (d, *J* = 10.8 Hz, 1H), 3.56 (ddt, *J* = 15.3, 2.5, 1.2 Hz, 1H), 3.36 (d, *J* = 10.8 Hz, 1H), 3.30 (s, 3H), 3.11 (d, *J* = 8.6 Hz, 1H), 2.71 (ddd, *J* = 14.0, 6.2, 1.2 Hz, 1H), 2.00 (ddd, *J* = 14.0, 8.6, 3.9 Hz, 1H), 1.77 (d, *J* = 1.5 Hz, 3H), 1.51 (s, 3H), 0.85 (s, 9H), 0.01 (s, 3H), -0.00 (s, 3H).

<sup>13</sup>C-NMR (125 MHz, CDCl<sub>3</sub>) δ 177.7, 138.6, 121.3, 105.2, 89.6, 82.2, 65.3, 55.5, 54.6, 52.8, 34.3, 25.8, 19.6, 18.2, 14.8, -5.5, -5.8.

TOF MS ES<sup>+</sup> (C<sub>19</sub>H<sub>34</sub>NO<sub>4</sub>Si): Calc. [M + H]<sup>+</sup>: 368.2257, Found [M + H]<sup>+</sup>: 368.2267.

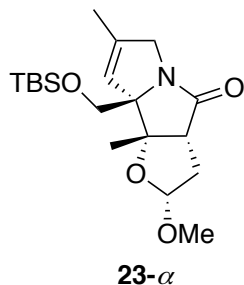

**Data for the more polar diastereomer 23- $\alpha$ :** 480 mg, 1.30 mmol, 44% yield as a clear oil.

$[\alpha]_D^{23} = -77.0$  (*c* 1.0, CHCl<sub>3</sub>).

<sup>1</sup>H-NMR (500 MHz, CDCl<sub>3</sub>)  $\delta$  5.47 (q, *J* = 1.8 Hz, 1H), 4.88 (d, *J* = 5.0 Hz, 1H), 4.09 – 4.04 (m, 1H), 3.70 (d, *J* = 10.7 Hz, 1H), 3.68 – 3.63 (m, 1H), 3.37 (d, *J* = 10.7 Hz, 1H), 3.10 (s, 3H), 2.92 (d, *J* = 8.0 Hz, 1H), 2.43 (d, *J* = 13.2 Hz, 1H), 2.07 (ddd, *J* = 13.2, 8.1, 5.0 Hz, 1H), 1.77 (d, *J* = 1.5 Hz, 3H), 1.44 (s, 3H), 0.84 (s, 9H), 0.01 (s, 3H), 0.00 (s, 3H).

<sup>13</sup>C-NMR (125 MHz, CDCl<sub>3</sub>)  $\delta$  177.2, 138.6, 122.4, 104.2, 90.7, 83.2, 65.5, 54.3, 53.8, 53.7, 34.7, 25.7, 20.9, 18.1, 14.5, -5.5, -5.8.

TOF MS ES<sup>+</sup> (C<sub>19</sub>H<sub>34</sub>NO<sub>4</sub>Si): Calc. [M + H]<sup>+</sup>: 368.2257, Found [M + H]<sup>+</sup>: 368.2267.

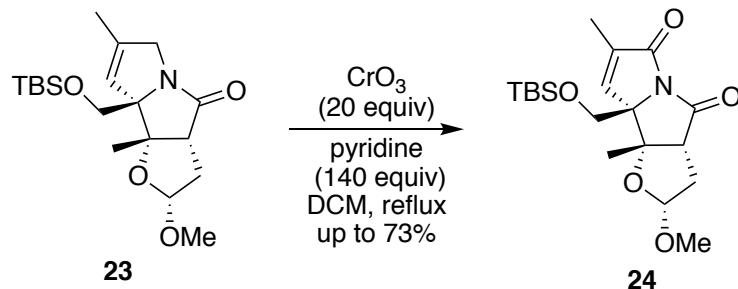

**Synthesis of enone 24:** To  $\text{CrO}_3$  (22 mmol, 2.2 g, 20 equiv) in dry DCM (30 mL) at 0 °C was added pyridine (154 mmol, 12.4 mL, 140 equiv) dropwise under argon.<sup>3</sup> The reaction mixture was stirred at this temperature for 10 min followed by stirring at room temperature for 30 min. To this mixture at 0 °C was added **23** (1.1 mmol, 0.40 g, 1.0 equiv) in DCM (30 mL) and the reaction was heated to reflux. After 24 h, the mixture was cooled to room temperature and volatiles were removed under pressure. The residue was re-dissolved in ethyl acetate (100 mL) and the precipitates were removed by filtration through a pad of celite. The product was purified via column chromatography (silica, ethyl acetate/hexane = 20%), yielding **24** as a white solid (305 mg, 0.8 mmol, 73%).

mp = 161–164 °C

$[\alpha]_{\text{D}}^{25} = -210.0$  ( $c$  1.0,  $\text{CHCl}_3$ ).

$^1\text{H-NMR}$  (500 MHz,  $\text{CDCl}_3$ )  $\delta$  6.78 (q,  $J = 1.7$  Hz, 1H), 4.87 (d,  $J = 4.8$  Hz, 1H), 3.92 (d,  $J = 10.5$  Hz, 1H), 3.39 (d,  $J = 10.5$  Hz, 1H), 3.12 (d,  $J = 8.1$  Hz, 1H), 3.05 (s, 2H), 2.46 (d,  $J = 13.2$  Hz, 1H), 2.16 (ddd,  $J = 13.2, 8.1, 4.8$  Hz, 1H), 1.89 (d,  $J = 1.7$  Hz, 4H), 1.47 (s, 3H), 0.85 (s, 7H), 0.03 (s, 3H), 0.03 (s, 3H).

$^{13}\text{C-NMR}$  (125 MHz,  $\text{CDCl}_3$ )  $\delta$  172.5, 168.7, 141.3, 136.1, 104.0, 88.7, 76.4, 66.8, 56.7, 54.7, 35.6, 25.8, 20.4, 18.1, 11.1, -5.6, -5.9.

TOF MS  $\text{ES}^+$  ( $\text{C}_{19}\text{H}_{32}\text{NO}_7\text{Si}$ ): Calc.  $[\text{M} + \text{H}]^+$ : 382.2050, Found  $[\text{M} + \text{H}]^+$ : 382.2060.

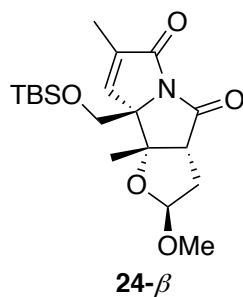

**24- $\beta$**  (282 mg, 0.74 mmol, 74% yield) was synthesized as an off white solid from **23- $\beta$**  (386 mg, 1.0 mmol), according to the procedure described above for the synthesis of **24**.

mp = 75–78 °C

$[\alpha]_D^{23} = -12.0$  (*c* 1.0, CHCl<sub>3</sub>).

<sup>1</sup>H-NMR (500 MHz, CDCl<sub>3</sub>)  $\delta$  6.74 (q, *J* = 1.6 Hz, 1H), 4.89 (dd, *J* = 6.3, 4.0 Hz, 1H), 3.92 (d, *J* = 10.7 Hz, 1H), 3.39 (d, *J* = 10.7 Hz, 1H), 3.33 (d, *J* = 9.2 Hz, 1H), 3.29 (s, 3H), 2.71 (ddd, *J* = 14.3, 6.3, 1.1 Hz, 1H), 2.14 (ddd, *J* = 14.2, 9.0, 4.0 Hz, 1H), 1.88 (d, *J* = 1.6 Hz, 3H), 1.53 (s, 3H), 0.85 (s, 9H), 0.03 (s, 3H), 0.02 (s, 3H).

<sup>13</sup>C-NMR (125 MHz, CDCl<sub>3</sub>)  $\delta$  173.4, 169.1, 141.7, 136.2, 105.2, 87.2, 75.7, 66.5, 57.9, 55.7, 35.4, 25.7, 19.1, 18.1, 11.2, -5.6, -5.9.

TOF MS ES<sup>+</sup> (C<sub>19</sub>H<sub>32</sub>NO<sub>5</sub>Si): Calc. [M + H]<sup>+</sup>: 382.2050, Found [M + H]<sup>+</sup>: 382.2051.

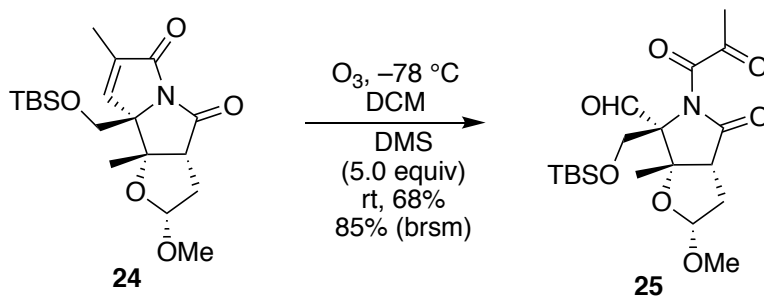

**Synthesis of dicarbonyl 25:** Enone **24** (0.25 g, 0.65 mmol) was dissolved in DCM (50 mL). To this mixture at  $-78\text{ }^\circ\text{C}$  was bubbled ozone for 3 h. The excess ozone was removed via bubbling nitrogen at the same temperature. To the reaction mixture was added dimethyl sulfide (0.25 mL, 3.3 mmol, 5.0 equiv) at  $-78\text{ }^\circ\text{C}$ . The reaction mixture was warmed to room temperature and stirred for 3 h. Saturated aqueous ammonium chloride (20 mL) was added to the reaction mixture and the organic layer was separated. The aqueous layer was extracted with DCM (3 x 20 mL). The combined organics were washed with brine (20 mL), dried over sodium sulfate, and concentrated under reduced pressure. The crude product was purified via column chromatography (ethyl acetate/hexane = 10% to 20%) to give the pure product **25** as an off white solid (180 mg, 0.44 mmol, 68% yield). Starting material **24** (64 mg, 17%) was recovered as well.

mp =  $79\text{--}81\text{ }^\circ\text{C}$

$[\alpha]_D^{23} = -96.0$  (*c* 1.0,  $\text{CHCl}_3$ ).

$^1\text{H-NMR}$  (500 MHz,  $\text{CDCl}_3$ )  $\delta$  9.50 (s, 1H), 4.99 (d,  $J = 4.7\text{ Hz}$ , 1H), 4.18 (d,  $J = 11.3\text{ Hz}$ , 1H), 4.11 (d,  $J = 11.4\text{ Hz}$ , 1H), 3.31 (s, 3H), 2.93 (dd,  $J = 8.2, 0.7\text{ Hz}$ , 1H), 2.45 (dd,  $J = 13.4, 0.7\text{ Hz}$ , 1H), 2.39 (s, 3H), 2.21 (ddd,  $J = 13.2, 8.2, 4.8\text{ Hz}$ , 1H), 1.42 (s, 3H), 0.83 (s, 9H), 0.04 (s, 3H), 0.02 (s, 3H).

$^{13}\text{C}$ -NMR (125 MHz,  $\text{CDCl}_3$ )  $\delta$  196.3, 193.8, 176.4, 168.2, 104.0, 89.8, 75.1, 60.1, 55.0, 51.3, 35.1, 26.2, 25.7, 25.6, 20.0, 17.9, -5.8, -5.9.

TOF MS  $\text{ES}^+$  ( $\text{C}_{19}\text{H}_{32}\text{NO}_7\text{Si}$ ): Calc.  $[\text{M} + \text{H}]^+$ : 414.1948, Found  $[\text{M} + \text{H}]^+$ : 414.1950.

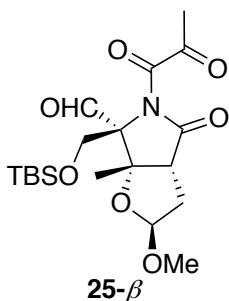

**25- $\beta$**  (170 mg, 0.41 mmol, 82%) was synthesized from **24- $\beta$**  (191 mg, 0.50 mmol), as a white solid according to the procedure described above for the synthesis of **25**.

mp = 71–74 °C

$[\alpha]_{\text{D}}^{23} = +80.0$  ( $c$  1.0,  $\text{CHCl}_3$ ).

$^1\text{H}$ -NMR (500 MHz,  $\text{CDCl}_3$ )  $\delta$  9.47 (s, 1H), 5.10 – 5.03 (m, 2H), 4.18 (d,  $J$  = 11.4 Hz, 1H), 4.06 (d,  $J$  = 11.4 Hz, 1H), 3.30 (s, 3H), 3.09 (ddd,  $J$  = 9.5, 1.5, 0.8 Hz, 1H), 2.64 (ddd,  $J$  = 14.4, 6.2, 1.6 Hz, 1H), 2.40 (s, 3H), 2.25 (ddd,  $J$  = 14.4, 9.4, 3.8 Hz, 1H), 1.53 (s, 3H), 0.84 (s, 9H), 0.05 (s, 3H), 0.02 (s, 3H).

$^{13}\text{C}$ -NMR (125 MHz,  $\text{CDCl}_3$ )  $\delta$  196.8, 193.9, 177.5, 168.4, 105.2, 89.8, 75.0, 59.4, 55.8, 52.7, 35.4, 26.3, 25.6, 19.0, 17.9, -5.8.

TOF MS  $\text{ES}^+$  ( $\text{C}_{19}\text{H}_{32}\text{NO}_7\text{Si}$ ): Calc.  $[\text{M} + \text{H}]^+$ : 414.1948, Found  $[\text{M} + \text{H}]^+$ : 414.1936.

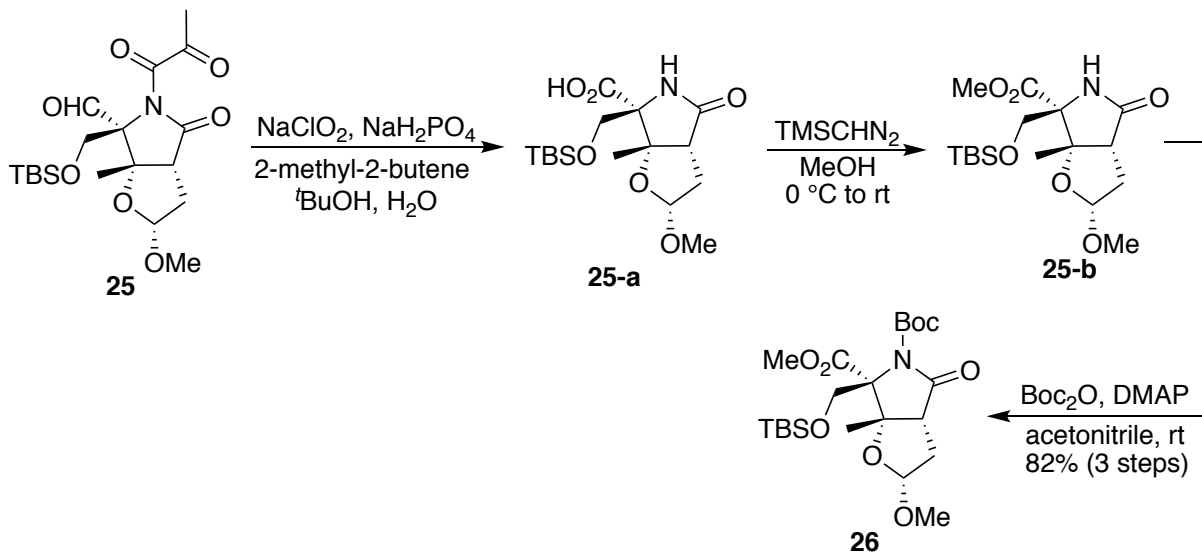

**Synthesis of 26:** Dicarboxyl **25** (0.17 g, 0.41 mmol, 1.0 equiv) was dissolved in *tert*-butyl alcohol (7 mL). To this solution at room temperature was added 2-methyl 2-butene (0.1 mL, 1.0 mmol) followed by addition of sodium chlorite (1.7 mmol, 3.5 mL of 0.5 M aqueous solution) and sodium phosphate mono basic (3.5 mmol, 3.5 mL of 1.0 M aqueous solution). The reaction was stirred at room temperature for 24 h, at which point aqueous saturated  $\text{NH}_4\text{Cl}$  (10 mL) was added to the reaction mixture and the solution was transferred to a separatory funnel. The aqueous layer was extracted with ethyl acetate (5 x 20 mL). The combined organic extracts were dried over sodium sulfate, filtered, and concentrated under reduced pressure. Crude acid **25-a** was used in the following step without further purification.

The crude carboxylic acid **25-a** was dissolved in methanol (10 mL). To this solution at 0 °C trimethylsilyl diazomethane (2.0 M in diethyl ether, 10 equiv, 4.0 mmol, 2.0 mL) was added dropwise under nitrogen. The reaction mixture was stirred for 12 h, during which the reaction mixture was allowed to warm up to room temperature. Aqueous saturated  $\text{NaHCO}_3$  (20 mL) was added to the reaction mixture and the aqueous layer was extracted



with ethyl acetate (4 x 10 mL). The combined organic extracts were washed with brine (20 mL), dried over sodium sulfate, and concentrated under reduced pressure. The resulting methyl ester **25-b** was used in the next step without further purification.

The crude methyl ester **25-b** was dissolved in dried acetonitrile (10 mL). To this mixture under nitrogen at 0 °C were added Boc-anhydride (0.72 g, 3.2 mmol, 8.0 equiv) and DMAP (49 mg, 0.4 mmol, 1.0 equiv). The reaction was stirred at 0 °C for another 5 h upon which, <sup>1</sup>H-NMR confirmed complete consumption of the starting material. It should be noted that monitoring with TLC was not fruitful and thus small aliquots of the reaction were removed, concentrated, and the crude was analyzed by NMR. Volatiles were removed under pressure and the residue was directly loaded onto a column (basified silica with Et<sub>3</sub>N, ethyl acetate/hexane = 10% to 20% as eluent) to yield the Boc protected product **26** as a light yellow oil (160 mg, 0.34 mmol, 82% yield from **25**).

**Data for 26:**

$[\alpha]_D^{23} = -95.0$  (*c* 0.5, CHCl<sub>3</sub>).

<sup>1</sup>H-NMR (500 MHz, CDCl<sub>3</sub>) δ 4.89 (d, *J* = 5.0, 1H), 4.37 (d, *J* = 10.8 Hz, 1H), 4.12 (d, *J* = 10.8 Hz, 1H), 3.74 (s, 3H), 3.21 (s, 3H), 2.76 (d, *J* = 8.1 Hz, 1H), 2.43 (d, *J* = 13.3 Hz, 1H), 2.16 (ddd, *J* = 13.3, 8.1, 5.0 Hz, 1H), 1.48 (s, 9H), 1.44 (s, 3H), 0.82 (s, 9H), 0.02 (s, 3H), -0.01 (s, 3H).

<sup>13</sup>C-NMR (125 MHz, CDCl<sub>3</sub>) δ 173.6, 167.6, 150.0, 103.9, 86.9, 82.9, 62.2, 55.0, 52.1, 51.6, 35.5, 28.2, 28.0, 25.7, 20.5, 18.0, -5.6, -5.8.

TOF MS ES<sup>+</sup> (C<sub>22</sub>H<sub>40</sub>NO<sub>8</sub>Si): Calc. [M + H]<sup>+</sup>: 474.2523, Found [M + H]<sup>+</sup>: 474.2519.

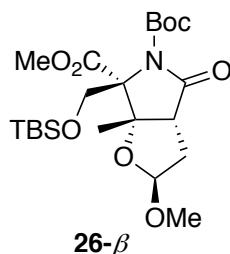

**26-β** (120 mg, 0.25 mmol, 77%, a light red colored oil) was synthesized from the corresponding dicarbonyl **25-β** (140 mg, 0.33 mmol) according to the procedure described above for the synthesis of **26**.

$[\alpha]_D^{23} = +28.0$  (*c* 0.5, CHCl<sub>3</sub>).

<sup>1</sup>H-NMR (500 MHz, CDCl<sub>3</sub>) δ 4.97 (dd, *J* = 6.0, 4.3 Hz, 1H), 4.30 (d, *J* = 10.8 Hz, 1H), 4.14 (d, *J* = 10.8 Hz, 1H), 3.71 (s, 3H), 3.26 (s, 3H), 2.90 (dd, *J* = 9.3, 1.5 Hz, 1H), 2.65 (ddd, *J* = 14.0, 6.0, 1.5 Hz, 1H), 2.15 (ddd, *J* = 14.0, 9.3, 4.3 Hz, 1H), 1.55 (s, 3H), 1.47 (s, 9H), 0.82 (s, 9H), 0.02 (s, 3H), 0.01 (s, 3H).

<sup>13</sup>C-NMR (125 MHz, CDCl<sub>3</sub>) δ 174.8, 167.8, 149.7, 105.1, 85.9, 83.5, 61.6, 55.6, 52.7, 52.0, 35.9, 28.0, 27.8, 25.7, 19.9, 17.9, -5.7, -5.7.

TOF MS ES<sup>+</sup> (C<sub>22</sub>H<sub>40</sub>NO<sub>8</sub>Si): Calc. [M + H]<sup>+</sup>: 474.2523, Found [M + H]<sup>+</sup>: 474.2522.

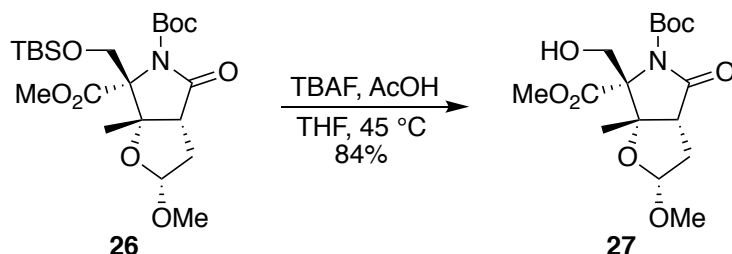

**Synthesis of 27:** To the silyl protected alcohol **26** (1.0 equiv, 0.30 mmol, 0.14 g) in dry THF (10 mL) under argon at 0 °C were added acetic acid (20.0 equiv, 6.00 mmol, 0.33 mL) and TBAF (1.0 M in THF, 10 equiv, 3.0 mmol, 3.0 mL) dropwise. The reaction mixture

was placed in a pre-heated oil bath at 45 °C. The mixture was stirred at this temperature for 48 h, upon which TLC showed completion of the reaction. The reaction mixture was cooled to room temperature and was quenched by the addition of sat. NaHCO<sub>3</sub> (10 mL). The aqueous layer was extracted with ethyl acetate (4 x 10 mL). The combined organic extract was washed with brine (10 mL), dried over sodium sulfate, and concentrated under reduced pressure. The resulting crude product was purified on column chromatography (ethyl acetate/hexane = 50%) to yield the pure alcohol **27** as a white sticky solid (90 mg, 0.25 mmol, 84%).

$[\alpha]_{\text{D}}^{23} = -115.0$  (*c* 1.0, CHCl<sub>3</sub>).

<sup>1</sup>H-NMR (500 MHz, CDCl<sub>3</sub>)  $\delta$  4.89 (d, *J* = 4.9 Hz, 1H), 4.41 (d, *J* = 12.2 Hz, 1H), 4.11 (d, *J* = 12.2 Hz, 1H), 3.75 (s, 3H), 3.20 (s, 3H), 2.96 (d, *J* = 8.0 Hz, 1H), 2.40 (d, *J* = 13.2 Hz, 1H), 2.13 (ddd, *J* = 13.2, 8.0, 4.9 Hz, 1H), 1.98 (br, 1H), 1.48 (s, 12H).

<sup>13</sup>C-NMR (125 MHz, CDCl<sub>3</sub>)  $\delta$  173.9, 162.1, 150.6, 103.9, 86.9, 83.6, 62.3, 55.0, 52.3, 51.2, 35.5, 28.0, 22.7, 20.7.

TOF MS ES<sup>+</sup> (C<sub>16</sub>H<sub>26</sub>NO<sub>8</sub>): Calc. [M + H]<sup>+</sup>: 360.1658, Found [M + H]<sup>+</sup>: 360.1671.

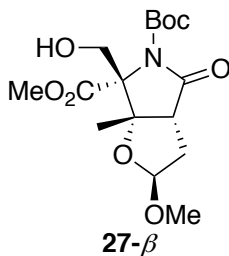

**27-β** (61 mg, 0.17 mmol, 81%, as a white sticky solid) was synthesized according to the procedure described above for the synthesis of **27**.

$[\alpha]_{\text{D}}^{23} = +65.0$  (*c* 1.0, CHCl<sub>3</sub>).

$^1\text{H-NMR}$  (500 MHz,  $\text{CDCl}_3$ )  $\delta$  5.03 – 4.96 (m, 1H), 4.38 (dd,  $J = 11.9, 5.3$  Hz, 1H), 4.18 (dd,  $J = 11.9, 6.3$  Hz, 1H), 3.74 (s, 3H), 3.28 (s, 3H), 3.01 (ddd,  $J = 9.3, 1.6, 0.7$  Hz, 1H), 2.68 (ddd,  $J = 14.1, 6.0, 1.6$  Hz, 1H), 2.18 (ddd,  $J = 14.1, 9.3, 4.1$  Hz, 1H), 1.89 (br, 1H), 1.61 (s, 3H), 1.50 (s, 9H).

$^{13}\text{C-NMR}$  (125 MHz,  $\text{CDCl}_3$ )  $\delta$  174.9, 167.5, 150.0, 105.1, 86.0, 84.0, 61.5, 55.6, 52.5, 52.2, 35.8, 27.9, 27.6, 20.1.

TOF MS  $\text{ES}^+$  ( $\text{C}_{16}\text{H}_{26}\text{NO}_8$ ): Calc.  $[\text{M} + \text{H}]^+$ : 360.1658, Found  $[\text{M} + \text{H}]^+$ : 360.1671.

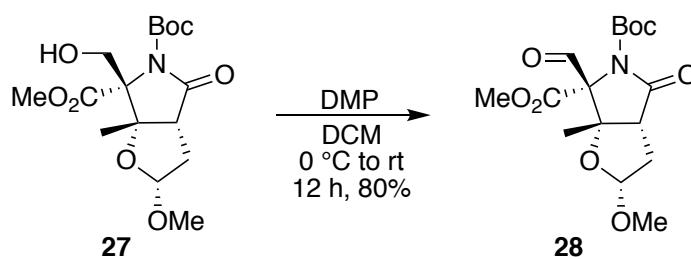

**Synthesis of aldehyde 28:** Alcohol **27** (1.0 equiv, 0.24 mmol, 85 mg) was dissolved in dry DCM (5 mL). To this solution at 0 °C were added Dess-Martin periodinane (5.0 equiv, 1.1 mmol, 400 mg) and sodium bicarbonate (5.0 equiv, 1.1 mmol, 85 mg). The reaction mixture was allowed to warm up to room temperature and stirred for 12 h. The reaction was quenched by addition of saturated sodium thiosulfate (5 mL), saturated sodium bicarbonate (5 mL) and water (5 mL). The mixture was extracted with DCM (4 x 10 mL). The combined organic extract was washed with brine, dried over sodium sulfate, and concentrated under reduced pressure. The crude aldehyde was purified by column chromatography (silica, ethyl acetate/hexane = 20% to 50%) to yield pure aldehyde **28** (68 mg, 0.19 mmol, 80%) as a white sticky gel.

$[\alpha]_{\text{D}}^{23} = -122.0$  ( $c$  1.0,  $\text{CHCl}_3$ ).

$^1\text{H-NMR}$  (500 MHz,  $\text{CDCl}_3$ )  $\delta$  10.08 (s, 1H), 4.96 (d,  $J = 5.0$  Hz, 1H), 3.89 (s, 3H), 3.23 (s, 3H), 2.82 (dd,  $J = 8.2, 0.7$  Hz, 1H), 2.49 (dd,  $J = 13.4, 0.7$  Hz, 1H), 2.16 (ddd,  $J = 13.4, 8.2, 5.0$  Hz, 1H), 1.43 (s, 9H), 1.37 (s, 3H).

$^{13}\text{C-NMR}$  (125 MHz,  $\text{CDCl}_3$ )  $\delta$  196.8, 172.1, 166.7, 105.0, 84.4, 55.5, 52.8, 50.7, 34.8, 27.8, 21.5.

TOF MS  $\text{ES}^+$  ( $\text{C}_{16}\text{H}_{24}\text{NO}_8$ ): Calc.  $[\text{M} + \text{H}]^+$ : 358.1502, Found  $[\text{M} + \text{H}]^+$ : 358.1504.

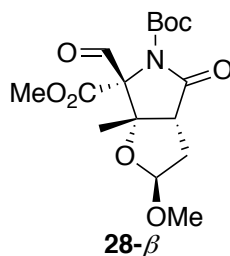

**28- $\beta$**  was synthesis according to the procedure described above for the synthesis of **28**.

50 mg pure aldehyde was isolated (0.14 mmol, 85%) as a white sticky solid.

$[\alpha]_{\text{D}}^{23} = +48.0$  ( $c$  1.0,  $\text{CHCl}_3$ ).

$^1\text{H-NMR}$  (500 MHz,  $\text{CDCl}_3$ )  $\delta$  10.11 (s, 1H), 5.03 (dd,  $J = 5.8, 3.9$  Hz, 1H), 3.87 (s, 3H), 3.32 (s, 3H), 2.99 (dd,  $J = 9.5, 2.6$  Hz, 1H), 2.66 (ddd,  $J = 14.0, 5.8, 2.6$  Hz, 1H), 2.20 (ddd,  $J = 14.0, 9.5, 3.9$  Hz, 1H), 1.51 (s, 3H), 1.43 (s, 9H).

$^{13}\text{C-NMR}$  (125 MHz,  $\text{CDCl}_3$ )  $\delta$  196.3, 172.8, 166.4, 166.2, 106.1, 85.4, 84.7, 55.8, 52.7, 51.9, 35.4, 27.7, 21.6.

TOF MS  $\text{ES}^+$  ( $\text{C}_{16}\text{H}_{23}\text{NO}_8$ ): Calc.  $[\text{M} + \text{H}]^+$ : 358.1502, Found  $[\text{M} + \text{H}]^+$ : 358.1502.

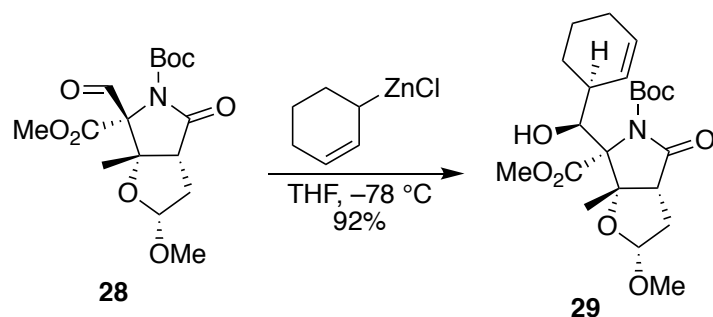

**Synthesis of 29:** Following reported procedures,<sup>4</sup> tributyl(2-cyclohexenyl) stannane (10 equiv, 1.8 mmol, 0.72 g) was dissolved in dry THF (2 mL). To this mixture at  $-78\text{ }^\circ\text{C}$  under argon was added *n*-butyl lithium (10 equiv, 1.8 mmol, 1.0 mL of 1.8 M sol. in hexane) dropwise. After stirring for 1 h at the same temperature,  $\text{ZnCl}_2$  (10 equiv, 1.8 mmol, 1.8 mL of 1.0 M sol. in diethyl ether) was added. The reaction mixture was stirred at  $-78\text{ }^\circ\text{C}$  for another 30 min, after which aldehyde **28** (1.0 equiv, 0.18 mmol, 65 mg) in dry THF (2 mL) was added dropwise. The reaction mixture was further stirred at this temperature for 5 h. Aqueous  $\text{NH}_4\text{Cl}$  (10 mL, sat.) was added at  $-78\text{ }^\circ\text{C}$ , the reaction mixture was warmed to room temperature and the organic layer was separated. The aqueous layer was extracted with ethyl acetate (3 x 10 mL). The combined organic extracts were washed with brine (10 mL), dried over sodium sulfate, and concentrated under reduced pressure. The crude product was purified by column chromatography (silica, ethyl acetate/hexane = 50%) yielding the pure product **29** as a white foam (72 mg, 0.16 mmol, 92% yield).

$[\alpha]_{\text{D}}^{25} = -149.0$  (*c* 1.0,  $\text{CHCl}_3$ ).

$^1\text{H-NMR}$  (500 MHz,  $\text{CDCl}_3$ ).  $\delta$  5.98 (dq,  $J = 10.7, 3.3, 2.6$  Hz, 1H), 5.49 (dd,  $J = 10.7, 2.9$  Hz, 1H), 4.90 (d,  $J = 4.8$  Hz, 1H), 4.25 – 4.17 (m, 1H), 3.78 (s, 3H), 3.25 (s, 2H), 2.99 (d,  $J = 7.9$  Hz, 1H), 2.93 (s, 1H), 2.44 (d,  $J = 13.1$  Hz, 1H), 2.16 (ddd,  $J = 13.1, 7.9, 4.9$  Hz,

1H), 1.98 (m, 2H), 1.84 (d, J = 6.9 Hz, 1H), 1.79 (td, J = 10.1, 9.5, 6.0 Hz, 1H), 1.75 – 1.67 (m, 1H), 1.56 (d, J = 8.8 Hz, 3H), 1.51 (s, 9H), 1.47 (s, 3H).

<sup>13</sup>C-NMR (125 MHz, CDCl<sub>3</sub>) 175.5, 167.1, 150.4, 134.8, 125.2, 103.6, 89.2, 83.1, 76.0, 54.9, 51.9, 51.0, 37.8, 35.8, 30.2, 27.8, 25.1, 20.8, 20.7.

TOF MS ES<sup>+</sup> (C<sub>22</sub>H<sub>34</sub>NO<sub>8</sub>): Calc. [M + H]<sup>+</sup>: 440.2284, Found [M + H]<sup>+</sup>: 440.2286.

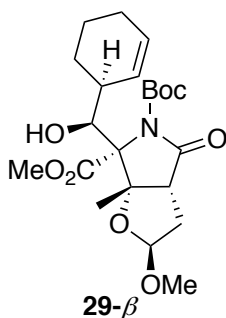

**29-β** was synthesized according to the procedure described above for the synthesis of **29**. **29-β** (51 mg, 0.12 mmol, 92% yield) was isolated as a white foam.

[α]<sub>D</sub><sup>23</sup> = −10.0 (c 1.0, CHCl<sub>3</sub>).

<sup>1</sup>H-NMR (500 MHz, CDCl<sub>3</sub>) δ 5.98 (ddt, J = 10.0, 3.9, 1.9 Hz, 1H), 5.44 (dd, J = 10.0, 2.9 Hz, 1H), 4.99 (dd, J = 6.0, 4.5 Hz, 1H), 4.25 (d, J = 6.4 Hz, 1H), 3.75 (s, 3H), 3.28 (s, 3H), 3.12 (d, J = 9.1 Hz, 1H), 2.90 (br, 1H), 2.65 (ddd, J = 14.0, 6.0, 1.4 Hz, 1H), 2.16 (ddd, J = 14.0, 9.1, 4.5 Hz, 1H), 1.98 (m, 2H), 1.88 – 1.68 (m, 4H), 1.60 (s, 3H), 1.57 – 1.53 (m, 2H), 1.49 (s, 9H).

<sup>13</sup>C-NMR (125 MHz, CDCl<sub>3</sub>) δ 176.3, 167.2, 150.2, 134.6, 125.3, 104.9, 88.0, 83.9, 75.3, 55.6, 52.3, 51.9, 37.8, 36.1, 30.3, 27.8, 25.1, 20.8, 20.2.

TOF MS ES<sup>+</sup> (C<sub>22</sub>H<sub>34</sub>NO<sub>8</sub>): Calc. [M + H]<sup>+</sup>: 440.2284, Found [M + H]<sup>+</sup>: 440.2282.

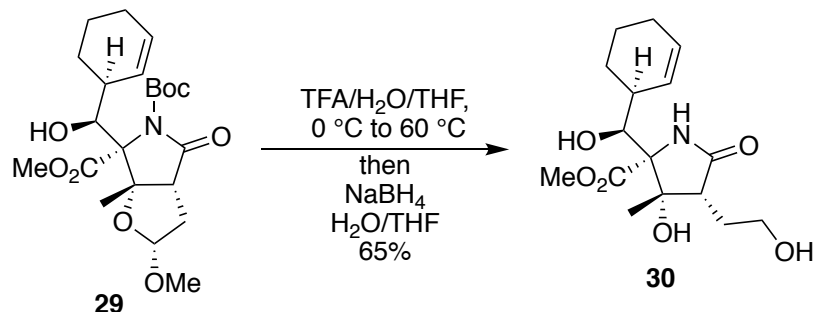

**Synthesis of diol 30:** Following the reported procedure,<sup>4b</sup> to a solution of **29** (1.0 equiv, 0.13 mmol, 60 mg) in distilled THF (0.5 mL) at 0 °C was added a mixture of trifluoroacetic acid and water (1:1, v:v, 2 mL) dropwise. The reaction flask was placed in a preheated oil bath at 60 °C and stirring was continued at this temperature for 2 h. To the mixture at 0 °C was added ice (1.0 g) and toluene (3 mL), and the volatiles were removed under vacuum at room temperature. During the concentration period, toluene was added to the mixture to keep the concentration of TFA low. The resulting residue was dissolved in distilled THF (1 mL) and water (1 mL). To this mixture at 0 °C was added sodium borohydride (25 mg, 0.65 mmol, 5.0 equiv) and the mixture was stirred for 1 h. The reaction was quenched with saturated solution of ammonium chloride (5 mL) and the mixture was extracted with ethyl acetate (5 x 10 mL). The combined organic extracts were washed with brine, dried over sodium sulfate, and concentrated under reduced pressure to give the crude product as a white solid. The crude product was purified on silica column chromatography (silica, ethyl acetate/hexane = 20% then methanol/ethyl acetate = 5%) to give pure **30** as a white foam (28 mg, 0.08 mmol, 65%).

Similar procedure was utilized to convert **29- $\beta$**  (50 mg, 0.11 mmol) to **30** (25 mg, 0.07 mmol, 69%).

$[\alpha]_{\text{D}}^{23} = -55.0$  (*c* 1.0, CHCl<sub>3</sub>)



$^1\text{H-NMR}$  (500 MHz,  $\text{CDCl}_3$ )  $\delta$  8.44 (s, 1H), 6.10 – 6.02 (m, 1H), 5.74 (ddd,  $J = 10.3, 3.8, 2.1$  Hz, 1H), 5.31 (s, 1H), 4.11 (m, 1H), 3.81 (s, 3H), 3.79 – 3.76 (m, 1H), 3.75 – 3.61 (m, 1H), 2.89 – 2.74 (m, 1H), 2.22 – 2.15 (m, 1H), 2.11 – 2.01 (m, 1H), 2.02 – 1.88 (m, 3H), 1.82 – 1.65 (m, 3H), 1.61 – 1.54 (m, 2H), 1.53 (s, 3H).

$^{13}\text{C-NMR}$  (125 MHz,  $\text{CDCl}_3$ )  $\delta$  180.6, 172.6, 135.1, 123.4, 81.7, 79.9, 77.3, 77.0, 76.7, 75.3, 62.2, 52.9, 38.7, 28.6, 26.2, 24.8, 20.4, 19.8.

TOF MS  $\text{ES}^+$  ( $\text{C}_{16}\text{H}_{26}\text{NO}_6$ ): Calc.  $[\text{M} + \text{H}]^+$ : 328.1760, Found  $[\text{M} + \text{H}]^+$ : 328.1760.

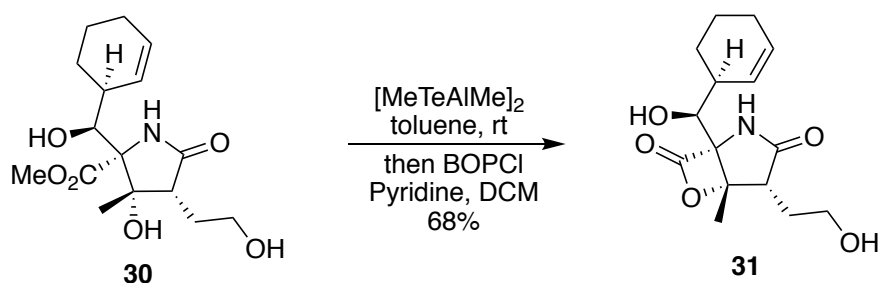

**Synthesis of  $\beta$ -lactone 31:**<sup>5</sup> To a suspension of tellurium (0.72 g, 5.60 mmol) in toluene (2.5 mL) was added  $\text{Me}_3\text{Al}$  (2.0 M in toluene, 2.5 mL, 5.0 mmol). The mixture was refluxed for 6 h and cooled to room temperature. The resulting  $[\text{MeAlTeMe}]_2$  (ca 0.8 M in toluene, 2.0 mL, 8.0 mmol, 10 equiv) was added to **30** (25.0 mg, 0.08 mmol). After stirring at room temperature for 12 h, the reaction mixture was diluted with ethyl acetate (5 mL).  $\text{HCl}$  (1.0 M, 3 mL) was added slowly to the mixture at  $0^\circ\text{C}$ . The reaction mixture was further stirred at room temperature for 2 h. The acidified aqueous layer ( $\text{pH} = 1$ ) was extracted with ethyl acetate/ethanol (20:1 v:v, 20 mL). The combined organic extracts were dried over sodium sulfate, and concentrated under reduced pressure to yield the crude carboxylic acid as an off white solid, which was used in the following step without purification.

To a solution of the carboxylic acid (20 mg) in dichloromethane (2 mL) were added pyridine (0.3 mL) and BOPCl (100 mg, 0.25 mmol), and the mixture was stirred at room temperature for 3.5 h. The reaction mixture was diluted with ethyl acetate (5 mL) and saturated NH<sub>4</sub>Cl (5 mL). The organic layer was separated and the aqueous layer was extracted with ethyl acetate (4 x 5 mL). The combined organic extracts were washed with brine (5 mL), dried over sodium sulfate, and concentrated under reduced pressure. The crude product was purified by column chromatography (silica, ethyl acetate/hexane = 20% to 50%) to give the  $\beta$ -lactone **31** (12.0 mg, 0.04 mmol, 68%) as a colorless gel:

$[\alpha]_{\text{D}}^{23} = -72.0$  (*c* 0.5, MeOH)

<sup>1</sup>H-NMR (500 MHz, pyridine-*d*<sub>5</sub>)  $\delta$  10.60 (s, 1H), 6.46 (d, *J* = 10.3 Hz, 1H), 5.91 (ddd, *J* = 10.3, 4.9, 2.5 Hz, 1H), 5.08 (br, 2H), 4.30 (m, 2H), 4.20 (dt, *J* = 8.8, 6.4 Hz, 1H), 3.41 (t, *J* = 7.0 Hz, 1H), 2.90 (m, 1H), 2.56 (m, 1H), 2.34 (m, 3H), 2.19 (s, 3H), 1.99 – 1.90 (m, 2H), 1.74 (m, 2H), 1.40 (m, 1H).

<sup>13</sup>C-NMR (125 MHz, pyridine-*d*<sub>5</sub>)  $\delta$  178.7, 170.3, 129.4, 129.2, 87.5, 80.6, 71.5, 60.3, 46.7, 39.8, 29.6, 26.9, 25.8, 22.2, 20.7.

TOF MS ES<sup>+</sup> (C<sub>15</sub>H<sub>22</sub>NO<sub>5</sub>): Calc. [M + H]<sup>+</sup>: 296.1498, Found [M + H]<sup>+</sup>: 296.1497.

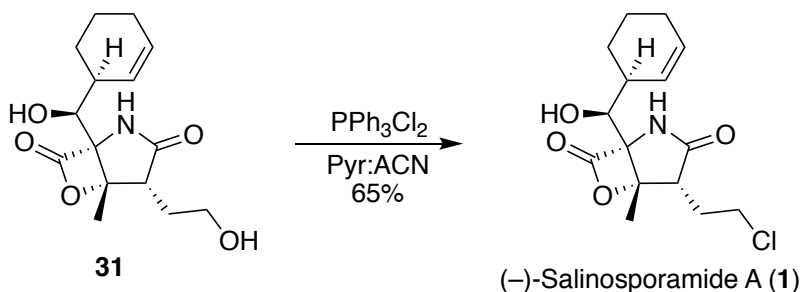

**Synthesis of (-)-Salinosporamide A (1):**  $\beta$ -lactone **31** (8.0 mg, 0.03 mmol) was dissolved in acetonitrile (0.5 mL) and anhydrous pyridine (0.5 mL) at room temperature under argon. To this solution was added  $\text{Ph}_3\text{PCl}_2$  (5.00 equiv, 0.16 mmol, 55.0 mg), and stirring was continued for 3.5 h. The reaction was quenched by addition of water (5 mL) followed by addition of ethyl acetate (5 mL). The aqueous layer was extracted with ethyl acetate (4 x 5 mL), combined extracts were washed with brine (5 mL), dried over sodium sulfate and concentrated under reduced pressure. The crude product was purified by column chromatography (silica, ethyl acetate = 20% to 40%) to yield (-)-salinosporamide (**1**) A as a white solid (6.0 mg, 0.02 mmol, 64%).

$[\alpha]_{\text{D}}^{23} = -69.0$  ( $c$  0.4, MeOH)

$^1\text{H-NMR}$  (500 MHz, pyridine- $d_5$ )  $\delta$  10.67 (s, 1H), 6.45 (d,  $J = 10.3$  Hz, 1H), 5.91 (d,  $J = 10.3$  Hz, 1H), 5.02 (br, 1H), 4.28 (t,  $J = 9.1$  Hz, 1H), 4.21 – 4.11 (m, 1H), 4.05 (m, 1H), 3.21 (t,  $J = 7.2$  Hz, 1H), 2.94 – 2.82 (m, 1H), 2.56 – 2.47 (m, 1H), 2.41 – 2.30 (m, 2H), 2.10 (d,  $J = 2.3$  Hz, 3H), 1.99 – 1.90 (m, 2H), 1.72 (t,  $J = 11.0$  Hz, 2H), 1.42 – 1.36 (m, 1H).

$^{13}\text{C-NMR}$  (125 MHz, pyridine- $d_5$ )  $\delta$  176.8, 169.3, 128.9, 128.6, 86.2, 80.2, 70.8, 46.0, 43.2, 39.2, 28.9, 26.3, 25.2, 21.6, 19.9.

TOF MS  $\text{ES}^+$  ( $\text{C}_{15}\text{H}_{21}\text{ClNO}_4$ ): Calc.  $[\text{M} + \text{H}]^+$ : 314.1159, Found  $[\text{M} + \text{H}]^+$ : 314.1165

## Crystallographic analysis

Crystal data for **5** (enantio-pure);

CCDC 1879957

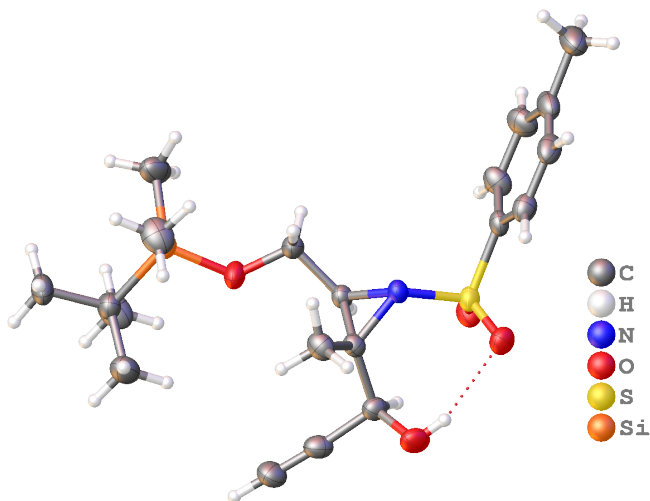

**Experimental.** Single colorless plate-shaped crystals of **5** were used as received. A suitable crystal (0.46×0.32×0.05) mm<sup>3</sup> was selected and mounted on a nylon loop with paratone oil on a Bruker APEX-II CCD diffractometer. The crystal was kept at  $T = 173(2)$  K during data collection. Using **Olex2**,<sup>6</sup> the structure was solved with the XT structure solution program, using the Intrinsic

| Compound                     | 5                                                   |
|------------------------------|-----------------------------------------------------|
| Formula                      | C <sub>20</sub> H <sub>31</sub> NO <sub>4</sub> SSi |
| $D_{calc.}/\text{g cm}^{-3}$ | 1.194                                               |
| $\mu/\text{mm}^{-1}$         | 0.218                                               |
| Formula Weight               | 409.61                                              |
| Color                        | colorless                                           |
| Shape                        | plate                                               |
| Size/mm <sup>3</sup>         | 0.46×0.32×0.05                                      |
| $T/\text{K}$                 | 173(2)                                              |
| Crystal System               | orthorhombic                                        |
| Flack                        | -0.02(2)                                            |
| Parameter                    |                                                     |
| Hooft                        | -0.02(2)                                            |
| Parameter                    |                                                     |
| Space Group                  | $P2_12_12_1$                                        |
| $a/\text{\AA}$               | 10.307(2)                                           |
| $b/\text{\AA}$               | 12.283(3)                                           |
| $c/\text{\AA}$               | 17.991(4)                                           |
| $\alpha^\circ$               | 90                                                  |

Phasing solution method. The model was refined with version of **XL** using Least Squares minimisation.

**Crystal Data.** C<sub>20</sub>H<sub>31</sub>NO<sub>4</sub>SSi, *M<sub>r</sub>* = 409.61, orthorhombic, *P*2<sub>1</sub>2<sub>1</sub>2<sub>1</sub> (No. 19), *a* = 10.307(2) Å, *b* = 12.283(3) Å, *c* = 17.991(4) Å,  $\alpha = \beta = \gamma = 90^\circ$ , *V* = 2277.7(8) Å<sup>3</sup>, *T* = 173(2) K, *Z* = 4, *Z'* = 1,  $\mu(\text{MoK}\alpha) = 0.218$ , 43882 reflections measured, 5640 unique (*R<sub>int</sub>* = 0.0420) which were used in all calculations. The final *wR<sub>2</sub>* was 0.0993 (all data) and *R<sub>1</sub>* was 0.0372 (*I* > 2(*I*)).

|                                  |              |
|----------------------------------|--------------|
| $\beta^\circ$                    | 90           |
| $\gamma^\circ$                   | 90           |
| <i>V</i> /Å <sup>3</sup>         | 2277.7(8)    |
| <i>Z</i>                         | 4            |
| <i>Z'</i>                        | 1            |
| Wavelength/Å                     | 0.710730     |
| Radiation type                   | MoK $\alpha$ |
| $\theta_{min}^\circ$             | 2.007        |
| $\theta_{max}^\circ$             | 28.441       |
| Measured Refl.                   | 43882        |
| Independent Refl.                | 5640         |
| Reflections Used                 | 5095         |
| <i>R<sub>int</sub></i>           | 0.0420       |
| Parameters                       | 255          |
| Restraints                       | 0            |
| Largest Peak                     | 0.310        |
| Deepest Hole                     | -0.217       |
| GooF                             | 1.050        |
| <i>wR<sub>2</sub></i> (all data) | 0.0993       |

## Structure Quality Indicators

Reflection: d min (Mo) 0.75  $I/\sigma$  25.0 Rint 4.20% complete 98%

Refinement: Shift 0.000 Max Peak 0.3 Min Peak -0.2 GooF 1.050 -0.02(2)

A colorless plate-shaped crystal with dimensions 0.46×0.32×0.05 mm<sup>3</sup> was mounted on a nylon loop with paratone oil. Data were collected using a Bruker APEX-II CCD diffractometer equipped with an Oxford Cryosystems low-temperature device, operating at  $T = 173(2)$  K.

Data were measured using  $\omega$  of  $-0.50^\circ$  per frame for 200.84 s using MoK $_{\alpha}$  radiation (sealed tube, 50 kV, 40 mA). The total number of runs and images was based on the strategy calculation from the program **COSMO**.<sup>7</sup> The actually achieved resolution was  $\theta = 28.441$ .

Cell parameters were retrieved using the **SAINT**<sup>8</sup> software and refined using **SAINT**<sup>8</sup> on 9967 reflections, 23 % of the observed reflections. Data reduction was performed using the **SAINT**<sup>8</sup> software which corrects for Lorentz polarisation. The final completeness is 100.00 out to 28.441 in  $\theta$ . A multi-scan absorption correction was performed using SADABS-2014/5 (Bruker,2014/5) was used for absorption correction.  $wR_2$  was 0.0660 before and 0.0554 after correction. The Ratio of minimum to maximum transmission is 0.9136. The  $\lambda/2$  correction factor is 0.00150. The absorption coefficient  $\mu$  of this material is 0.218 mm<sup>-1</sup> at this wavelength ( $\lambda = 0.71073\text{\AA}$ ) and the minimum and maximum transmissions are 0.6813 and 0.7457. SADABS-2014/5 (Bruker,2014/5)

was used for absorption correction.  $wR_2$  was 0.0660 before and 0.0554 after correction. The Ratio of minimum to maximum transmission is 0.9136. The  $\lambda/2$  correction factor is 0.00150.

The structure was solved in the space group  $P2_12_12_1$  (# 19) by Intrinsic Phasing using the **XT**<sup>9</sup> structure solution program. The structure was refined by Least Squares using version 2014/6 of **XL**<sup>9</sup> incorporated in **Olex2**.<sup>6</sup> All non-hydrogen atoms were refined anisotropically. Hydrogen atom positions were calculated geometrically and refined using the riding model, except for the Hydrogen atom on the oxygen atom which was found by difference Fourier methods and refined isotropically.

There is a single molecule in the asymmetric unit, which is represented by the reported sum formula. In other words: Z is 4 and Z' is 1.

The Flack parameter was refined to -0.02(2). Determination of absolute structure using Bayesian statistics on Bijvoet differences using the Olex2 results in -0.02(2). Note: The Flack parameter is used to determine chirality of the crystal studied, the value should be near 0, a value of 1 means that the stereochemistry is wrong and the model should be inverted. A value of 0.5 means that the crystal consists of a racemic mixture of the two enantiomers.

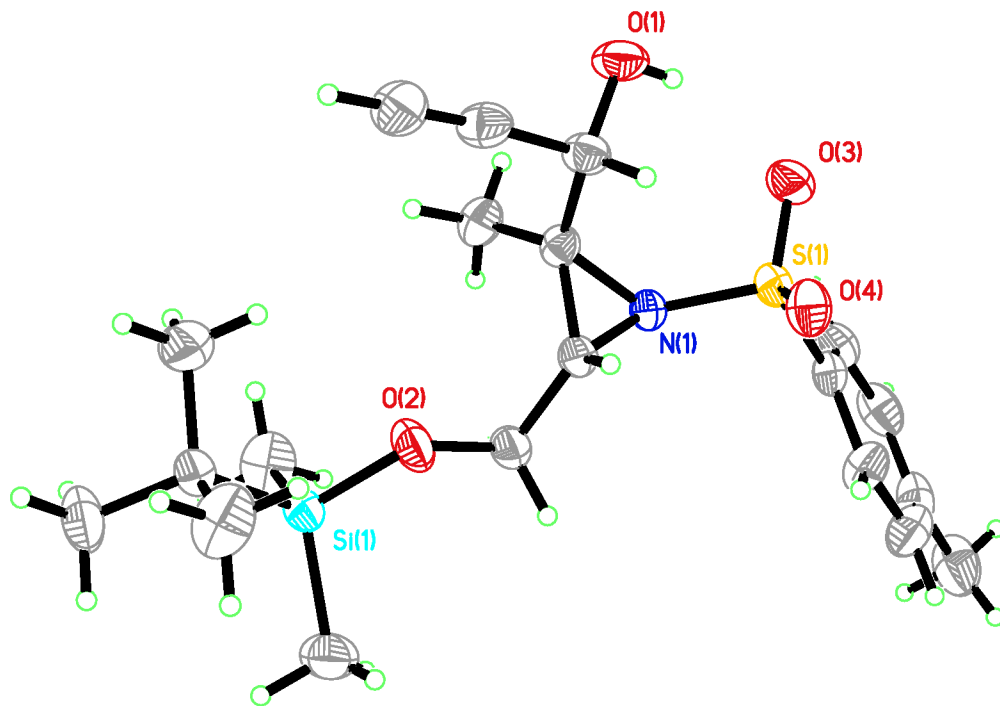

**Figure S1.** X-ray structure of **5** (view 1).

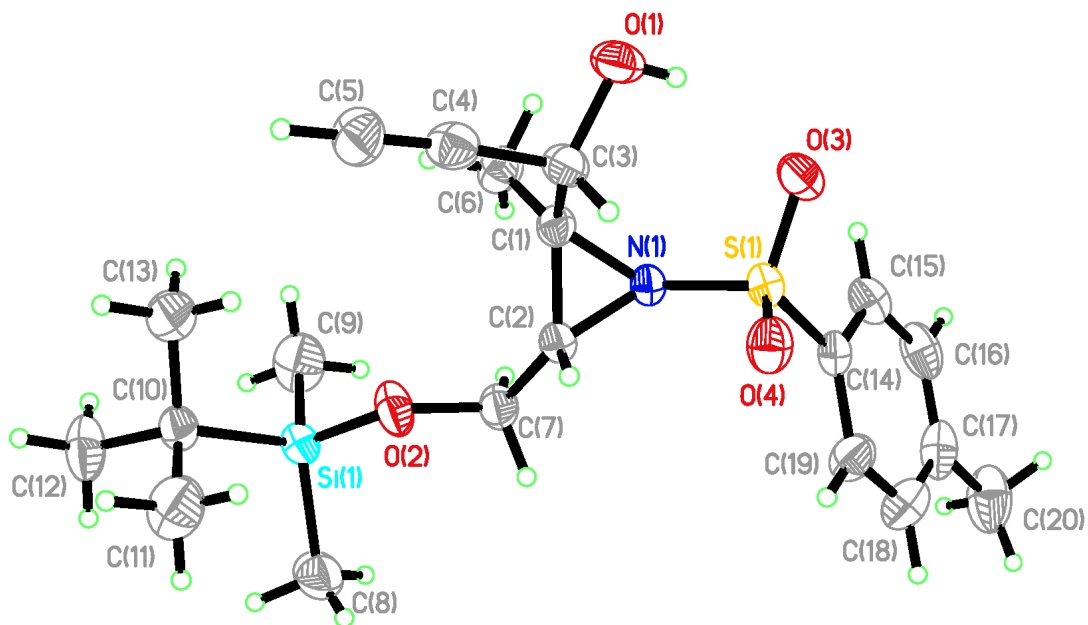

**Figure S2.** The model has chirality at C1 (Chiral SPGR) S verify; The model has chirality at C2 (Chiral SPGR) S verify; The model has chirality at C3 (Chiral SPGR) S verify.



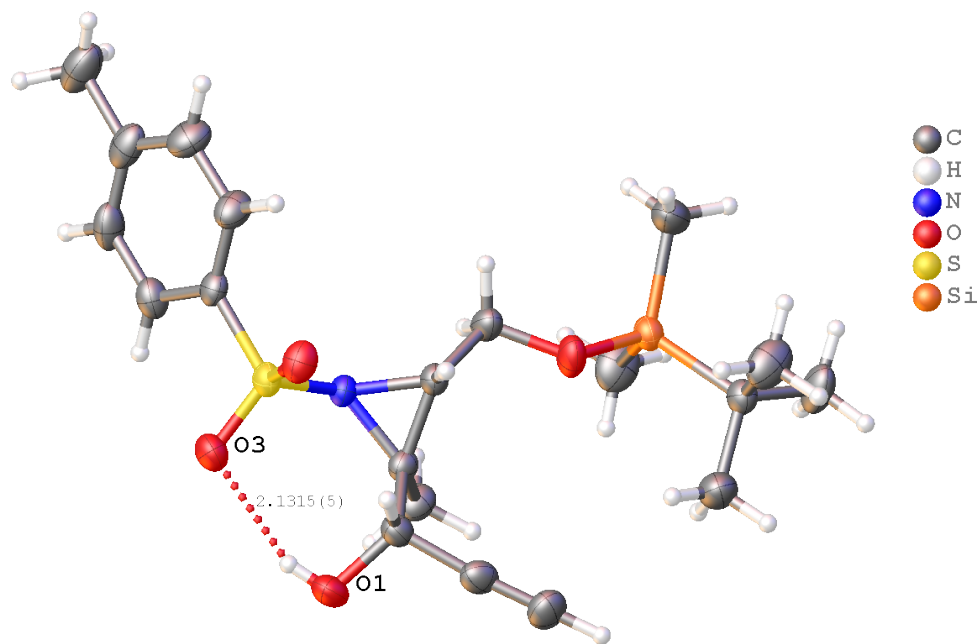

**Figure S3.** The following hydrogen bonding interactions with a maximum D-D distance of 2.9 Å and a minimum angle of 120 ° are present in **5**: O1–O3: 2.865 Å.

**Table S4:** Fractional Atomic Coordinates ( $\times 10^4$ ) and Equivalent Isotropic Displacement Parameters ( $\text{Å}^2 \times 10^3$ ) for **5**.  $U_{eq}$  is defined as 1/3 of the trace of the orthogonalised  $U_{ij}$ .

| Atom | x          | y          | z          | $U_{eq}$  |
|------|------------|------------|------------|-----------|
| S1   | 828.6(5)   | 6886.9(5)  | 4781.5(3)  | 29.27(14) |
| Si1  | 5881.5(7)  | 5337.9(5)  | 2770.5(4)  | 30.61(16) |
| O1   | 429.0(18)  | 4081.6(17) | 4822.9(13) | 44.0(5)   |
| O2   | 4872.6(17) | 5517.8(16) | 3472.8(11) | 41.2(4)   |
| O3   | -385.9(17) | 6311.0(15) | 4848.5(11) | 41.4(4)   |
| O4   | 1622.2(18) | 6996.9(16) | 5431.6(10) | 38.5(4)   |
| N1   | 1616.0(18) | 6305.4(15) | 4079.7(11) | 27.4(4)   |
| C1   | 2001(2)    | 5125.6(18) | 4083.4(13) | 27.8(5)   |

|     |         |            |            |         |
|-----|---------|------------|------------|---------|
| C2  | 3003(2) | 5993.0(19) | 4150.1(13) | 28.3(5) |
| C3  | 1748(2) | 4458(2)    | 4789.7(15) | 32.6(5) |
| C4  | 2615(3) | 3501(2)    | 4781.9(15) | 37.8(5) |
| C5  | 3375(3) | 2779(2)    | 4767.9(18) | 47.0(7) |
| C6  | 1730(3) | 4554(2)    | 3359.2(14) | 38.3(6) |
| C7  | 3886(2) | 6318(2)    | 3517.2(15) | 35.2(5) |
| C8  | 6873(3) | 6589(2)    | 2629(2)    | 55.2(8) |
| C9  | 4948(4) | 5015(3)    | 1911.7(18) | 56.2(8) |
| C10 | 6914(2) | 4152(2)    | 3075.2(14) | 33.1(5) |
| C11 | 7723(4) | 4472(3)    | 3752.3(19) | 58.3(9) |
| C12 | 7836(3) | 3807(3)    | 2447.9(18) | 53.8(8) |
| C13 | 6056(3) | 3185(2)    | 3284(2)    | 53.9(8) |
| C14 | 521(2)  | 8191.0(19) | 4413.2(12) | 29.4(5) |
| C15 | -561(2) | 8341(2)    | 3964.5(14) | 37.1(6) |
| C16 | -817(3) | 9376(2)    | 3693.2(15) | 43.3(6) |
| C17 | -11(3)  | 10251(2)   | 3855.4(15) | 44.2(7) |
| C18 | 1065(3) | 10074(2)   | 4305.9(16) | 47.4(7) |
| C19 | 1340(3) | 9046(2)    | 4588.7(16) | 39.7(6) |
| C20 | -280(4) | 11368(3)   | 3534(2)    | 62.0(9) |

---

**Table S5:** Anisotropic Displacement Parameters ( $\times 10^4$ ) **5.** The anisotropic displacement factor exponent takes the form:  $-2\pi^2[h^2a^{*2} \times U_{11} + \dots + 2hka^* \times b^* \times U_{12}]$

| Atom | $U_{11}$ | $U_{22}$ | $U_{33}$ | $U_{23}$ | $U_{13}$  | $U_{12}$ |
|------|----------|----------|----------|----------|-----------|----------|
| S1   | 25.2(3)  | 31.9(3)  | 30.8(3)  | -1.1(2)  | 3.4(2)    | 3.6(2)   |
| Si1  | 25.7(3)  | 33.6(3)  | 32.6(3)  | -0.5(2)  | 3.0(3)    | 1.5(3)   |
| O1   | 31.3(9)  | 36.6(10) | 64.1(13) | 9.2(10)  | 4.3(9)    | -7.0(8)  |
| O2   | 33.2(9)  | 45.3(11) | 45.2(10) | 5.9(9)   | 13.2(8)   | 11.4(8)  |
| O3   | 29.4(8)  | 42.2(10) | 52.7(11) | 2.3(9)   | 8.7(8)    | -0.5(8)  |
| O4   | 40.7(9)  | 43.3(10) | 31.4(8)  | -2.6(7)  | -1.6(7)   | 8.9(8)   |
| N1   | 24.6(9)  | 26.0(9)  | 31.5(9)  | -1.1(8)  | 2.6(8)    | 3.5(7)   |
| C1   | 26.1(10) | 26.4(11) | 31.1(11) | 0.1(9)   | -1.9(9)   | 2.9(9)   |
| C2   | 23.9(10) | 27.3(11) | 33.7(11) | -0.3(9)  | 1.8(9)    | 2.5(9)   |
| C3   | 27.0(11) | 32.2(12) | 38.5(12) | 4.5(10)  | 0.3(10)   | -1.5(9)  |
| C4   | 37.1(12) | 34.5(12) | 41.6(13) | 9.8(11)  | -3.5(11)  | -2.6(11) |
| C5   | 46.8(15) | 39.4(14) | 54.9(16) | 11.9(12) | 1.4(14)   | 7.6(12)  |
| C6   | 42.7(14) | 34.4(13) | 38.0(13) | -5.3(10) | -5.8(11)  | 2.2(11)  |
| C7   | 33.5(12) | 29.4(12) | 42.8(13) | 3.9(10)  | 10.8(10)  | 3.8(10)  |
| C8   | 39.4(15) | 40.2(16) | 86(2)    | 13.1(15) | 7.9(16)   | -2.0(13) |
| C9   | 58.7(19) | 64(2)    | 46.4(16) | -4.5(15) | -16.0(14) | 11.4(16) |
| C10  | 29.3(11) | 33.0(12) | 36.8(12) | -1(1)    | 5.1(10)   | 2.9(10)  |
| C11  | 64(2)    | 55.6(19) | 55.5(19) | -5.2(15) | -21.7(16) | 12.4(16) |
| C12  | 54.7(18) | 53.3(18) | 53.3(17) | 6.8(14)  | 20.5(15)  | 23.5(15) |

|     |          |          |          |          |          |          |
|-----|----------|----------|----------|----------|----------|----------|
| C13 | 46.3(16) | 37.7(15) | 78(2)    | 7.0(14)  | 10.0(15) | 1.2(13)  |
| C14 | 27.8(11) | 30.0(11) | 30.3(11) | -3.5(9)  | 3.6(8)   | 6.8(9)   |
| C15 | 28.3(12) | 48.1(15) | 34.8(12) | 1.3(11)  | 0.9(9)   | 3.6(10)  |
| C16 | 34.0(13) | 59.1(17) | 36.9(13) | 10.8(12) | 2.8(11)  | 16.1(13) |
| C17 | 53.8(17) | 42.8(15) | 36.0(13) | 2.3(12)  | 11.1(12) | 18.6(13) |
| C18 | 59.6(18) | 33.2(13) | 49.4(15) | -6.1(11) | -0.9(14) | 2.3(13)  |
| C19 | 41.8(14) | 34.1(13) | 43.2(14) | -7.4(11) | -9.0(11) | 3.7(11)  |
| C20 | 75(2)    | 52.0(18) | 58.9(19) | 15.3(16) | 17.9(18) | 25.6(17) |

---

**Table S6:** Bond Lengths in Å for 5

| <b>Atom</b> | <b>Atom</b> | <b>Length/Å</b> |
|-------------|-------------|-----------------|
| S1          | O3          | 1.4428(19)      |
| S1          | O4          | 1.4336(19)      |
| S1          | N1          | 1.6622(19)      |
| S1          | C14         | 1.762(2)        |
| Si1         | O2          | 1.6512(18)      |
| Si1         | C8          | 1.864(3)        |
| Si1         | C9          | 1.863(3)        |
| Si1         | C10         | 1.886(3)        |
| O1          | C3          | 1.437(3)        |
| O2          | C7          | 1.417(3)        |
| N1          | C1          | 1.503(3)        |
| N1          | C2          | 1.486(3)        |
| C1          | C2          | 1.489(3)        |
| C1          | C3          | 1.535(3)        |
| C1          | C6          | 1.506(3)        |
| C2          | C7          | 1.511(3)        |
| C3          | C4          | 1.477(3)        |
| C4          | C5          | 1.183(4)        |
| C10         | C11         | 1.528(4)        |
| C10         | C12         | 1.535(4)        |

|     |     |          |
|-----|-----|----------|
| C10 | C13 | 1.528(4) |
| C14 | C15 | 1.388(3) |
| C14 | C19 | 1.384(4) |
| C15 | C16 | 1.387(4) |
| C16 | C17 | 1.390(4) |
| C17 | C18 | 1.391(4) |
| C17 | C20 | 1.514(4) |
| C18 | C19 | 1.390(4) |

---

**Table S7:** Bond angles in ° for 5.

| Atom | Atom | Atom | Angle°     |
|------|------|------|------------|
| O3   | S1   | N1   | 106.05(11) |
| O3   | S1   | C14  | 108.71(11) |
| O4   | S1   | O3   | 118.23(12) |
| O4   | S1   | N1   | 112.43(10) |
| O4   | S1   | C14  | 108.89(12) |
| N1   | S1   | C14  | 101.13(10) |
| O2   | Si1  | C8   | 109.85(14) |
| O2   | Si1  | C9   | 109.75(14) |
| O2   | Si1  | C10  | 103.68(10) |
| C8   | Si1  | C10  | 111.55(13) |
| C9   | Si1  | C8   | 110.21(17) |
| C9   | Si1  | C10  | 111.62(14) |
| C7   | O2   | Si1  | 126.02(16) |
| C1   | N1   | S1   | 122.69(15) |
| C2   | N1   | S1   | 121.07(16) |
| C2   | N1   | C1   | 59.75(14)  |
| N1   | C1   | C3   | 118.29(19) |
| N1   | C1   | C6   | 113.37(19) |
| C2   | C1   | N1   | 59.57(14)  |
| C2   | C1   | C3   | 115.71(19) |

|     |     |     |            |
|-----|-----|-----|------------|
| C2  | C1  | C6  | 122.1(2)   |
| C6  | C1  | C3  | 115.8(2)   |
| N1  | C2  | C1  | 60.68(14)  |
| N1  | C2  | C7  | 116.53(19) |
| C1  | C2  | C7  | 123.1(2)   |
| O1  | C3  | C1  | 111.6(2)   |
| O1  | C3  | C4  | 108.4(2)   |
| C4  | C3  | C1  | 108.3(2)   |
| C5  | C4  | C3  | 175.7(3)   |
| O2  | C7  | C2  | 106.93(19) |
| C11 | C10 | Si1 | 109.93(19) |
| C11 | C10 | C12 | 108.6(2)   |
| C11 | C10 | C13 | 108.6(3)   |
| C12 | C10 | Si1 | 110.44(18) |
| C13 | C10 | Si1 | 110.21(18) |
| C13 | C10 | C12 | 108.9(2)   |
| C15 | C14 | S1  | 118.95(19) |
| C19 | C14 | S1  | 119.61(18) |
| C19 | C14 | C15 | 121.4(2)   |
| C16 | C15 | C14 | 118.6(3)   |
| C16 | C17 | C18 | 118.5(3)   |
| C16 | C17 | C20 | 120.7(3)   |



|     |     |     |          |
|-----|-----|-----|----------|
| C18 | C17 | C20 | 120.8(3) |
| C19 | C18 | C17 | 121.2(3) |
| C14 | C19 | C18 | 118.8(3) |

---

**Table S8:** Hydrogen fractional atomic coordinates ( $\times 10^4$ ) and equivalent isotropic displacement parameters ( $\text{\AA}^2 \times 10^3$ ) for **5**.  $U_{eq}$  is defined as 1/3 of the trace of the orthogonalised  $U_{ij}$ .

| Atom | x      | y        | z        | $U_{eq}$ |
|------|--------|----------|----------|----------|
| H1   | 20(30) | 4610(30) | 4850(20) | 51(10)   |
| H2   | 3382   | 6084     | 4658     | 34       |
| H3   | 1939   | 4914     | 5237     | 39       |
| H5   | 3985   | 2200     | 4757     | 56       |
| H6A  | 831    | 4295     | 3355     | 58       |
| H6B  | 2320   | 3933     | 3305     | 58       |
| H6C  | 1863   | 5062     | 2946     | 58       |
| H7A  | 3393   | 6350     | 3045     | 42       |
| H7B  | 4270   | 7044     | 3613     | 42       |
| H8A  | 7671   | 6402     | 2361     | 83       |
| H8B  | 7096   | 6905     | 3113     | 83       |
| H8C  | 6375   | 7120     | 2339     | 83       |
| H9A  | 4432   | 4356     | 1992     | 84       |
| H9B  | 5551   | 4897     | 1498     | 84       |
| H9C  | 4369   | 5624     | 1793     | 84       |
| H11A | 8274   | 5096     | 3627     | 87       |
| H11B | 8269   | 3857     | 3902     | 87       |
| H11C | 7145   | 4669     | 4163     | 87       |
| H12A | 7330   | 3613     | 2006     | 81       |

|      |        |       |      |    |
|------|--------|-------|------|----|
| H12B | 8346   | 3176  | 2609 | 81 |
| H12C | 8421   | 4411  | 2328 | 81 |
| H13A | 5508   | 3382  | 3709 | 81 |
| H13B | 6604   | 2563  | 3418 | 81 |
| H13C | 5506   | 2989  | 2860 | 81 |
| H15  | -1114  | 7747  | 3846 | 45 |
| H16  | -1560  | 9489  | 3390 | 52 |
| H18  | 1622   | 10665 | 4423 | 57 |
| H19  | 2077   | 8933  | 4897 | 48 |
| H20A | -6     | 11385 | 3012 | 93 |
| H20B | 203,hh | 11918 | 3815 | 93 |
| H20C | -1211  | 11523 | 3565 | 93 |

**Table S9:** Hydrogen bond information for **5**.

| <b>D</b> | <b>H</b> | <b>A</b> | <b>d(D-H)/Å</b> | <b>d(H-A)/Å</b> | <b>d(D-A)/Å</b> | <b>D-H-A/deg</b> |
|----------|----------|----------|-----------------|-----------------|-----------------|------------------|
| O1       | H1       | O3       | 0.78(4)         | 2.13(4)         | 2.865(3)        | 158(3)           |

Crystal data for 12 (racemic); CCDC 1881929

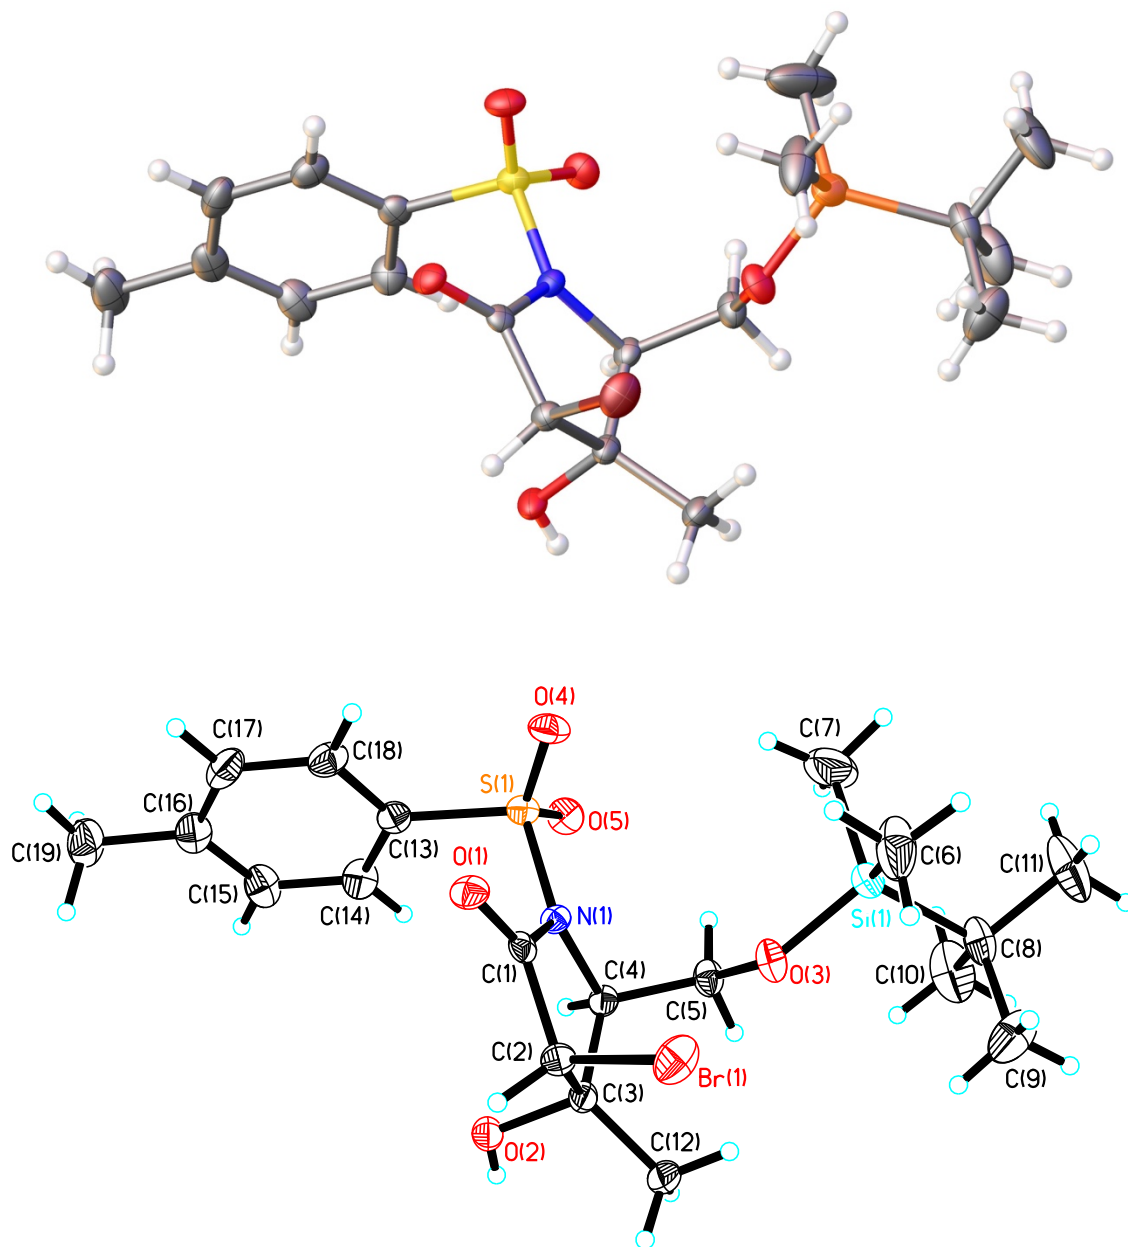

Figure S4. Perspective views of 12 showing 50% probability displacement.

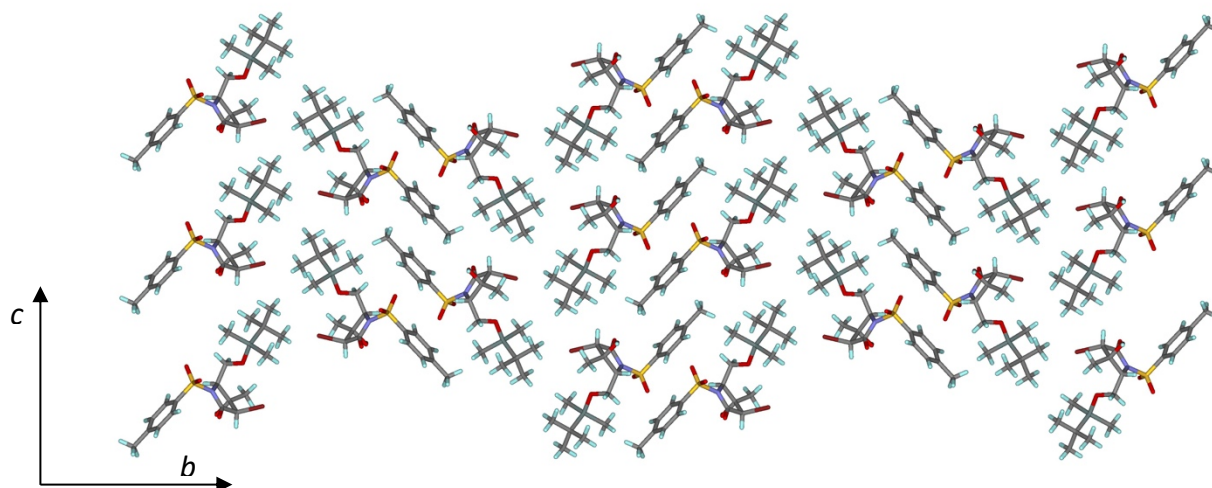

**Figure S5.** Three-dimensional supramolecular architecture of **12** viewed along the *a*-axis direction.

### X-Ray Crystallography:

A crystal mounted on a diffractometer was collected data at 95 K. The intensities of the reflections were collected by means of a Bruker APEX II CCD along with the D8 Diffractometer (30 KeV,  $\lambda = 0.41328 \text{ \AA}$ ), and equipped with an Oxford Cryosystems nitrogen open flow apparatus. The collection method involved  $0.5^\circ$  scans in Phi at  $-5^\circ$  in  $2\theta$ . Data integration down to  $0.82 \text{ \AA}$  resolution was carried out using SAINT V7.46 A (Bruker diffractometer, 2009) with reflection spot size optimisation. Absorption corrections were made with the program SADABS (Bruker diffractometer, 2009). The structure was solved by the direct methods procedure and refined by least-squares methods again  $F^2$  using SHELXS-97 and SHELXL-97 (Sheldrick, 2008). Non-hydrogen atoms were refined anisotropically, and hydrogen atoms were allowed to ride on the respective atoms. Crystal data as well as details of data collection and refinement are summarized in Table 1, while geometric parameters and Hydrogen-bond parameters are shown in Tables 2 and 3. The Ortep plots produced with SHELXL-97 program, and the other drawings were produced with Accelrys DS Visualizer 2.0 (Accelrys, 2007).

**Table S10.** Experimental details for **12**.

| Crystal data                                                                                |                                                               |
|---------------------------------------------------------------------------------------------|---------------------------------------------------------------|
| Identification code                                                                         | <b>12 (CCDC 1881929)</b>                                      |
| Chemical formula                                                                            | C <sub>19</sub> H <sub>30</sub> BrNO <sub>5</sub> SSi         |
| <i>M<sub>r</sub></i>                                                                        | 492.50                                                        |
| Crystal system, space group                                                                 | Monoclinic, <i>P2<sub>1</sub>/n</i>                           |
| Temperature (K)                                                                             | 95                                                            |
| <i>a</i> , <i>b</i> , <i>c</i> (Å)                                                          | 6.7083 (6), 34.703 (3), 10.1768 (9)                           |
| $\beta$ (°)                                                                                 | 106.087 (2)                                                   |
| <i>V</i> (Å <sup>3</sup> )                                                                  | 2276.4 (4)                                                    |
| <i>Z</i>                                                                                    | 4                                                             |
| Radiation type                                                                              | Synchrotron, $\lambda = 0.41328$ Å                            |
| $\mu$ (mm <sup>-1</sup> )                                                                   | 1.06                                                          |
| Crystal size (mm)                                                                           | 0.12 × 0.07 × 0.03                                            |
| Data collection                                                                             |                                                               |
| Diffractometer                                                                              | Bruker D8 goniometer with CCD area detector<br>diffractometer |
| Absorption correction                                                                       | Multi-scan<br><i>SADABS</i> (Sheldrick, 2009)                 |
| <i>T<sub>min</sub></i> , <i>T<sub>max</sub></i>                                             | 0.883, 0.969                                                  |
| No. of measured, independent and observed [ <i>I</i> > 2 $\sigma$ ( <i>I</i> )] reflections | 37474, 4171, 3825                                             |
| <i>R<sub>int</sub></i>                                                                      | 0.063                                                         |
| Refinement                                                                                  |                                                               |

|                                                             |                                                                        |
|-------------------------------------------------------------|------------------------------------------------------------------------|
| $R[F^2 > 2\sigma(F^2)], wR(F^2), S$                         | 0.036, 0.083, 1.05                                                     |
| No. of reflections                                          | 4171                                                                   |
| No. of parameters                                           | 257                                                                    |
| No. of restraints                                           | 0                                                                      |
| H-atom treatment                                            | H atoms treated by a mixture of independent and constrained refinement |
| $\Delta\rho_{\max}, \Delta\rho_{\min}$ (e Å <sup>-3</sup> ) | 0.43, -0.47                                                            |

Computer programs: *APEX2* v2009.3.0 (Bruker-AXS, 2009), *SAINT* 7.46A (Bruker-AXS, 2009), *SHELXS97* (Sheldrick, 2008), *SHELXL97* (Sheldrick, 2008), Bruker *SHELXTL*.

**Table S11.** Selected geometric parameters (Å°) for **12**.

|        |           |          |           |
|--------|-----------|----------|-----------|
| Br1—C2 | 1.940 (3) | C8—C9    | 1.5292    |
| S1—O4  | 1.425 (2) | C8—C10   | 1.532 (4) |
| S1—O5  | 1.427 (2) | C8—C11   | 1.534 (4) |
| S1—N1  | 1.679 (2) | C9—H9A   | 0.9594    |
| S1—C13 | 1.752 (3) | C9—H9B   | 0.9720    |
| Si1—O3 | 1.652 (2) | C9—H9C   | 0.9511    |
| Si1—C7 | 1.857 (2) | C10—H10A | 0.9800    |
| Si1—C6 | 1.860 (4) | C10—H10B | 0.9800    |
| Si1—C8 | 1.875 (2) | C10—H10C | 0.9800    |
| O1—C1  | 1.212 (3) | C11—H11A | 0.9800    |
| O2—C3  | 1.430 (3) | C11—H11B | 0.9800    |
| O2—H2O | 0.74 (3)  | C11—H11C | 0.9800    |

|           |             |            |             |
|-----------|-------------|------------|-------------|
| O3—C5     | 1.415 (3)   | C12—H12A   | 0.9800      |
| N1—C1     | 1.375 (3)   | C12—H12B   | 0.9800      |
| N1—C4     | 1.490 (3)   | C12—H12C   | 0.9800      |
| C1—C2     | 1.510 (3)   | C13—C18    | 1.385 (4)   |
| C2—C3     | 1.541 (4)   | C13—C14    | 1.390 (4)   |
| C2—H2A    | 1.0000      | C14—C15    | 1.377 (4)   |
| C3—C12    | 1.515 (4)   | C14—H14A   | 0.9500      |
| C3—C4     | 1.551 (4)   | C15—C16    | 1.385 (5)   |
| C4—C5     | 1.514 (4)   | C15—H15A   | 0.9500      |
| C4—H4A    | 1.0000      | C16—C17    | 1.382 (4)   |
| C5—H5A    | 0.9900      | C16—C19    | 1.506 (4)   |
| C5—H5B    | 0.9900      | C17—C18    | 1.383 (4)   |
| C6—H6A    | 0.9800      | C17—H17A   | 0.9500      |
| C6—H6B    | 0.9800      | C18—H18A   | 0.9500      |
| C6—H6C    | 0.9800      | C19—H19C   | 0.9800      |
| C7—H7A    | 0.9800      | C19—H19D   | 0.9800      |
| C7—H7B    | 0.9800      | C19—H19A   | 0.9800      |
| C7—H7C    | 0.9800      |            |             |
| O4—S1—O5  | 120.31 (12) | H7B—C7—H7C | 109.5       |
| O4—S1—N1  | 107.70 (11) | C9—C8—C10  | 108.19 (19) |
| O5—S1—N1  | 104.14 (11) | C9—C8—C11  | 108.7 (2)   |
| O4—S1—C13 | 109.84 (13) | C10—C8—C11 | 108.9 (3)   |



|            |             |               |            |
|------------|-------------|---------------|------------|
| O5—S1—C13  | 109.25 (12) | C9—C8—Si1     | 109.54 (7) |
| N1—S1—C13  | 104.29 (12) | C10—C8—Si1    | 111.0 (2)  |
| O3—Si1—C7  | 109.26 (14) | C11—C8—Si1    | 110.4 (2)  |
| O3—Si1—C6  | 104.58 (16) | C8—C9—H9A     | 109.5      |
| C7—Si1—C6  | 111.52 (19) | C8—C9—H9B     | 109.3      |
| O3—Si1—C8  | 110.11 (11) | H9A—C9—H9B    | 111.7      |
| C7—Si1—C8  | 110.97 (12) | C8—C9—H9C     | 109.6      |
| C6—Si1—C8  | 110.22 (14) | H9A—C9—H9C    | 107.2      |
| C3—O2—H2O  | 109 (3)     | H9B—C9—H9C    | 109.5      |
| C5—O3—Si1  | 125.87 (18) | C8—C10—H10A   | 109.5      |
| C1—N1—C4   | 114.4 (2)   | C8—C10—H10B   | 109.5      |
| C1—N1—S1   | 121.17 (17) | H10A—C10—H10B | 109.5      |
| C4—N1—S1   | 123.58 (17) | C8—C10—H10C   | 109.5      |
| O1—C1—N1   | 125.9 (2)   | H10A—C10—H10C | 109.5      |
| O1—C1—C2   | 126.2 (2)   | H10B—C10—H10C | 109.5      |
| N1—C1—C2   | 107.8 (2)   | C8—C11—H11A   | 109.5      |
| C1—C2—C3   | 104.8 (2)   | C8—C11—H11B   | 109.5      |
| C1—C2—Br1  | 107.83 (16) | H11A—C11—H11B | 109.5      |
| C3—C2—Br1  | 117.73 (18) | C8—C11—H11C   | 109.5      |
| C1—C2—H2A  | 108.7       | H11A—C11—H11C | 109.5      |
| C3—C2—H2A  | 108.7       | H11B—C11—H11C | 109.5      |
| Br1—C2—H2A | 108.7       | C3—C12—H12A   | 109.5      |

|            |           |               |           |
|------------|-----------|---------------|-----------|
| O2—C3—C12  | 111.5 (2) | C3—C12—H12B   | 109.5     |
| O2—C3—C2   | 101.3 (2) | H12A—C12—H12B | 109.5     |
| C12—C3—C2  | 115.8 (2) | C3—C12—H12C   | 109.5     |
| O2—C3—C4   | 107.2 (2) | H12A—C12—H12C | 109.5     |
| C12—C3—C4  | 114.6 (2) | H12B—C12—H12C | 109.5     |
| C2—C3—C4   | 105.2 (2) | C18—C13—C14   | 121.0 (3) |
| N1—C4—C5   | 112.6 (2) | C18—C13—S1    | 120.8 (2) |
| N1—C4—C3   | 102.5 (2) | C14—C13—S1    | 118.2 (2) |
| C5—C4—C3   | 117.8 (2) | C15—C14—C13   | 119.1 (3) |
| N1—C4—H4A  | 107.8     | C15—C14—H14A  | 120.5     |
| C5—C4—H4A  | 107.8     | C13—C14—H14A  | 120.5     |
| C3—C4—H4A  | 107.8     | C14—C15—C16   | 121.1 (3) |
| O3—C5—C4   | 111.3 (2) | C14—C15—H15A  | 119.4     |
| O3—C5—H5A  | 109.4     | C16—C15—H15A  | 119.4     |
| C4—C5—H5A  | 109.4     | C17—C16—C15   | 118.8 (3) |
| O3—C5—H5B  | 109.4     | C17—C16—C19   | 121.4 (3) |
| C4—C5—H5B  | 109.4     | C15—C16—C19   | 119.8 (3) |
| H5A—C5—H5B | 108.0     | C16—C17—C18   | 121.5 (3) |
| Si1—C6—H6A | 109.5     | C16—C17—H17A  | 119.2     |
| Si1—C6—H6B | 109.5     | C18—C17—H17A  | 119.2     |
| H6A—C6—H6B | 109.5     | C17—C18—C13   | 118.6 (3) |
| Si1—C6—H6C | 109.5     | C17—C18—H18A  | 120.7     |

|              |              |               |              |
|--------------|--------------|---------------|--------------|
| H6A—C6—H6C   | 109.5        | C13—C18—H18A  | 120.7        |
| H6B—C6—H6C   | 109.5        | C16—C19—H19C  | 109.5        |
| Si1—C7—H7A   | 109.5        | C16—C19—H19D  | 109.5        |
| Si1—C7—H7B   | 109.5        | H19C—C19—H19D | 109.5        |
| H7A—C7—H7B   | 109.5        | C16—C19—H19A  | 109.5        |
| Si1—C7—H7C   | 109.5        | H19C—C19—H19A | 109.5        |
| H7A—C7—H7C   | 109.5        | H19D—C19—H19A | 109.5        |
| C7—Si1—O3—C5 | 39.3 (3)     | C12—C3—C4—C5  | -23.8 (3)    |
| C6—Si1—O3—C5 | 158.8 (2)    | C2—C3—C4—C5   | 104.5 (2)    |
| C8—Si1—O3—C5 | -82.8 (2)    | Si1—O3—C5—C4  | -146.18 (19) |
| O4—S1—N1—C1  | 53.5 (2)     | N1—C4—C5—O3   | 57.6 (3)     |
| O5—S1—N1—C1  | -177.68 (19) | C3—C4—C5—O3   | -61.3 (3)    |
| C13—S1—N1—C1 | -63.2 (2)    | O3—Si1—C8—C9  | -59.79 (10)  |
| O4—S1—N1—C4  | -138.0 (2)   | C7—Si1—C8—C9  | 179.12 (14)  |
| O5—S1—N1—C4  | -9.1 (2)     | C6—Si1—C8—C9  | 55.08 (16)   |
| C13—S1—N1—C4 | 105.4 (2)    | O3—Si1—C8—C10 | 59.6 (2)     |
| C4—N1—C1—O1  | -173.4 (2)   | C7—Si1—C8—C10 | -61.5 (3)    |
| S1—N1—C1—O1  | -3.9 (3)     | C6—Si1—C8—C10 | 174.5 (2)    |
| C4—N1—C1—C2  | 5.2 (3)      | O3—Si1—C8—C11 | -179.5 (2)   |
| S1—N1—C1—C2  | 174.76 (17)  | C7—Si1—C8—C11 | 59.5 (3)     |
| O1—C1—C2—C3  | 160.9 (2)    | C6—Si1—C8—C11 | -64.6 (3)    |
| N1—C1—C2—C3  | -17.8 (3)    | O4—S1—C13—C18 | -8.2 (3)     |

|               |              |                 |            |
|---------------|--------------|-----------------|------------|
| O1—C1—C2—Br1  | -72.9 (3)    | O5—S1—C13—C18   | -142.2 (2) |
| N1—C1—C2—Br1  | 108.43 (19)  | N1—S1—C13—C18   | 106.9 (2)  |
| C1—C2—C3—O2   | -88.5 (2)    | O4—S1—C13—C14   | 171.2 (2)  |
| Br1—C2—C3—O2  | 151.72 (17)  | O5—S1—C13—C14   | 37.2 (3)   |
| C1—C2—C3—C12  | 150.7 (2)    | N1—S1—C13—C14   | -73.6 (2)  |
| Br1—C2—C3—C12 | 30.9 (3)     | C18—C13—C14—C15 | -1.1 (4)   |
| C1—C2—C3—C4   | 23.1 (3)     | S1—C13—C14—C15  | 179.4 (2)  |
| Br1—C2—C3—C4  | -96.7 (2)    | C13—C14—C15—C16 | 0.7 (4)    |
| C1—N1—C4—C5   | -118.1 (2)   | C14—C15—C16—C17 | 0.2 (4)    |
| S1—N1—C4—C5   | 72.6 (3)     | C14—C15—C16—C19 | -179.8 (3) |
| C1—N1—C4—C3   | 9.4 (3)      | C15—C16—C17—C18 | -0.7 (4)   |
| S1—N1—C4—C3   | -159.82 (17) | C19—C16—C17—C18 | 179.3 (3)  |
| O2—C3—C4—N1   | 87.6 (2)     | C16—C17—C18—C13 | 0.3 (4)    |
| C12—C3—C4—N1  | -148.0 (2)   | C14—C13—C18—C17 | 0.7 (4)    |
| C2—C3—C4—N1   | -19.6 (2)    | S1—C13—C18—C17  | -179.9 (2) |
| O2—C3—C4—C5   | -148.2 (2)   |                 |            |

**Table S12.** Hydrogen bond parameters for **12**.

| <i>D</i> —H··· <i>A</i>  | <i>D</i> —H (Å) | H··· <i>A</i> (Å) | <i>D</i> ··· <i>A</i> (Å) | <i>D</i> —H··· <i>A</i> (°) |
|--------------------------|-----------------|-------------------|---------------------------|-----------------------------|
| O2—H2O···O1 <sup>i</sup> | 0.74 (3)        | 2.07 (3)          | 2.795 (3)                 | 167 (4)                     |

Symmetry code(s): (i)  $x-1, y, z$ .

**Crystal data for 16 (racemic); CCDC 1881767**

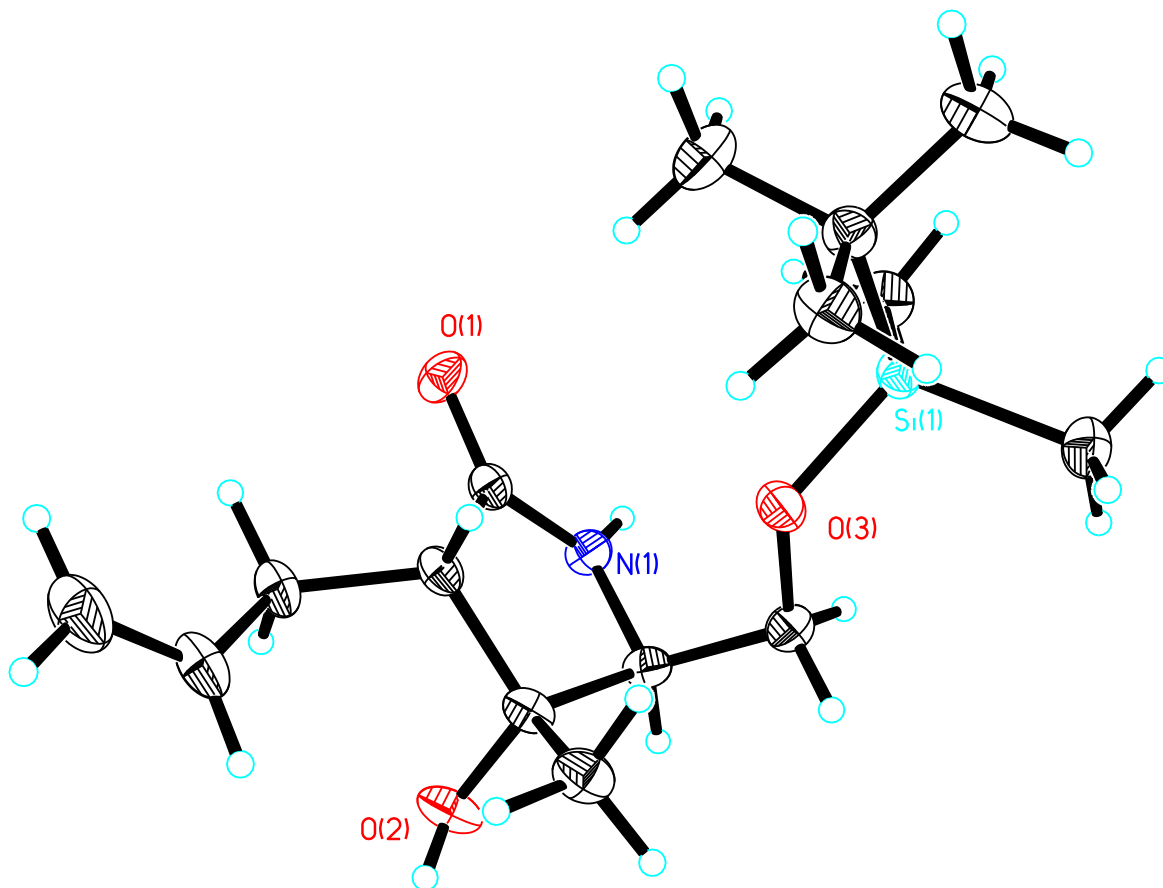

**Figure S6.** Perspective views of **12**

**Experimental Section:**

A colorless block crystal with dimensions 0.39 x 0.18 x 0.12 mm was mounted on a Nylon loop using very small amount of paratone oil.

Data were collected using a Bruker CCD (charge coupled device) based diffractometer equipped with an Oxford Cryostream low-temperature apparatus operating at 100 K.

Data were measured using omega and phi scans of 0.5° per frame for 30 s. The total number of images was based on results from the program COSMO where redundancy was expected to be 4.0 and completeness of 100% out to 0.83 Å. Cell parameters were retrieved using APEX II software and refined using SAINT on all observed reflections.

Data reduction was performed using the SAINT software which corrects for Lp. Scaling and absorption corrections were applied using SADABS multi-scan technique, supplied by George Sheldrick. The structures are solved by the direct method using the SHELXS-97 program and refined by least squares method on  $F^2$ , SHELXL- 97, which are incorporated in SHELXTL-PC V 6.10.

The structure was solved in the space group  $P2_1/c$  (# 14). All non-hydrogen atoms are refined anisotropically. Hydrogen atoms were found by difference Fourier methods and refined isotropically. The crystal used for the diffraction study showed no decomposition during data collection. All drawings are done at 50% ellipsoids.

**Table S13.** Crystal data and structure refinement for **16**.

|                      |                                                     |                              |
|----------------------|-----------------------------------------------------|------------------------------|
| Identification code  | <b>16 (CCDC 1881767)</b>                            |                              |
| Empirical formula    | C <sub>15</sub> H <sub>29</sub> N O <sub>3</sub> Si |                              |
| Formula weight       | 299.48                                              |                              |
| Temperature          | 100(2) K                                            |                              |
| Wavelength           | 0.71073 Å                                           |                              |
| Crystal system       | Monoclinic                                          |                              |
| Space group          | P 21/c                                              |                              |
| Unit cell dimensions | a = 13.2284(3) Å                                    | $\alpha = 90^\circ$ .        |
|                      | b = 12.1847(3) Å                                    | $\beta = 116.5650(10)^\circ$ |
|                      | c = 12.2126(3) Å                                    | $\gamma = 90^\circ$ .        |
| Volume               | 1760.66(7) Å <sup>3</sup>                           |                              |

|                                   |                                             |
|-----------------------------------|---------------------------------------------|
| Z                                 | 4                                           |
| Density (calculated)              | 1.130 Mg/m <sup>3</sup>                     |
| Absorption coefficient            | 0.140 mm <sup>-1</sup>                      |
| F(000)                            | 656                                         |
| Crystal size                      | 0.39 x 0.18 x 0.12 mm <sup>3</sup>          |
| Theta range for data collection   | 1.72 to 30.58°.                             |
| Index ranges                      | -18<=h<=18, -17<=k<=17, -17<=l<=17          |
| Reflections collected             | 26464                                       |
| Independent reflections           | 5385 [R(int) = 0.0531]                      |
| Completeness to theta = 25.00°    | 100.0 %                                     |
| Absorption correction             | Semi-empirical from equivalents             |
| Max. and min. transmission        | 0.9829 and 0.9469                           |
| Refinement method                 | Full-matrix least-squares on F <sup>2</sup> |
| Data / restraints / parameters    | 5385 / 0 / 297                              |
| Goodness-of-fit on F <sup>2</sup> | 1.042                                       |
| Final R indices [I>2sigma(I)]     | R1 = 0.0420, wR2 = 0.0954                   |
| R indices (all data)              | R1 = 0.0663, wR2 = 0.1064                   |
| Largest diff. peak and hole       | 0.416 and -0.262 e.Å <sup>-3</sup>          |

---

**Table S14.** Atomic coordinates (  $\times 10^4$ ) and equivalent isotropic displacement parameters ( $\text{\AA}^2 \times 10^3$ ) for **16**. U(eq) is defined as one third of the trace of the orthogonalized  $U_{ij}$  tensor.

|       | x       | y        | z       | U(eq) |
|-------|---------|----------|---------|-------|
| Si(1) | 6649(1) | -1197(1) | 7455(1) | 21(1) |
| O(1)  | 9359(1) | 1334(1)  | 9999(1) | 25(1) |
| O(2)  | 9615(1) | 2171(1)  | 6733(1) | 29(1) |
| O(3)  | 7226(1) | -189(1)  | 7013(1) | 25(1) |
| N(1)  | 9498(1) | 444(1)   | 8428(1) | 21(1) |
| C(1)  | 9171(1) | 1270(1)  | 8909(1) | 20(1) |
| C(2)  | 8555(1) | 2124(1)  | 7932(1) | 19(1) |
| C(3)  | 8658(1) | 1686(1)  | 6788(1) | 21(1) |
| C(4)  | 8988(1) | 456(1)   | 7098(1) | 20(1) |
| C(5)  | 9062(1) | 3265(1)  | 8386(1) | 24(1) |
| C(6)  | 8442(1) | 4190(1)  | 7545(2) | 30(1) |
| C(7)  | 8084(2) | 5077(1)  | 7876(2) | 42(1) |
| C(8)  | 7585(1) | 1851(1)  | 5598(1) | 27(1) |
| C(9)  | 8049(1) | -395(1)  | 6583(1) | 24(1) |
| C(10) | 7741(1) | -1918(1) | 8812(2) | 32(1) |
| C(11) | 5990(1) | -2195(1) | 6172(2) | 32(1) |
| C(12) | 5566(1) | -500(1)  | 7819(1) | 24(1) |
| C(13) | 6155(2) | 159(2)   | 9009(2) | 36(1) |



|       |         |          |         |       |
|-------|---------|----------|---------|-------|
| C(14) | 4796(1) | -1368(1) | 7972(2) | 34(1) |
| C(15) | 4842(1) | 283(1)   | 6775(2) | 30(1) |

---

**Table 15.** Bond lengths [Å] and angles [°] for **16**.

---

|             |            |
|-------------|------------|
| Si(1)-O(3)  | 1.6574(10) |
| Si(1)-C(10) | 1.8611(15) |
| Si(1)-C(11) | 1.8633(15) |
| Si(1)-C(12) | 1.8821(14) |
| O(1)-C(1)   | 1.2426(15) |
| O(2)-C(3)   | 1.4256(15) |
| O(2)-H(2)   | 0.810(18)  |
| O(3)-C(9)   | 1.4274(16) |
| N(1)-C(1)   | 1.3307(16) |
| N(1)-C(4)   | 1.4536(16) |
| N(1)-H(1)   | 0.833(16)  |
| C(1)-C(2)   | 1.5165(17) |
| C(2)-C(5)   | 1.5353(18) |
| C(2)-C(3)   | 1.5569(18) |
| C(2)-H(2A)  | 0.981(14)  |
| C(3)-C(8)   | 1.5244(18) |
| C(3)-C(4)   | 1.5585(18) |
| C(4)-C(9)   | 1.5216(19) |

|              |            |
|--------------|------------|
| C(4)-H(4)    | 0.957(14)  |
| C(5)-C(6)    | 1.4992(19) |
| C(5)-H(5A)   | 0.955(17)  |
| C(5)-H(5B)   | 1.019(15)  |
| C(6)-C(7)    | 1.313(2)   |
| C(6)-H(6)    | 0.966(19)  |
| C(7)-H(7A)   | 0.99(2)    |
| C(7)-H(7B)   | 0.97(2)    |
| C(8)-H(8A)   | 0.986(16)  |
| C(8)-H(8B)   | 0.986(17)  |
| C(8)-H(8C)   | 1.015(18)  |
| C(9)-H(9A)   | 0.987(16)  |
| C(9)-H(9B)   | 1.004(15)  |
| C(10)-H(10A) | 0.962(19)  |
| C(10)-H(10B) | 0.964(19)  |
| C(10)-H(10C) | 0.988(19)  |
| C(11)-H(11A) | 0.990(19)  |
| C(11)-H(11B) | 1.00(2)    |
| C(11)-H(11C) | 0.99(2)    |
| C(12)-C(13)  | 1.534(2)   |
| C(12)-C(15)  | 1.5362(19) |
| C(12)-C(14)  | 1.537(2)   |

|                   |            |
|-------------------|------------|
| C(13)-H(13A)      | 0.989(19)  |
| C(13)-H(13B)      | 0.979(18)  |
| C(13)-H(13C)      | 0.974(19)  |
| C(14)-H(14A)      | 0.950(19)  |
| C(14)-H(14B)      | 0.988(19)  |
| C(14)-H(14C)      | 1.008(19)  |
| C(15)-H(15A)      | 0.980(18)  |
| C(15)-H(15B)      | 0.972(17)  |
| C(15)-H(15C)      | 0.999(18)  |
| O(3)-Si(1)-C(10)  | 110.66(7)  |
| O(3)-Si(1)-C(11)  | 108.68(6)  |
| C(10)-Si(1)-C(11) | 109.03(8)  |
| O(3)-Si(1)-C(12)  | 104.61(5)  |
| C(10)-Si(1)-C(12) | 111.84(7)  |
| C(11)-Si(1)-C(12) | 111.93(7)  |
| C(3)-O(2)-H(2)    | 110.7(12)  |
| C(9)-O(3)-Si(1)   | 121.84(8)  |
| C(1)-N(1)-C(4)    | 113.94(10) |
| C(1)-N(1)-H(1)    | 119.8(10)  |
| C(4)-N(1)-H(1)    | 124.5(11)  |
| O(1)-C(1)-N(1)    | 124.83(12) |
| O(1)-C(1)-C(2)    | 125.43(11) |

|                 |            |
|-----------------|------------|
| N(1)-C(1)-C(2)  | 109.74(11) |
| C(1)-C(2)-C(5)  | 110.04(10) |
| C(1)-C(2)-C(3)  | 103.80(10) |
| C(5)-C(2)-C(3)  | 115.82(11) |
| C(1)-C(2)-H(2A) | 106.8(8)   |
| C(5)-C(2)-H(2A) | 110.8(8)   |
| C(3)-C(2)-H(2A) | 109.0(8)   |
| O(2)-C(3)-C(8)  | 111.56(10) |
| O(2)-C(3)-C(2)  | 109.64(10) |
| C(8)-C(3)-C(2)  | 113.12(11) |
| O(2)-C(3)-C(4)  | 104.58(10) |
| C(8)-C(3)-C(4)  | 113.50(11) |
| C(2)-C(3)-C(4)  | 103.85(9)  |
| N(1)-C(4)-C(9)  | 109.85(10) |
| N(1)-C(4)-C(3)  | 102.72(10) |
| C(9)-C(4)-C(3)  | 117.81(11) |
| N(1)-C(4)-H(4)  | 110.7(8)   |
| C(9)-C(4)-H(4)  | 108.7(8)   |
| C(3)-C(4)-H(4)  | 106.8(8)   |
| C(6)-C(5)-C(2)  | 114.63(11) |
| C(6)-C(5)-H(5A) | 108.9(10)  |
| C(2)-C(5)-H(5A) | 107.4(10)  |

|                    |            |
|--------------------|------------|
| C(6)-C(5)-H(5B)    | 109.1(9)   |
| C(2)-C(5)-H(5B)    | 110.4(9)   |
| H(5A)-C(5)-H(5B)   | 105.9(13)  |
| C(7)-C(6)-C(5)     | 124.74(16) |
| C(7)-C(6)-H(6)     | 119.0(11)  |
| C(5)-C(6)-H(6)     | 116.2(11)  |
| C(6)-C(7)-H(7A)    | 122.6(11)  |
| C(6)-C(7)-H(7B)    | 120.2(12)  |
| H(7A)-C(7)-H(7B)   | 117.1(17)  |
| C(3)-C(8)-H(8A)    | 110.3(9)   |
| C(3)-C(8)-H(8B)    | 109.3(9)   |
| H(8A)-C(8)-H(8B)   | 107.8(13)  |
| C(3)-C(8)-H(8C)    | 110.3(10)  |
| H(8A)-C(8)-H(8C)   | 109.2(13)  |
| H(8B)-C(8)-H(8C)   | 109.9(13)  |
| O(3)-C(9)-C(4)     | 110.17(10) |
| O(3)-C(9)-H(9A)    | 109.6(9)   |
| C(4)-C(9)-H(9A)    | 108.8(9)   |
| O(3)-C(9)-H(9B)    | 113.0(9)   |
| C(4)-C(9)-H(9B)    | 105.0(9)   |
| H(9A)-C(9)-H(9B)   | 110.1(13)  |
| Si(1)-C(10)-H(10A) | 111.7(11)  |

|                     |            |
|---------------------|------------|
| Si(1)-C(10)-H(10B)  | 112.6(11)  |
| H(10A)-C(10)-H(10B) | 105.8(15)  |
| Si(1)-C(10)-H(10C)  | 111.6(10)  |
| H(10A)-C(10)-H(10C) | 108.4(15)  |
| H(10B)-C(10)-H(10C) | 106.3(15)  |
| Si(1)-C(11)-H(11A)  | 109.4(11)  |
| Si(1)-C(11)-H(11B)  | 111.1(12)  |
| H(11A)-C(11)-H(11B) | 110.1(16)  |
| Si(1)-C(11)-H(11C)  | 110.2(12)  |
| H(11A)-C(11)-H(11C) | 108.2(16)  |
| H(11B)-C(11)-H(11C) | 107.9(16)  |
| C(13)-C(12)-C(15)   | 109.00(12) |
| C(13)-C(12)-C(14)   | 109.17(13) |
| C(15)-C(12)-C(14)   | 109.15(12) |
| C(13)-C(12)-Si(1)   | 110.01(10) |
| C(15)-C(12)-Si(1)   | 109.99(9)  |
| C(14)-C(12)-Si(1)   | 109.50(10) |
| C(12)-C(13)-H(13A)  | 110.9(10)  |
| C(12)-C(13)-H(13B)  | 110.9(10)  |
| H(13A)-C(13)-H(13B) | 107.9(14)  |
| C(12)-C(13)-H(13C)  | 110.3(11)  |
| H(13A)-C(13)-H(13C) | 107.4(15)  |

|                     |           |
|---------------------|-----------|
| H(13B)-C(13)-H(13C) | 109.4(15) |
| C(12)-C(14)-H(14A)  | 112.7(11) |
| C(12)-C(14)-H(14B)  | 113.6(10) |
| H(14A)-C(14)-H(14B) | 106.7(15) |
| C(12)-C(14)-H(14C)  | 110.5(11) |
| H(14A)-C(14)-H(14C) | 106.6(14) |
| H(14B)-C(14)-H(14C) | 106.3(15) |
| C(12)-C(15)-H(15A)  | 111.6(10) |
| C(12)-C(15)-H(15B)  | 112.0(10) |
| H(15A)-C(15)-H(15B) | 106.8(14) |
| C(12)-C(15)-H(15C)  | 110.3(10) |
| H(15A)-C(15)-H(15C) | 107.8(14) |
| H(15B)-C(15)-H(15C) | 108.2(14) |

---

Symmetry transformations used to generate equivalent atoms:

**Table S16.** Anisotropic displacement parameters ( $\text{\AA}^2 \times 10^3$ ) for **16**. The anisotropic displacement factor exponent takes the form:  $-2\pi^2 [h^2 a^{*2} U^{11} + \dots + 2 h k a^* b^* U^{12}]$

|       | U11   | U22   | U33   | U23   | U13   | U12   |
|-------|-------|-------|-------|-------|-------|-------|
| Si(1) | 23(1) | 16(1) | 21(1) | 0(1)  | 10(1) | -1(1) |
| O(1)  | 34(1) | 21(1) | 20(1) | 1(1)  | 10(1) | 8(1)  |
| O(2)  | 21(1) | 36(1) | 30(1) | 13(1) | 12(1) | -1(1) |
| O(3)  | 28(1) | 19(1) | 34(1) | -1(1) | 19(1) | -2(1) |
| N(1)  | 25(1) | 18(1) | 19(1) | 3(1)  | 9(1)  | 6(1)  |
| C(1)  | 19(1) | 18(1) | 22(1) | 1(1)  | 9(1)  | 0(1)  |
| C(2)  | 18(1) | 15(1) | 24(1) | 4(1)  | 9(1)  | 2(1)  |
| C(3)  | 19(1) | 22(1) | 22(1) | 5(1)  | 10(1) | 0(1)  |
| C(4)  | 22(1) | 22(1) | 19(1) | 2(1)  | 11(1) | 3(1)  |
| C(5)  | 22(1) | 17(1) | 32(1) | 2(1)  | 12(1) | 0(1)  |
| C(6)  | 26(1) | 20(1) | 42(1) | 7(1)  | 15(1) | 0(1)  |
| C(7)  | 44(1) | 24(1) | 65(1) | 10(1) | 31(1) | 7(1)  |
| C(8)  | 22(1) | 30(1) | 24(1) | 8(1)  | 7(1)  | 2(1)  |
| C(9)  | 28(1) | 23(1) | 25(1) | -3(1) | 15(1) | 0(1)  |
| C(10) | 30(1) | 31(1) | 31(1) | 6(1)  | 11(1) | 6(1)  |
| C(11) | 40(1) | 24(1) | 32(1) | -5(1) | 16(1) | -6(1) |
| C(12) | 25(1) | 23(1) | 23(1) | 2(1)  | 10(1) | 1(1)  |
| C(13) | 39(1) | 38(1) | 32(1) | -9(1) | 16(1) | 4(1)  |
| C(14) | 30(1) | 36(1) | 39(1) | 11(1) | 18(1) | 1(1)  |



C(15) 30(1) 26(1) 35(1) 6(1) 14(1) 6(1)

---

**Table S17.** Hydrogen coordinates (  $\times 10^4$ ) and isotropic displacement parameters ( $\text{\AA}^2 \times 10^3$ ) for **16**.

|        | x        | y         | z        | U(eq) |
|--------|----------|-----------|----------|-------|
| H(2)   | 9419(14) | 2591(15)  | 6161(16) | 35(5) |
| H(1)   | 9828(13) | -94(13)   | 8861(14) | 24(4) |
| H(2A)  | 7760(12) | 2100(11)  | 7770(12) | 13(3) |
| H(4)   | 9538(11) | 292(11)   | 6815(12) | 15(3) |
| H(5A)  | 9822(14) | 3253(13)  | 8492(14) | 31(4) |
| H(5B)  | 9114(13) | 3415(13)  | 9231(14) | 26(4) |
| H(6)   | 8341(16) | 4132(15)  | 6713(18) | 48(5) |
| H(7A)  | 7687(16) | 5678(17)  | 7298(17) | 52(5) |
| H(7B)  | 8229(17) | 5176(17)  | 8720(20) | 57(6) |
| H(8A)  | 6927(14) | 1547(13)  | 5671(14) | 29(4) |
| H(8B)  | 7453(13) | 2644(14)  | 5430(14) | 32(4) |
| H(8C)  | 7658(15) | 1475(14)  | 4894(16) | 39(5) |
| H(9A)  | 7690(13) | -352(13)  | 5681(15) | 28(4) |
| H(9B)  | 8440(13) | -1121(13) | 6864(14) | 26(4) |
| H(10A) | 8148(16) | -1417(15) | 9475(17) | 44(5) |
| H(10B) | 8304(16) | -2274(16) | 8639(16) | 48(5) |

|        |          |           |          |       |
|--------|----------|-----------|----------|-------|
| H(10C) | 7404(15) | -2497(16) | 9112(16) | 44(5) |
| H(11A) | 6575(16) | -2484(16) | 5952(17) | 46(5) |
| H(11B) | 5366(17) | -1844(17) | 5441(18) | 58(6) |
| H(11C) | 5666(17) | -2819(18) | 6425(18) | 62(6) |
| H(13A) | 6610(15) | -328(15)  | 9704(17) | 43(5) |
| H(13B) | 5601(15) | 534(15)   | 9204(15) | 41(5) |
| H(13C) | 6667(16) | 698(16)   | 8939(16) | 45(5) |
| H(14A) | 5204(15) | -1884(15) | 8599(16) | 39(5) |
| H(14B) | 4353(15) | -1796(15) | 7220(17) | 42(5) |
| H(14C) | 4231(16) | -1010(15) | 8201(17) | 48(5) |
| H(15A) | 5298(15) | 874(15)   | 6677(15) | 38(5) |
| H(15B) | 4251(14) | 632(14)   | 6918(15) | 35(4) |
| H(15C) | 4477(14) | -124(15)  | 5983(16) | 42(5) |

---

**Table S18.** Torsion angles [°] for **16**.

---

|                       |             |
|-----------------------|-------------|
| C(10)-Si(1)-O(3)-C(9) | 63.33(11)   |
| C(11)-Si(1)-O(3)-C(9) | -56.36(12)  |
| C(12)-Si(1)-O(3)-C(9) | -176.07(10) |
| C(4)-N(1)-C(1)-O(1)   | 168.56(12)  |
| C(4)-N(1)-C(1)-C(2)   | -12.37(14)  |
| O(1)-C(1)-C(2)-C(5)   | 50.36(17)   |
| N(1)-C(1)-C(2)-C(5)   | -128.71(12) |
| O(1)-C(1)-C(2)-C(3)   | 174.89(12)  |
| N(1)-C(1)-C(2)-C(3)   | -4.17(13)   |
| C(1)-C(2)-C(3)-O(2)   | -94.11(11)  |
| C(5)-C(2)-C(3)-O(2)   | 26.61(14)   |
| C(1)-C(2)-C(3)-C(8)   | 140.68(11)  |
| C(5)-C(2)-C(3)-C(8)   | -98.60(13)  |
| C(1)-C(2)-C(3)-C(4)   | 17.19(12)   |
| C(5)-C(2)-C(3)-C(4)   | 137.91(11)  |
| C(1)-N(1)-C(4)-C(9)   | -103.02(13) |
| C(1)-N(1)-C(4)-C(3)   | 23.13(13)   |
| O(2)-C(3)-C(4)-N(1)   | 91.45(11)   |
| C(8)-C(3)-C(4)-N(1)   | -146.74(11) |
| C(2)-C(3)-C(4)-N(1)   | -23.49(12)  |

|                         |             |
|-------------------------|-------------|
| O(2)-C(3)-C(4)-C(9)     | -147.71(11) |
| C(8)-C(3)-C(4)-C(9)     | -25.90(16)  |
| C(2)-C(3)-C(4)-C(9)     | 97.34(12)   |
| C(1)-C(2)-C(5)-C(6)     | -174.04(11) |
| C(3)-C(2)-C(5)-C(6)     | 68.67(15)   |
| C(2)-C(5)-C(6)-C(7)     | 127.92(16)  |
| Si(1)-O(3)-C(9)-C(4)    | -138.58(9)  |
| N(1)-C(4)-C(9)-O(3)     | 57.25(14)   |
| C(3)-C(4)-C(9)-O(3)     | -59.82(15)  |
| O(3)-Si(1)-C(12)-C(13)  | -72.18(11)  |
| C(10)-Si(1)-C(12)-C(13) | 47.63(13)   |
| C(11)-Si(1)-C(12)-C(13) | 170.32(11)  |
| O(3)-Si(1)-C(12)-C(15)  | 47.90(11)   |
| C(10)-Si(1)-C(12)-C(15) | 167.71(10)  |
| C(11)-Si(1)-C(12)-C(15) | -69.60(11)  |
| O(3)-Si(1)-C(12)-C(14)  | 167.84(10)  |
| C(10)-Si(1)-C(12)-C(14) | -72.34(11)  |
| C(11)-Si(1)-C(12)-C(14) | 50.34(12)   |

---

Symmetry transformations used to generate equivalent atoms:

**Table S19.** Hydrogen bonds for **16** [Å and °].

| D-H...A            | d(D-H)    | d(H...A)  | d(D...A)   | <(DHA)    |
|--------------------|-----------|-----------|------------|-----------|
| O(2)-H(2)...O(1)#1 | 0.810(18) | 1.907(19) | 2.6985(13) | 165.3(17) |
| N(1)-H(1)...O(1)#2 | 0.833(16) | 2.009(16) | 2.8412(14) | 176.3(15) |

---

Symmetry transformations used to generate equivalent atoms:

#1  $x, -y+1/2, z-1/2$  #2  $-x+2, -y, -z+2$

**Crystal data for 24 (racemic); CCDC 1879958**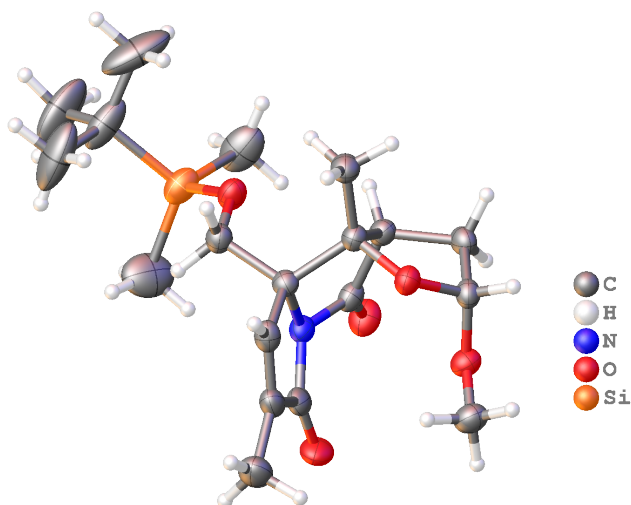

**Experimental.** Single colorless plate-shaped crystals of **24** were used as received. A suitable crystal (0.38×0.15×0.06) mm<sup>3</sup> was selected and mounted on a nylon loop with paratone oil on a Bruker APEX-II CCD diffractometer. The crystal was kept at  $T = 173(2)$  K during data collection. Using **Olex2**,<sup>6</sup> the structure was solved with the **ShelXT**<sup>9</sup> structure solution program, using the Intrinsic Phasing solution method. The model

| Compound                     | 24 (racemic)                                       |
|------------------------------|----------------------------------------------------|
| Formula                      | C <sub>19</sub> H <sub>31</sub> NO <sub>5</sub> Si |
| $D_{calc.}/\text{g cm}^{-3}$ | 1.215                                              |
| $\mu/\text{mm}^{-1}$         | 0.140                                              |
| Formula Weight               | 381.54                                             |
| Color                        | colorless                                          |
| Shape                        | plate                                              |
| Size/mm <sup>3</sup>         | 0.38×0.15×0.06                                     |
| $T/\text{K}$                 | 173(2)                                             |
| Crystal System               | triclinic                                          |
| Space Group                  | <i>P</i> -1                                        |
| $a/\text{\AA}$               | 7.1927(8)                                          |
| $b/\text{\AA}$               | 7.5787(8)                                          |
| $c/\text{\AA}$               | 21.102(2)                                          |
| $\alpha/^\circ$              | 83.7720(10)                                        |
| $\beta/^\circ$               | 82.5490(10)                                        |
| $\gamma/^\circ$              | 66.3970(10)                                        |
| $V/\text{\AA}^3$             | 1043.13(19)                                        |
| $Z$                          | 2                                                  |
| $Z'$                         | 1                                                  |

was refined with version of **XL**<sup>9</sup> using Least Squares minimisation.

**Crystal Data.** C<sub>19</sub>H<sub>31</sub>NO<sub>5</sub>Si,  $M_r = 381.54$ , triclinic, *P*-1 (No. 2),  $a = 7.1927(8) \text{ \AA}$ ,  $b = 7.5787(8) \text{ \AA}$ ,  $c = 21.102(2) \text{ \AA}$ ,  $\alpha = 83.7720(10)^\circ$ ,  $\beta = 82.5490(10)^\circ$ ,  $\gamma = 66.3970(10)^\circ$ ,  $V = 1043.13(19) \text{ \AA}^3$ ,  $T = 173(2) \text{ K}$ ,  $Z = 2$ ,  $Z' = 1$ ,  $\mu(\text{MoK}\alpha) = 0.140$ , 15883 reflections measured, 4145 unique ( $R_{int} = 0.0465$ ) which were used in all calculations. The final  $wR_2$  was 0.1580 (all data) and  $R_1$  was 0.0547 ( $I > 2(I)$ ).

|                       |              |
|-----------------------|--------------|
| Wavelength/Å          | 0.710730     |
| Radiation type        | MoK $\alpha$ |
| $\theta_{min}/^\circ$ | 1.950        |
| $\theta_{max}/^\circ$ | 26.142       |
| Measured Refl.        | 15883        |
| Independent Refl.     | 4145         |
| Reflections Used      | 2893         |
| $R_{int}$             | 0.0465       |
| Parameters            | 243          |
| Restraints            | 0            |
| Largest Peak          | 0.743        |
| Deepest Hole          | -0.271       |
| GooF                  | 1.063        |
| $wR_2$ (all data)     | 0.1580       |
| $wR_2$                | 0.1404       |
| $R_1$ (all data)      | 0.0796       |
| $R_1$                 | 0.0547       |

## Structure Quality Indicators

**Reflection:** d min (Mo) 0.81 |  $l/\sigma$  12.0 | Rint 4.65% | complete 100%

**Refinement:** Shift 0.000 | Max Peak 0.7 | Min Peak -0.3 | GooF 1.063

A colorless plate-shaped crystal with dimensions 0.38×0.15×0.06 mm<sup>3</sup> was mounted on a nylon loop with paratone oil. Data were collected using a Bruker APEX-II CCD diffractometer equipped with an Oxford Cryosystems low-temperature device, operating at  $T = 173(2)$  K.

Data were measured using  $\omega$  of  $-0.50^\circ$  per frame for 299.34 s using MoK $_{\alpha}$  radiation (sealed tube, 50 kV, 40 mA). The total number of runs and images was based on the strategy calculation from the program **COSMO**.<sup>7</sup> The actually achieved resolution was  $\theta = 26.142$ .

Cell parameters were retrieved using the **SAINT**<sup>8</sup> software and refined using **SAINT**<sup>8</sup> on 5215 reflections, 33% of the observed reflections. Data reduction was performed using the **SAINT**<sup>8</sup> software which corrects for Lorentz polarisation. The final completeness is 99.90 out to 26.142 in  $\theta$ . A multi-scan absorption correction was performed using SADABS-2014/5 (Bruker,2014/5) was used for absorption correction.  $wR_2$  was 0.0606 before and 0.0512 after correction. The Ratio of minimum to maximum transmission is 0.9066. The  $\lambda/2$  correction factor is 0.00150. The absorption coefficient  $\mu$  of this material is 0.140 mm<sup>-1</sup> at this wavelength ( $\lambda = 0.71073\text{\AA}$ ) and the minimum and maximum transmissions are 0.6757 and 0.7453. SADABS-2014/5 (Bruker,2014/5) was used for absorption correction.  $wR_2$  was 0.0606 before and 0.0512 after correction. The Ratio of



minimum to maximum transmission is 0.9066. The  $\lambda/2$  correction factor is 0.00150.

The structure was solved in the space group  $P-1$  (# 2) by Intrinsic Phasing using the **ShelXT**<sup>9</sup> structure solution program. The structure was refined by Least Squares using version 2014/6 of **XL**<sup>9</sup> incorporated in **Olex2**.<sup>6</sup> All non-hydrogen atoms were refined anisotropically. Hydrogen atom positions were calculated geometrically and refined using the riding model.

There is a single molecule in the asymmetric unit, which is represented by the reported sum formula. In other words:  $Z$  is 2 and  $Z'$  is 1.

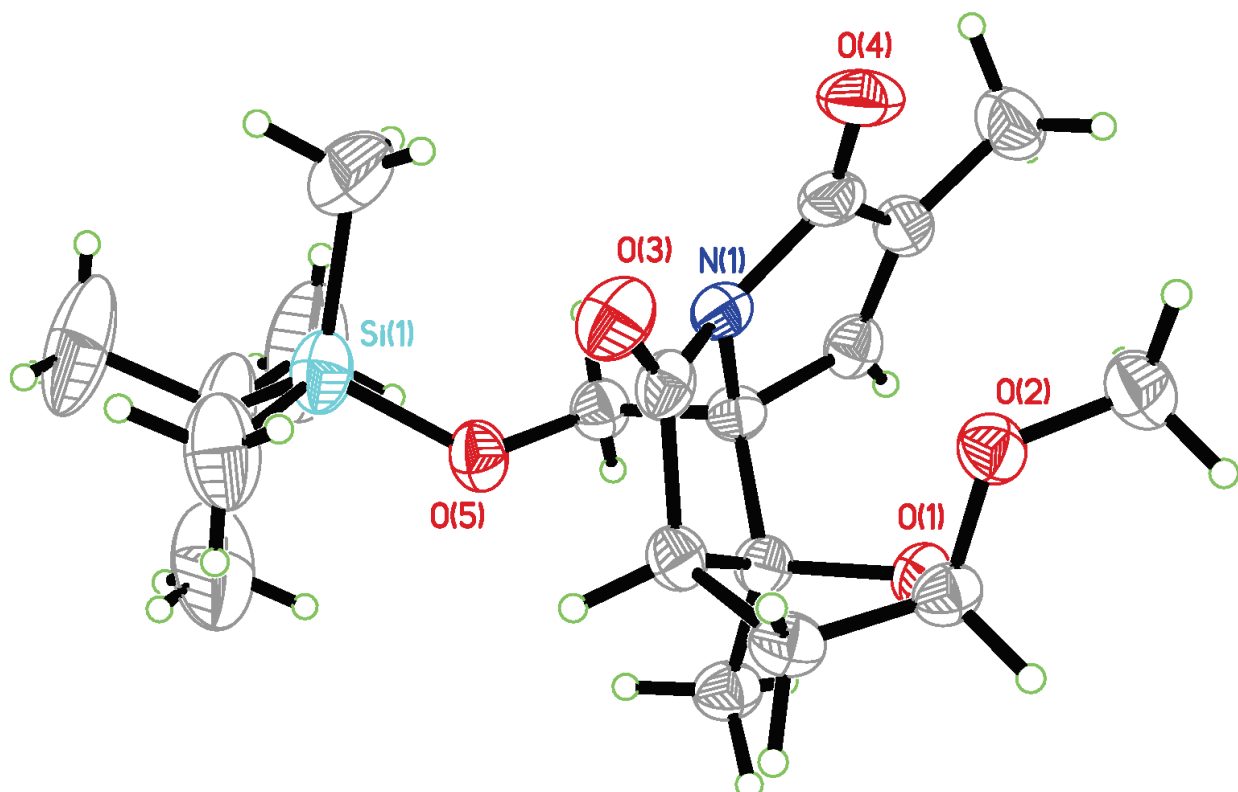

**Figure S7.** X-ray structure of **24** (view 1).

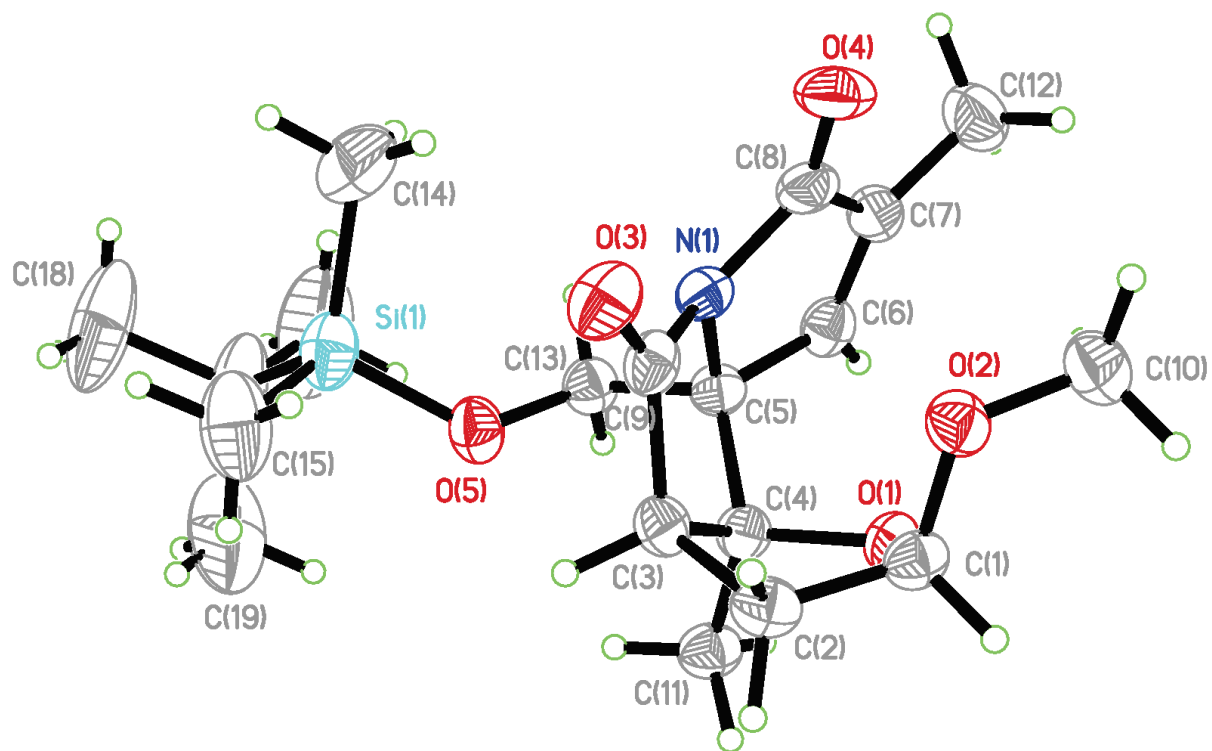

Figure S8. X-ray structure of 24 (view 2).

**Table S20:** Fractional Atomic Coordinates ( $\times 10^4$ ) and Equivalent Isotropic Displacement Parameters ( $\text{\AA}^2 \times 10^3$ ) for **24**.  $U_{eq}$  is defined as 1/3 of the trace of the orthogonalised  $U_{ij}$ .

| Atom | x          | y          | z          | $U_{eq}$ |
|------|------------|------------|------------|----------|
| Si1  | 5874.7(11) | 7679.7(12) | 3600.4(3)  | 45.6(2)  |
| O1   | 9017(2)    | 4166(2)    | 1153.2(7)  | 30.7(4)  |
| O2   | 12240(2)   | 4302(2)    | 1025.7(7)  | 34.8(4)  |
| O3   | 11576(2)   | 5871(2)    | 2472.6(8)  | 42.2(4)  |
| O4   | 10562(3)   | 9004(2)    | 1330.2(9)  | 46.7(5)  |
| O5   | 6037(2)    | 6652(2)    | 2936.2(7)  | 37.8(4)  |
| N1   | 8731(3)    | 7323(2)    | 1907.3(9)  | 29.0(4)  |
| C1   | 11146(3)   | 3114(3)    | 1188.5(11) | 31.6(5)  |
| C2   | 11416(3)   | 2408(3)    | 1882.7(11) | 33.6(5)  |
| C3   | 9658(3)    | 4025(3)    | 2229.3(11) | 30.1(5)  |
| C4   | 7955(3)    | 4652(3)    | 1783(1)    | 29.2(5)  |
| C5   | 6991(3)    | 6884(3)    | 1800.4(10) | 28.2(5)  |
| C6   | 6290(3)    | 8085(3)    | 1199.8(11) | 33.0(5)  |
| C7   | 7428(4)    | 9081(3)    | 990.3(11)  | 35.5(6)  |
| C8   | 9118(4)    | 8541(3)    | 1406.3(12) | 34.4(5)  |
| C9   | 10180(3)   | 5781(3)    | 2236.8(10) | 31.1(5)  |
| C10  | 12161(4)   | 5057(4)    | 378.5(12)  | 43.5(6)  |
| C11  | 6461(3)    | 3687(3)    | 1921.4(12) | 36.3(6)  |
| C12  | 7228(4)    | 10534(4)   | 440.4(13)  | 50.7(7)  |

|     |         |         |            |           |
|-----|---------|---------|------------|-----------|
| C13 | 5312(3) | 7603(3) | 2348.5(10) | 32.9(5)   |
| C14 | 6444(7) | 9874(6) | 3406.9(18) | 81.9(11)  |
| C15 | 7853(5) | 5821(5) | 4060.5(15) | 70(1)     |
| C16 | 3272(4) | 8301(6) | 4033.4(14) | 68.6(10)  |
| C17 | 1671(5) | 9814(8) | 3628.5(19) | 107.9(17) |
| C18 | 3191(6) | 9092(8) | 4680.3(17) | 106.1(17) |
| C19 | 2843(7) | 6460(8) | 4149.4(19) | 110.5(17) |

---

**Table S21:** Anisotropic Displacement Parameters ( $\times 10^4$ ) **24.** The anisotropic displacement factor exponent takes the form:  $-2\pi^2[h^2a^{*2} \times U_{11} + \dots + 2hka^* \times b^* \times U_{12}]$

| Atom | $U_{11}$ | $U_{22}$ | $U_{33}$ | $U_{23}$  | $U_{13}$ | $U_{12}$  |
|------|----------|----------|----------|-----------|----------|-----------|
| Si1  | 39.2(4)  | 62.8(5)  | 35.3(4)  | -9.3(3)   | 0.7(3)   | -20.2(4)  |
| O1   | 27.4(8)  | 32.2(8)  | 31.0(8)  | -6.5(6)   | -0.5(6)  | -9.8(6)   |
| O2   | 32.2(8)  | 39.4(9)  | 35.1(9)  | -2.6(7)   | -0.1(7)  | -17.2(7)  |
| O3   | 32.5(9)  | 51.5(11) | 45.7(10) | -11.6(8)  | -7.8(7)  | -16.4(8)  |
| O4   | 47.8(10) | 36.7(9)  | 63.5(12) | -7.6(8)   | 6.6(9)   | -27.3(8)  |
| O5   | 37.0(9)  | 39.6(9)  | 30.4(9)  | -2.1(7)   | 1.2(7)   | -9.5(7)   |
| N1   | 27.5(9)  | 28.1(9)  | 32.6(10) | -6.7(8)   | -0.1(8)  | -11.6(8)  |
| C1   | 26.5(11) | 27.4(11) | 38.6(13) | -6.4(9)   | -0.4(9)  | -7.9(9)   |
| C2   | 27.2(11) | 27.6(11) | 42.3(14) | 0.3(10)   | -3.5(10) | -7.5(9)   |
| C3   | 27.4(11) | 32.3(12) | 29.0(12) | -0.4(9)   | -0.6(9)  | -11.1(9)  |
| C4   | 28.1(11) | 28.4(11) | 29.9(12) | -3.2(9)   | 0.1(9)   | -10.2(9)  |
| C5   | 25.5(11) | 28.0(11) | 32.0(12) | -2.3(9)   | -3.3(9)  | -11.3(9)  |
| C6   | 31.7(12) | 31.5(12) | 31.6(12) | -4.6(10)  | -4.7(9)  | -6.9(10)  |
| C7   | 40.0(13) | 25.5(11) | 34.5(13) | -3.3(10)  | 3.9(10)  | -7.9(10)  |
| C8   | 36.4(13) | 23.9(11) | 41.6(14) | -10.5(10) | 6.3(10)  | -11.5(10) |
| C9   | 26.2(11) | 37.8(13) | 28.9(12) | -8.8(10)  | 2.0(9)   | -11.9(10) |
| C10  | 42.3(14) | 47.5(15) | 39.8(14) | 0.8(11)   | 2.9(11)  | -19.7(12) |
| C11  | 32.9(12) | 33.5(12) | 44.6(14) | -5.6(10)  | -0.1(10) | -15.4(10) |
| C12  | 59.6(17) | 40.1(14) | 45.2(16) | 5.2(12)   | 2.4(13)  | -16.2(13) |

|     |          |          |          |           |           |           |
|-----|----------|----------|----------|-----------|-----------|-----------|
| C13 | 30.8(12) | 31.9(12) | 32.5(12) | -3.1(10)  | -1.3(10)  | -8.8(10)  |
| C14 | 113(3)   | 93(3)    | 68(2)    | -23(2)    | -6(2)     | -67(2)    |
| C15 | 53.0(18) | 103(3)   | 46.4(18) | 1.4(17)   | -11.8(14) | -22.4(18) |
| C16 | 39.0(16) | 125(3)   | 40.6(17) | -28.9(18) | 6.0(13)   | -28.1(18) |
| C17 | 42.7(19) | 167(4)   | 76(3)    | -39(3)    | 2.4(17)   | 4(2)      |
| C18 | 65(2)    | 197(5)   | 58(2)    | -65(3)    | 19.5(18)  | -46(3)    |
| C19 | 95(3)    | 215(6)   | 66(2)    | -10(3)    | 15(2)     | -114(4)   |

---

**Table S22:** Bond Lengths in Å for **24**.

| Atom | Atom | Length/Å   |
|------|------|------------|
| Si1  | O5   | 1.6449(17) |
| Si1  | C14  | 1.859(4)   |
| Si1  | C15  | 1.846(3)   |
| Si1  | C16  | 1.872(3)   |
| O1   | C1   | 1.423(3)   |
| O1   | C4   | 1.450(3)   |
| O2   | C1   | 1.406(3)   |
| O2   | C10  | 1.422(3)   |
| O3   | C9   | 1.205(3)   |
| O4   | C8   | 1.210(3)   |
| O5   | C13  | 1.415(3)   |
| N1   | C5   | 1.466(3)   |
| N1   | C8   | 1.401(3)   |
| N1   | C9   | 1.404(3)   |
| C1   | C2   | 1.513(3)   |
| C2   | C3   | 1.533(3)   |
| C3   | C4   | 1.533(3)   |
| C3   | C9   | 1.523(3)   |
| C4   | C5   | 1.553(3)   |

|     |     |          |
|-----|-----|----------|
| C4  | C11 | 1.509(3) |
| C5  | C6  | 1.495(3) |
| C5  | C13 | 1.530(3) |
| C6  | C7  | 1.328(3) |
| C7  | C8  | 1.488(3) |
| C7  | C12 | 1.489(3) |
| C16 | C17 | 1.535(5) |
| C16 | C18 | 1.535(4) |
| C16 | C19 | 1.534(6) |



**Table S23:** Bond Angles in ° for **24**.

| Atom | Atom | Atom | Angle/°    |
|------|------|------|------------|
| O5   | Si1  | C14  | 109.58(13) |
| O5   | Si1  | C15  | 103.70(13) |
| O5   | Si1  | C16  | 110.02(12) |
| C14  | Si1  | C16  | 110.77(18) |
| C15  | Si1  | C14  | 110.93(18) |
| C15  | Si1  | C16  | 111.60(15) |
| C1   | O1   | C4   | 111.33(16) |
| C1   | O2   | C10  | 113.84(18) |
| C13  | O5   | Si1  | 126.46(14) |
| C8   | N1   | C5   | 111.01(18) |
| C8   | N1   | C9   | 126.95(18) |
| C9   | N1   | C5   | 111.81(17) |
| O1   | C1   | C2   | 106.30(17) |
| O2   | C1   | O1   | 111.67(17) |
| O2   | C1   | C2   | 107.13(18) |
| C1   | C2   | C3   | 101.61(17) |
| C4   | C3   | C2   | 103.59(17) |
| C9   | C3   | C2   | 110.52(18) |
| C9   | C3   | C4   | 105.08(17) |

|     |     |     |            |
|-----|-----|-----|------------|
| O1  | C4  | C3  | 104.42(16) |
| O1  | C4  | C5  | 108.23(17) |
| O1  | C4  | C11 | 108.55(18) |
| C3  | C4  | C5  | 103.74(17) |
| C11 | C4  | C3  | 116.22(19) |
| C11 | C4  | C5  | 114.95(18) |
| N1  | C5  | C4  | 102.37(16) |
| N1  | C5  | C6  | 102.37(17) |
| N1  | C5  | C13 | 109.52(17) |
| C6  | C5  | C4  | 119.14(18) |
| C6  | C5  | C13 | 109.09(17) |
| C13 | C5  | C4  | 113.21(18) |
| C7  | C6  | C5  | 111.5(2)   |
| C6  | C7  | C8  | 109.1(2)   |
| C6  | C7  | C12 | 130.3(2)   |
| C8  | C7  | C12 | 120.6(2)   |
| O4  | C8  | N1  | 126.2(2)   |
| O4  | C8  | C7  | 128.1(2)   |
| N1  | C8  | C7  | 105.71(19) |
| O3  | C9  | N1  | 125.0(2)   |
| O3  | C9  | C3  | 127.6(2)   |
| O5  | C13 | C5  | 110.00(17) |

|     |     |     |          |
|-----|-----|-----|----------|
| C17 | C16 | Si1 | 109.9(2) |
| C18 | C16 | Si1 | 109.7(2) |
| C18 | C16 | C17 | 109.8(3) |
| C19 | C16 | Si1 | 108.5(3) |
| C19 | C16 | C17 | 109.7(3) |
| C19 | C16 | C18 | 109.2(3) |

---

**Table S24:** Hydrogen Fractional Atomic Coordinates ( $\times 10^4$ ) and Equivalent Isotropic Displacement Parameters ( $\text{\AA}^2 \times 10^3$ ) for **24**.  $U_{eq}$  is defined as 1/3 of the trace of the orthogonalised  $U_{ij}$ .

| Atom | x     | y     | z    | $U_{eq}$ |
|------|-------|-------|------|----------|
| H1   | 11670 | 2000  | 908  | 38       |
| H2A  | 12753 | 2283  | 2001 | 40       |
| H2B  | 11280 | 1154  | 1976 | 40       |
| H3   | 9240  | 3581  | 2668 | 36       |
| H6   | 5171  | 8129  | 994  | 40       |
| H10A | 12523 | 4004  | 94   | 65       |
| H10B | 13126 | 5688  | 279  | 65       |
| H10C | 10779 | 5999  | 316  | 65       |
| H11A | 5450  | 4184  | 1608 | 54       |
| H11B | 5772  | 3958  | 2353 | 54       |
| H11C | 7193  | 2290  | 1893 | 54       |
| H12A | 8335  | 9987  | 105  | 76       |
| H12B | 7303  | 11687 | 585  | 76       |
| H12C | 5914  | 10883 | 270  | 76       |
| H13A | 4877  | 9013  | 2370 | 39       |
| H13B | 4116  | 7350  | 2269 | 39       |
| H14A | 7693  | 9564  | 3115 | 123      |
| H14B | 6629  | 10330 | 3802 | 123      |
| H14C | 5308  | 10885 | 3202 | 123      |

|      |      |       |      |     |
|------|------|-------|------|-----|
| H15A | 7581 | 4644  | 4127 | 105 |
| H15B | 7834 | 6296  | 4476 | 105 |
| H15C | 9193 | 5539  | 3822 | 105 |
| H17A | 1649 | 9264  | 3232 | 162 |
| H17B | 2017 | 10946 | 3525 | 162 |
| H17C | 326  | 10200 | 3870 | 162 |
| H18A | 4295 | 8171  | 4921 | 159 |
| H18B | 1877 | 9285  | 4925 | 159 |
| H18C | 3348 | 10326 | 4608 | 159 |
| H19B | 1495 | 6756  | 4384 | 166 |
| H19C | 3883 | 5489  | 4401 | 166 |

---

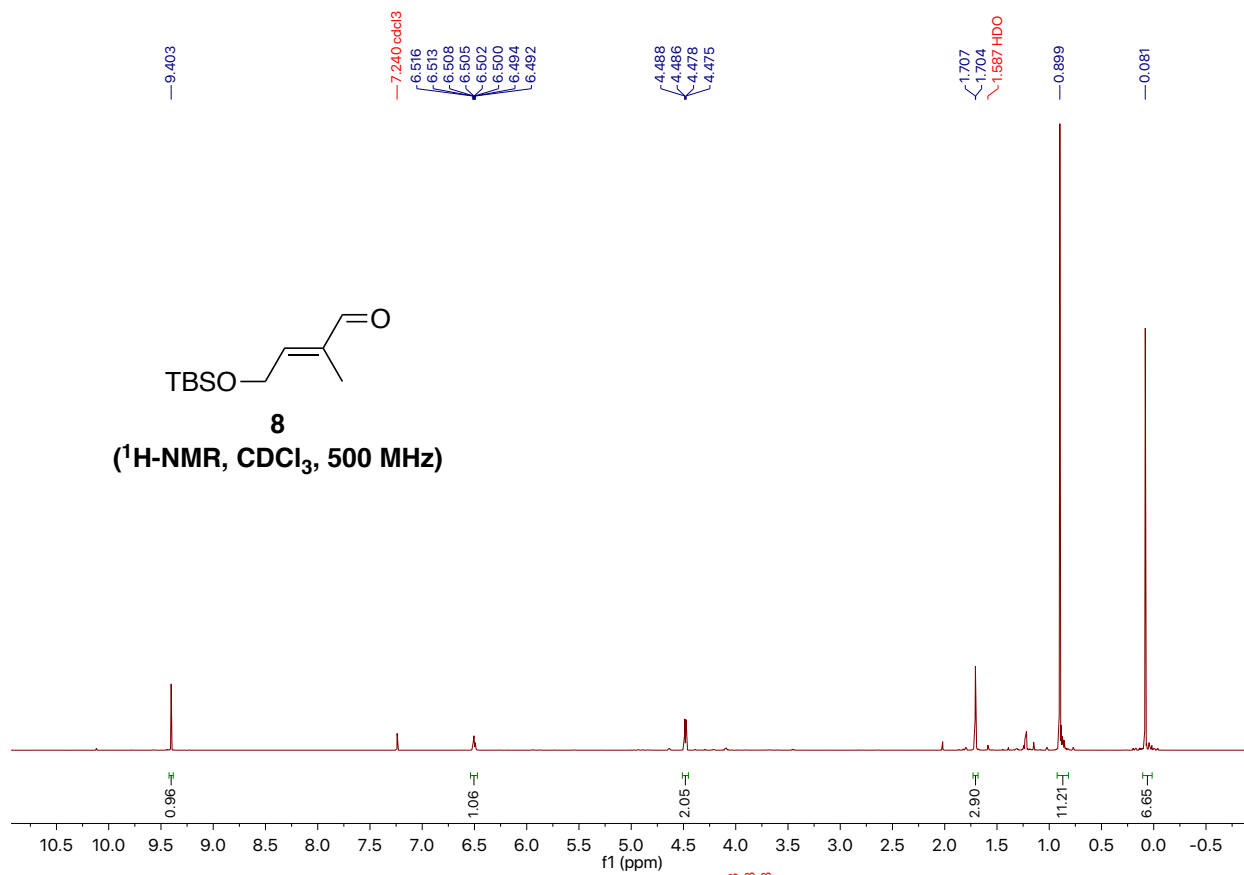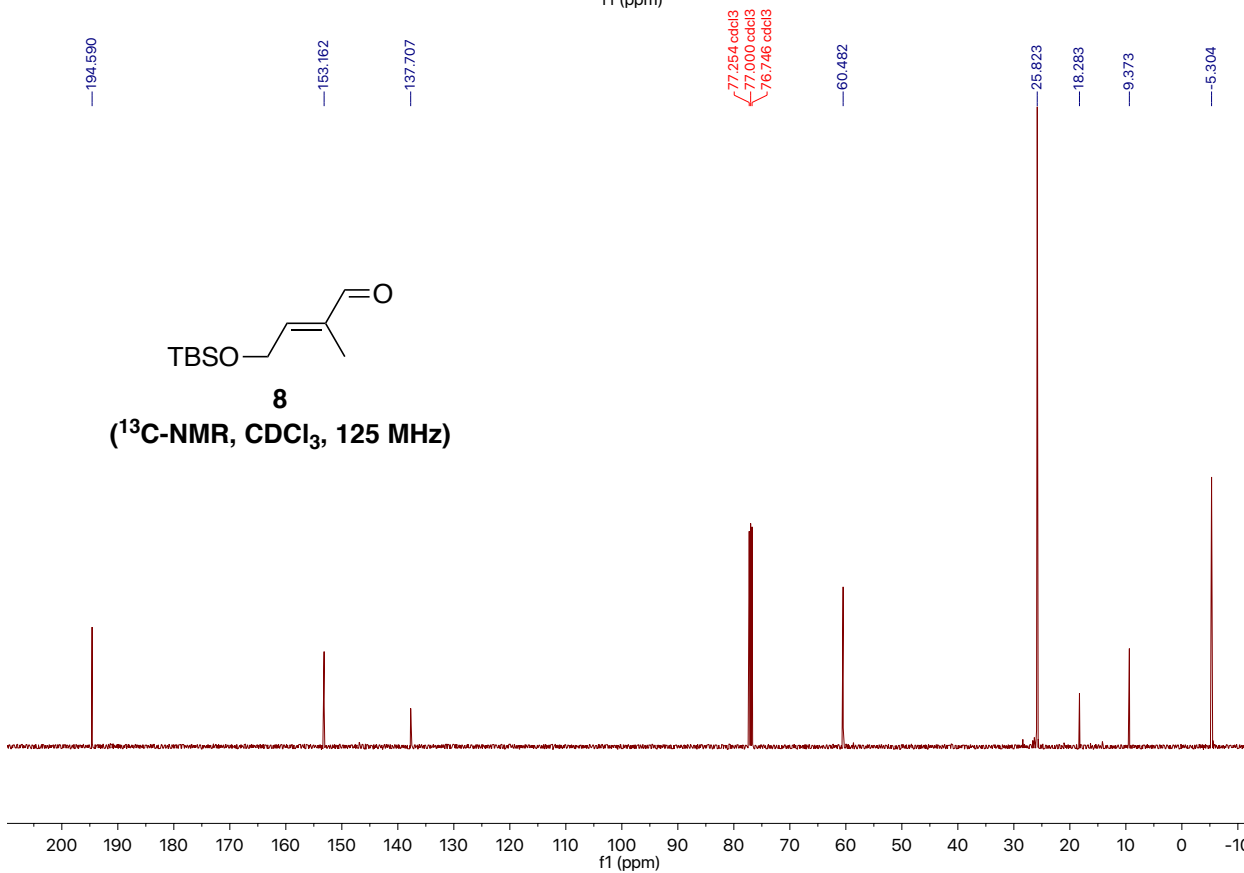

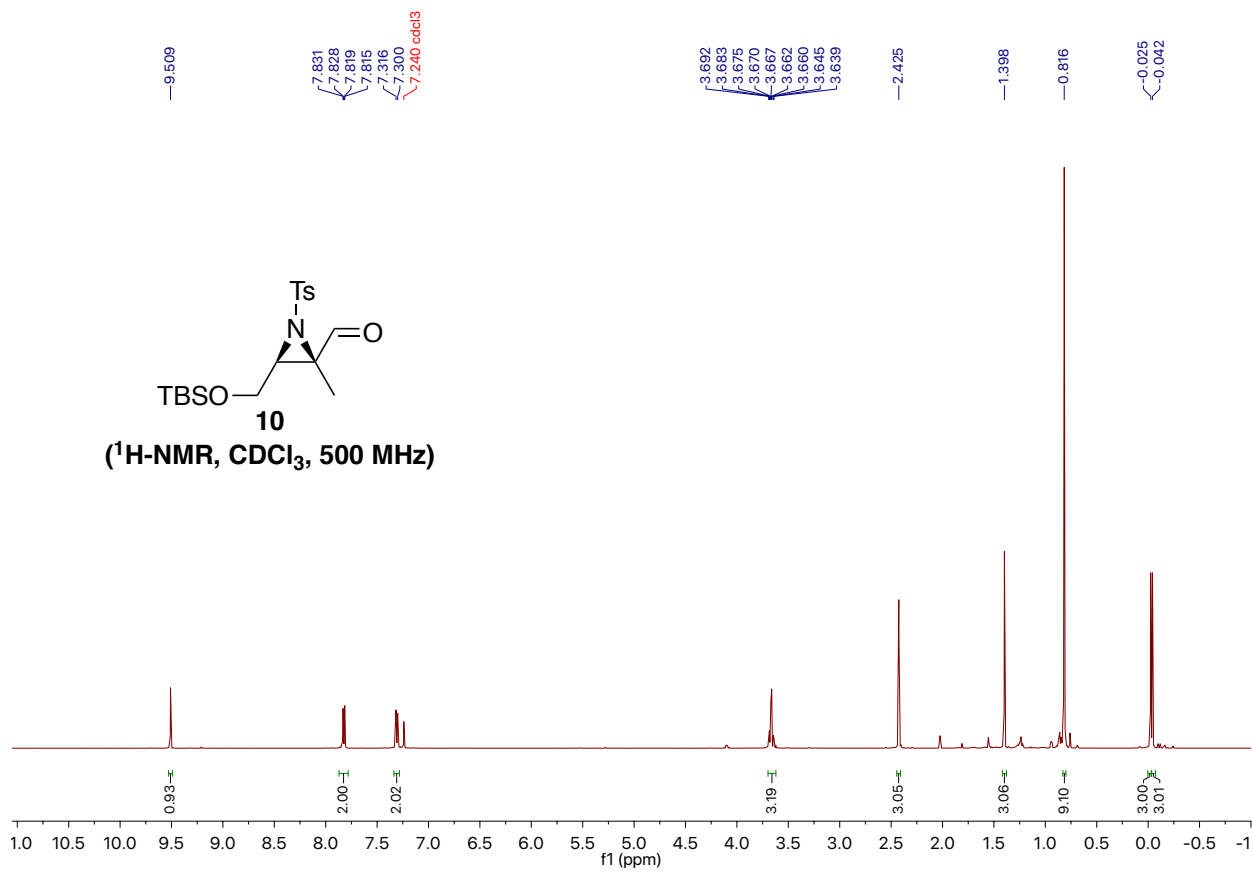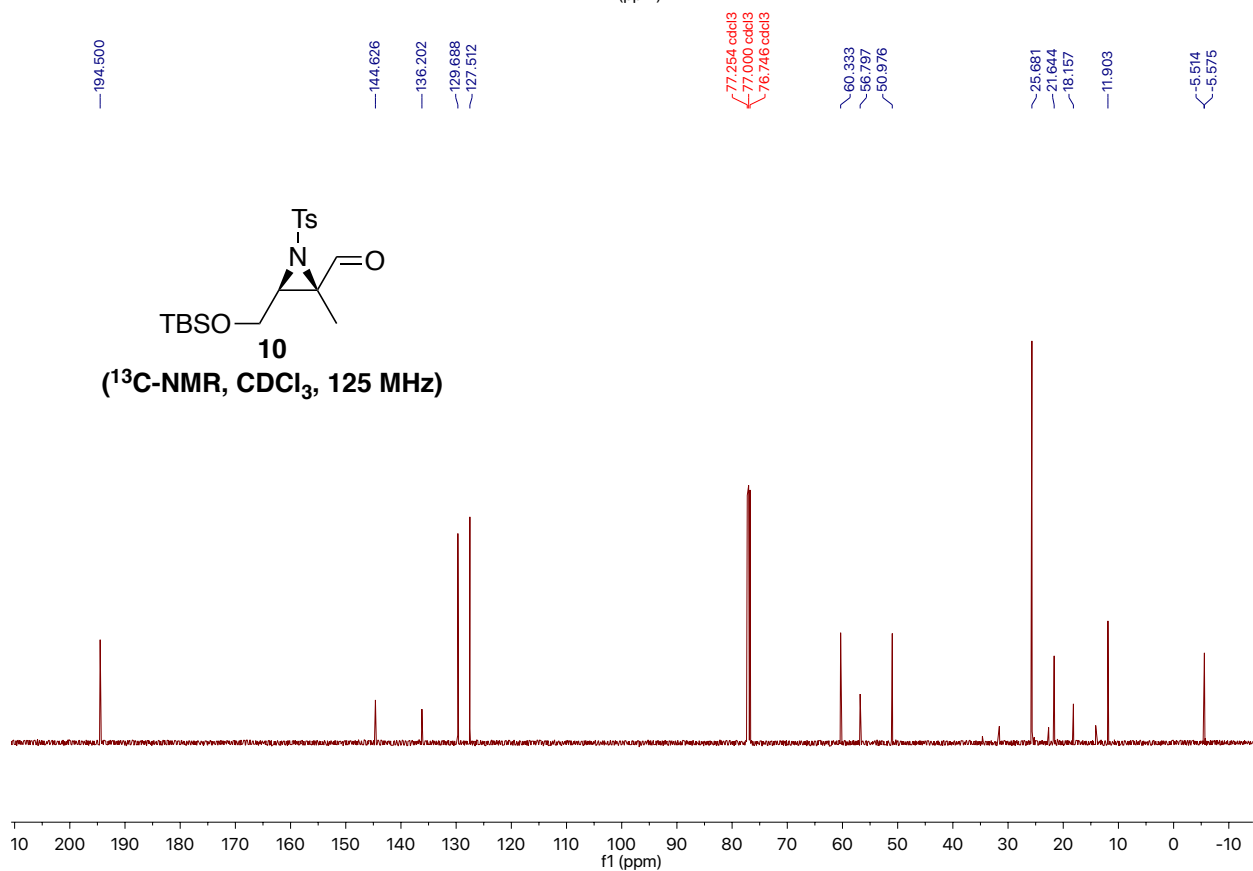

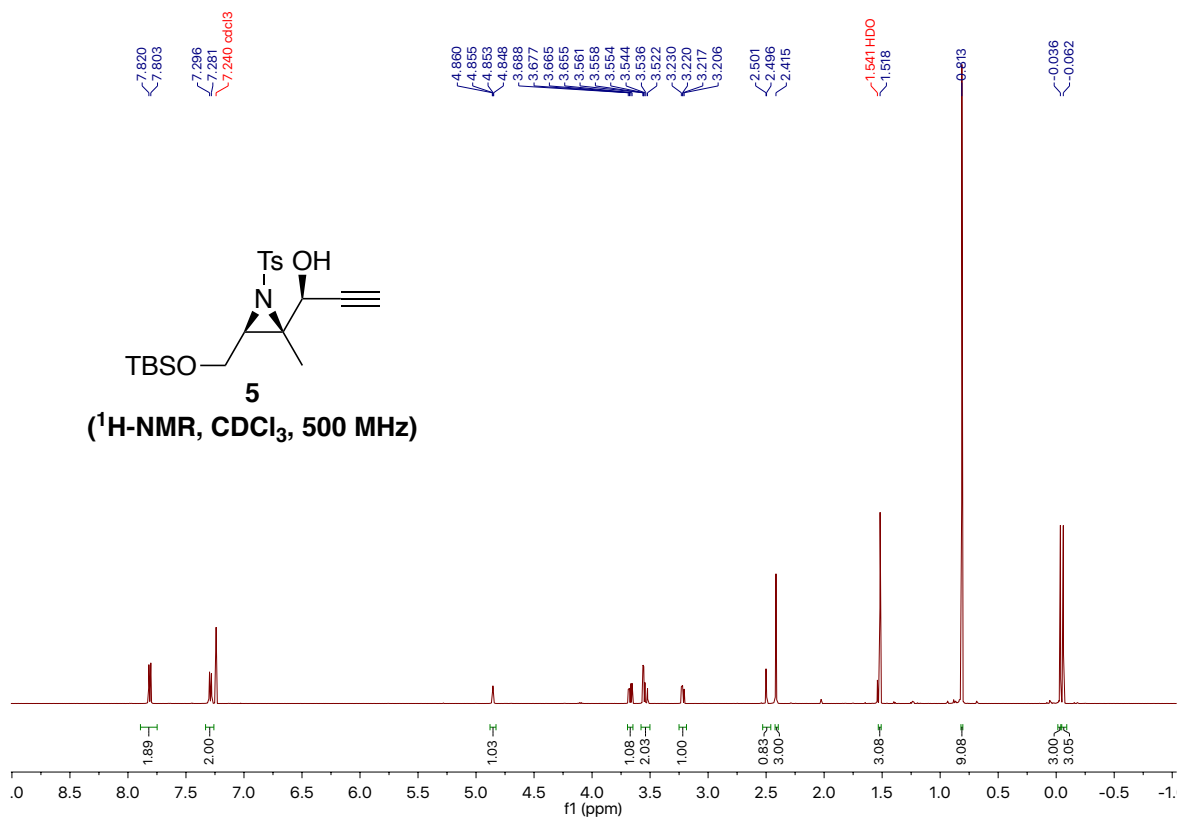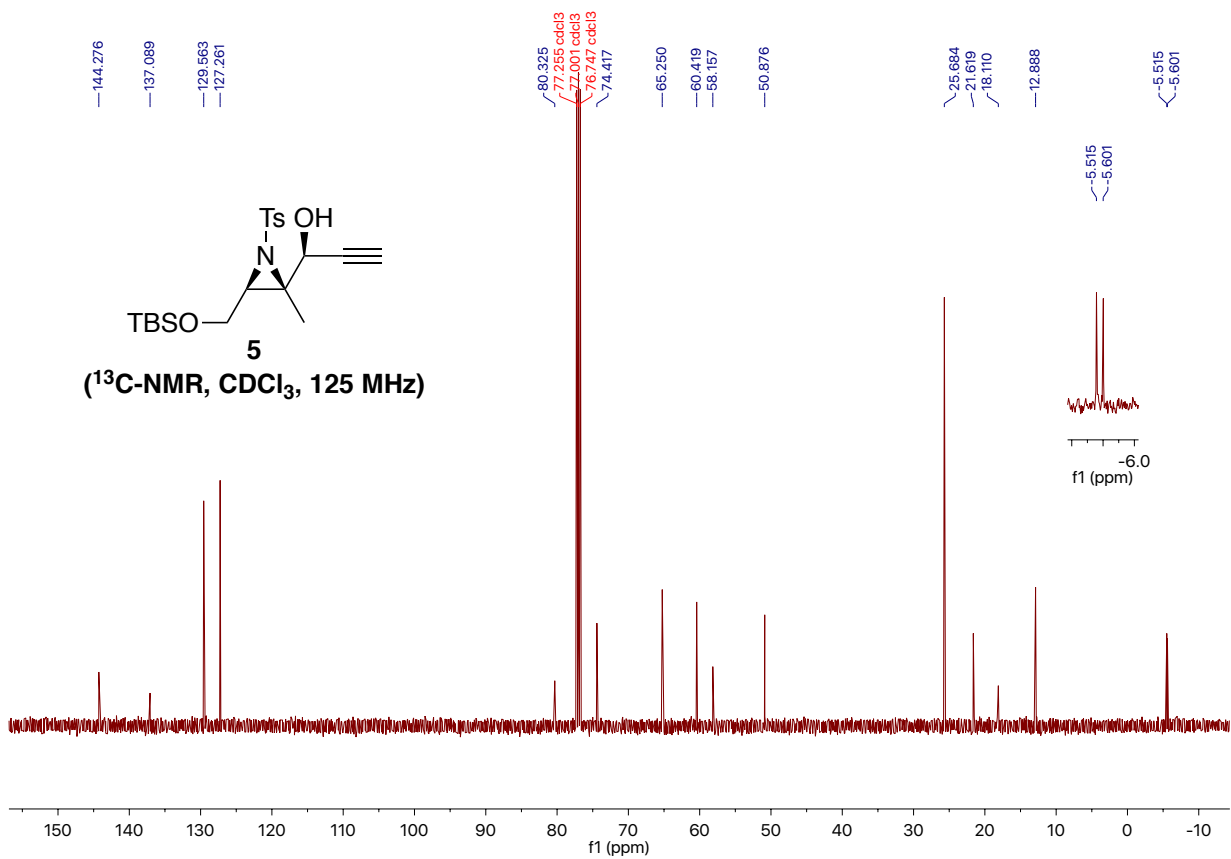



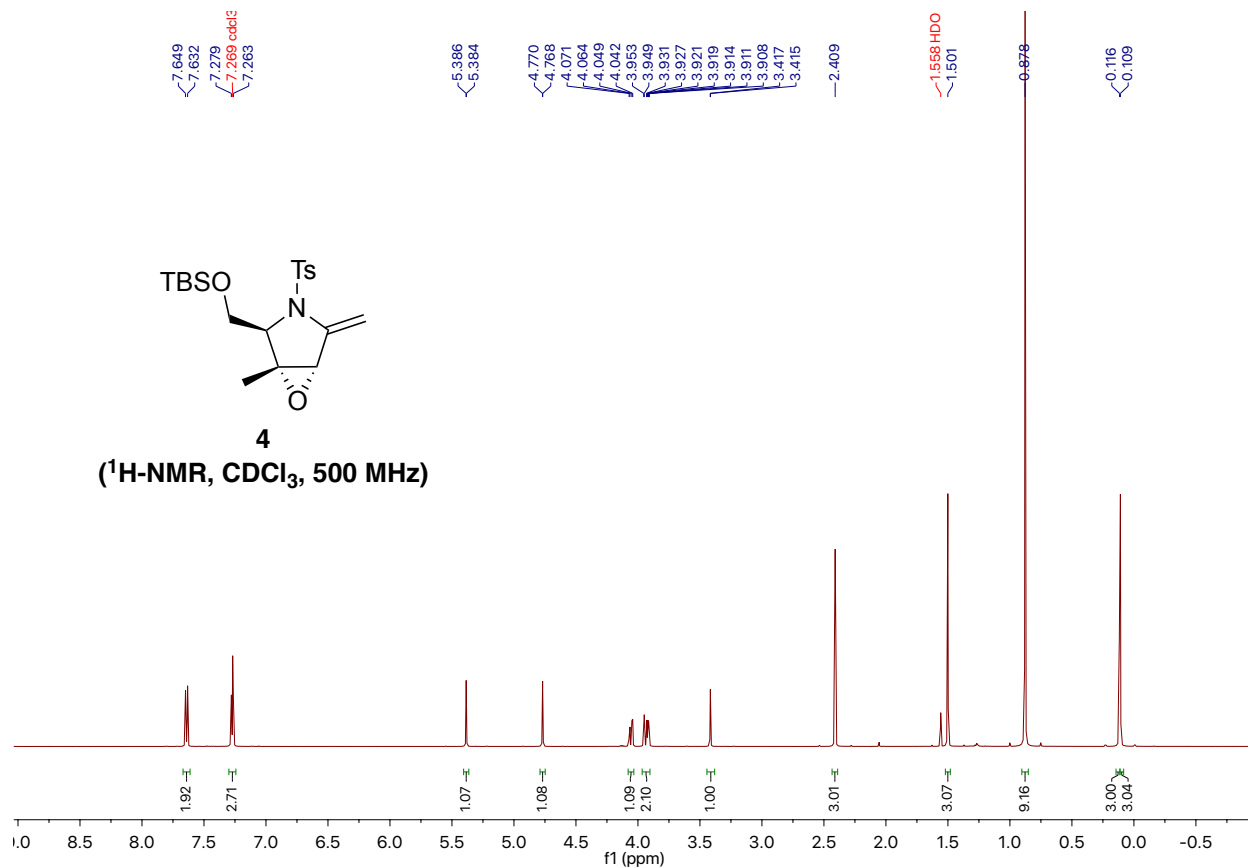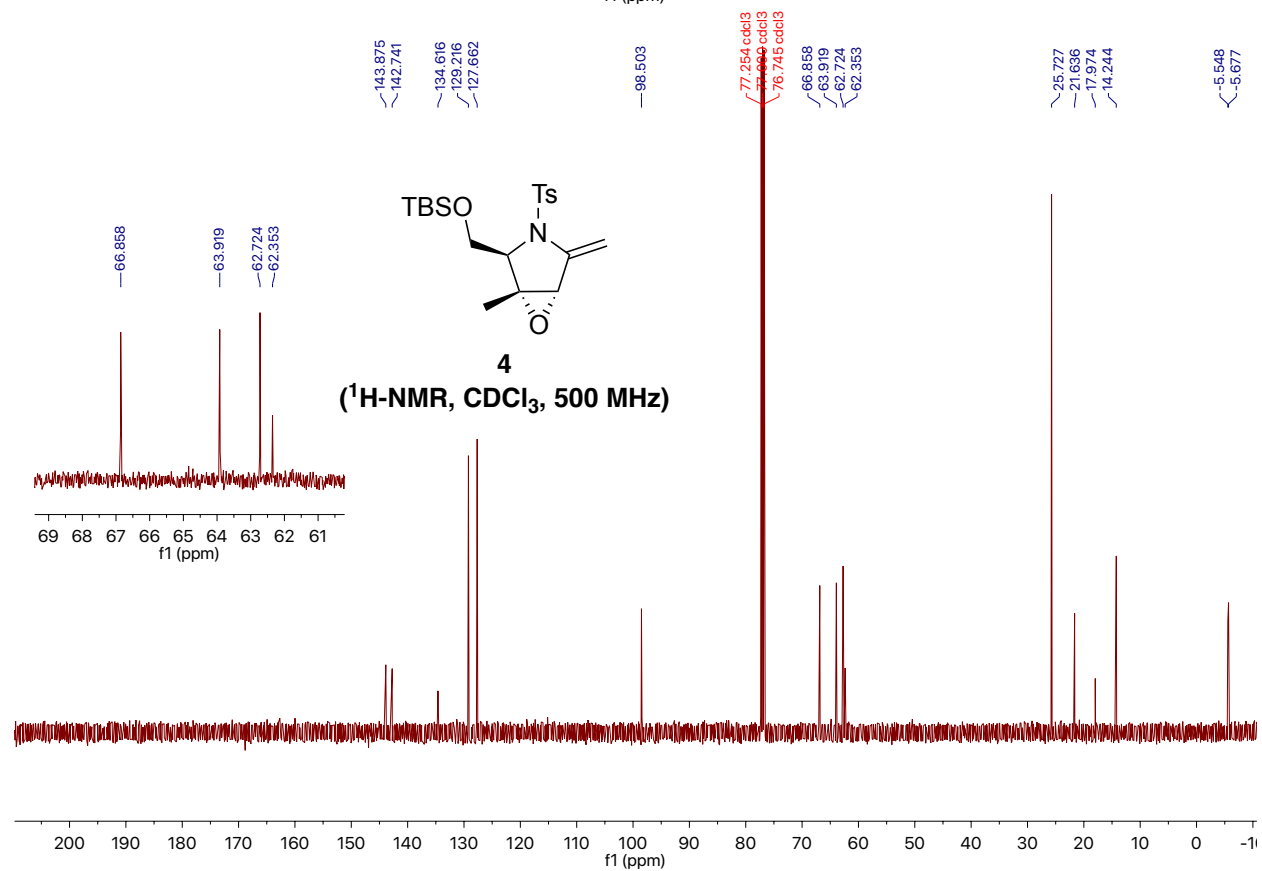

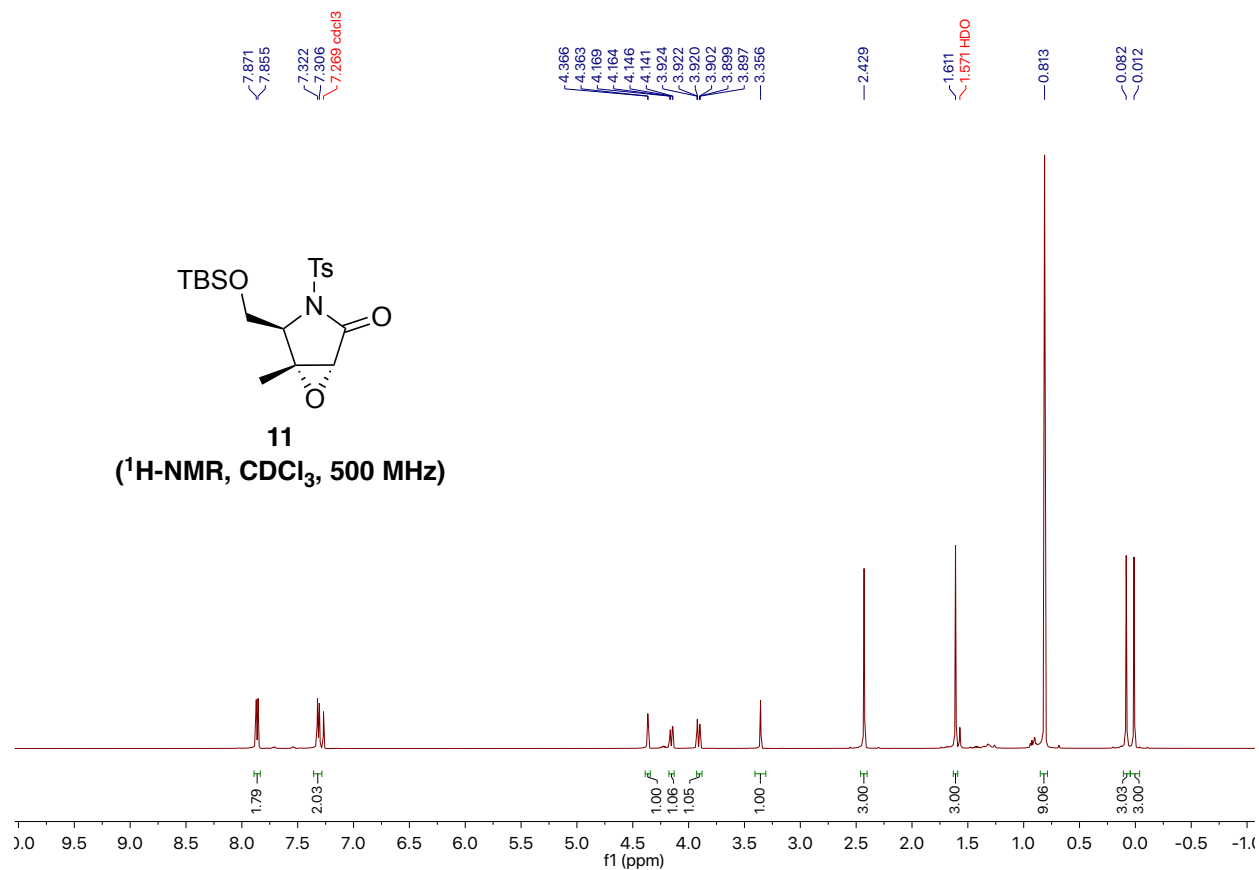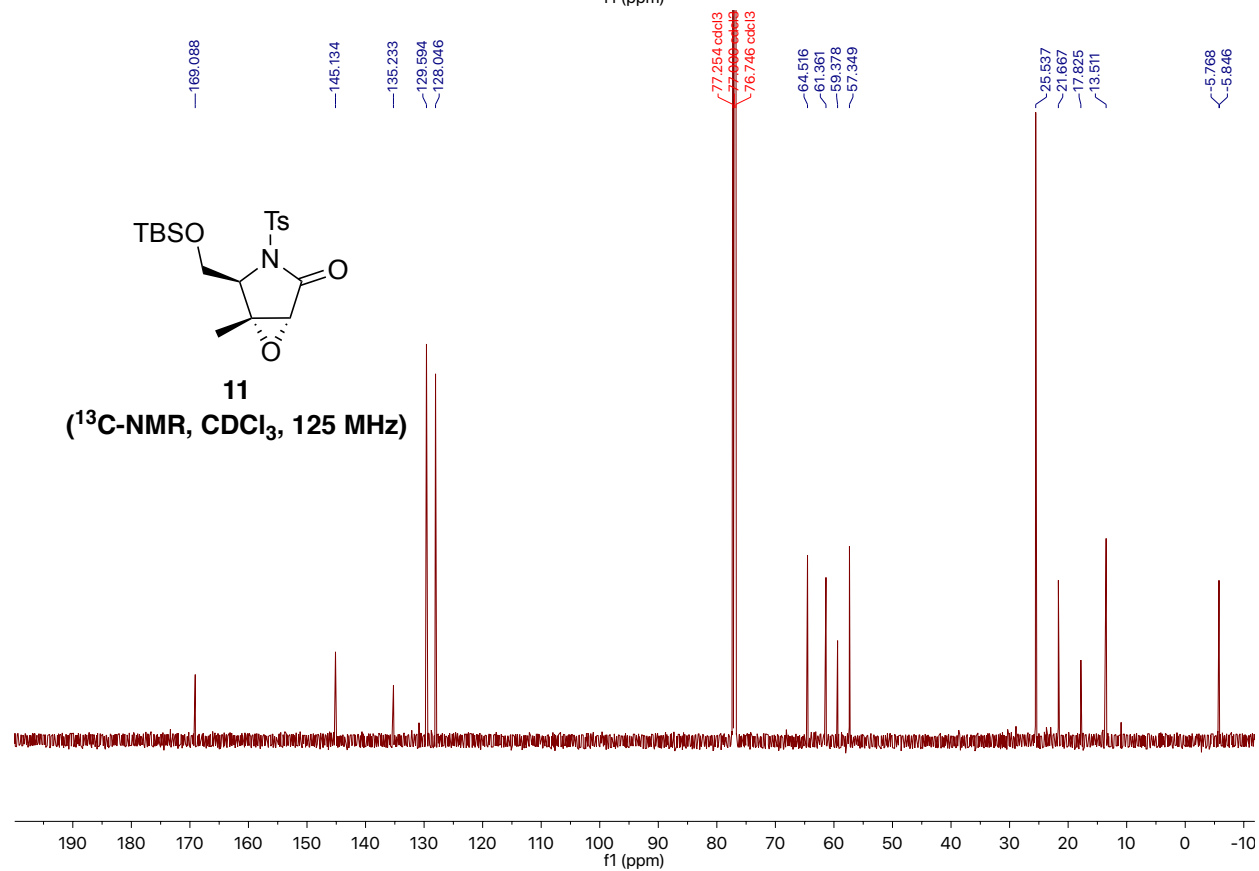

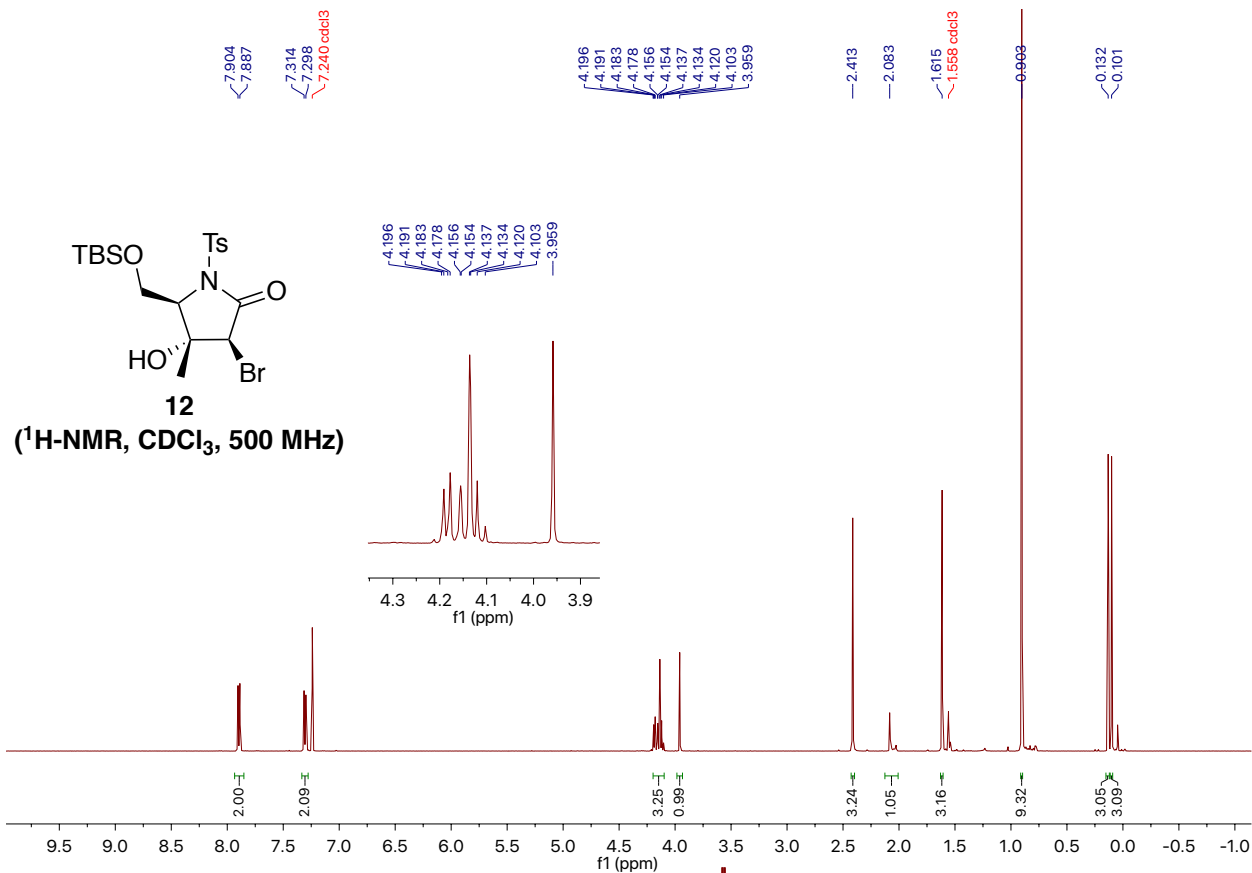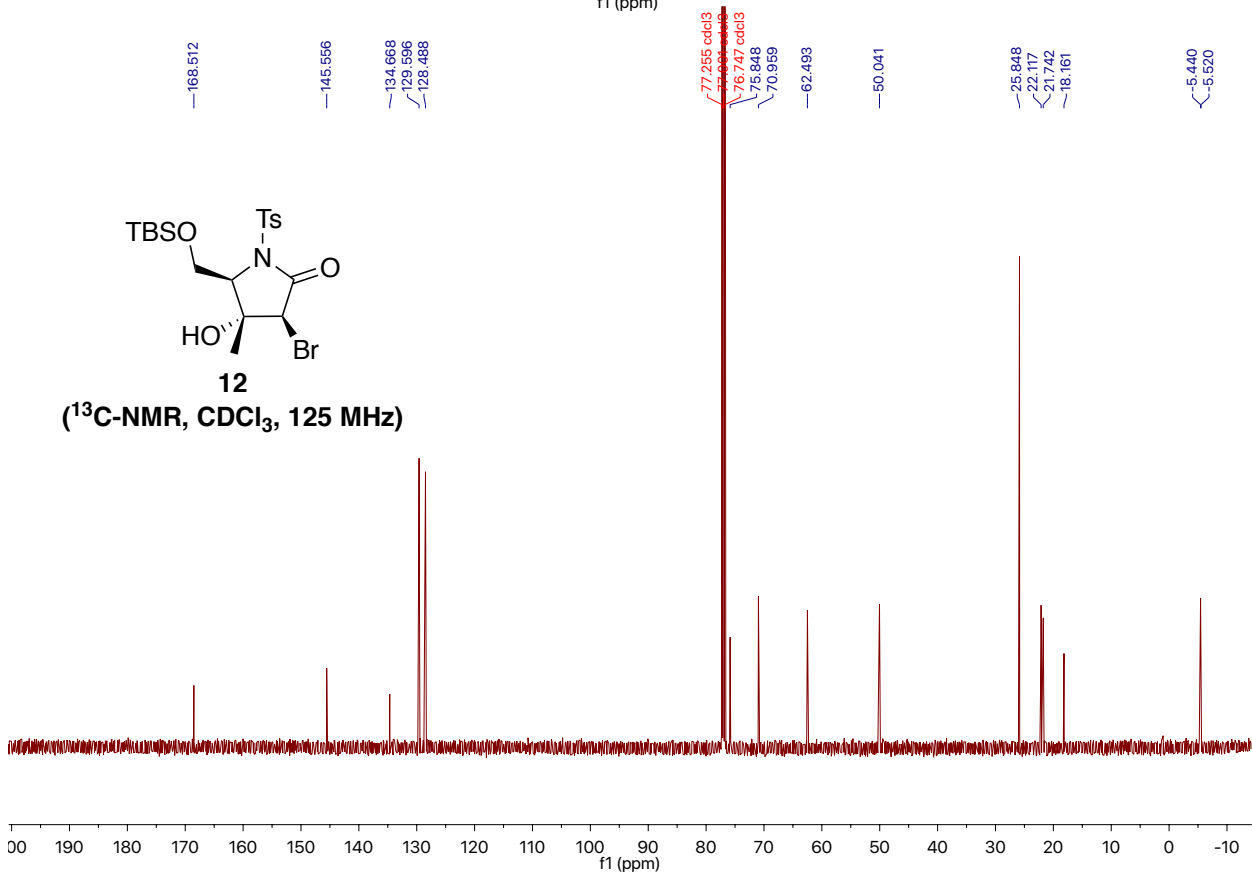

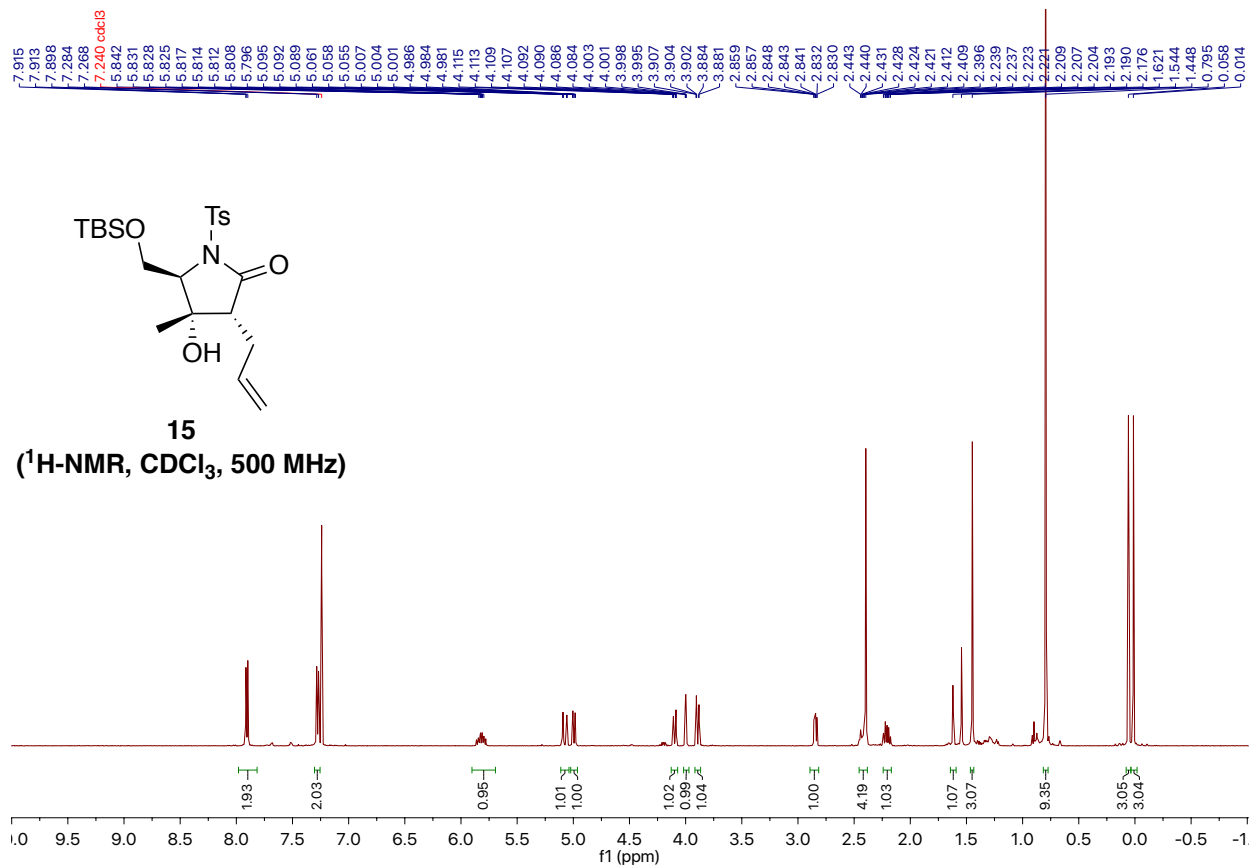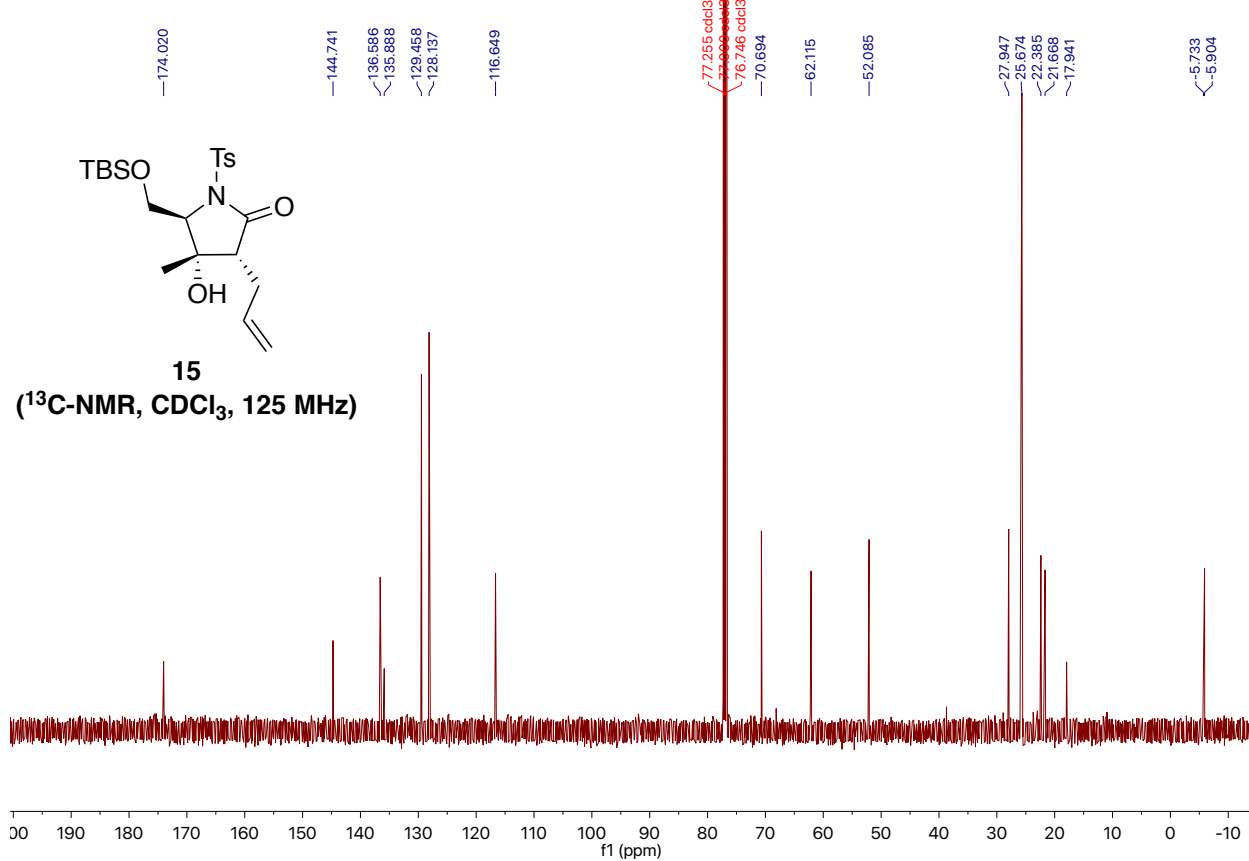



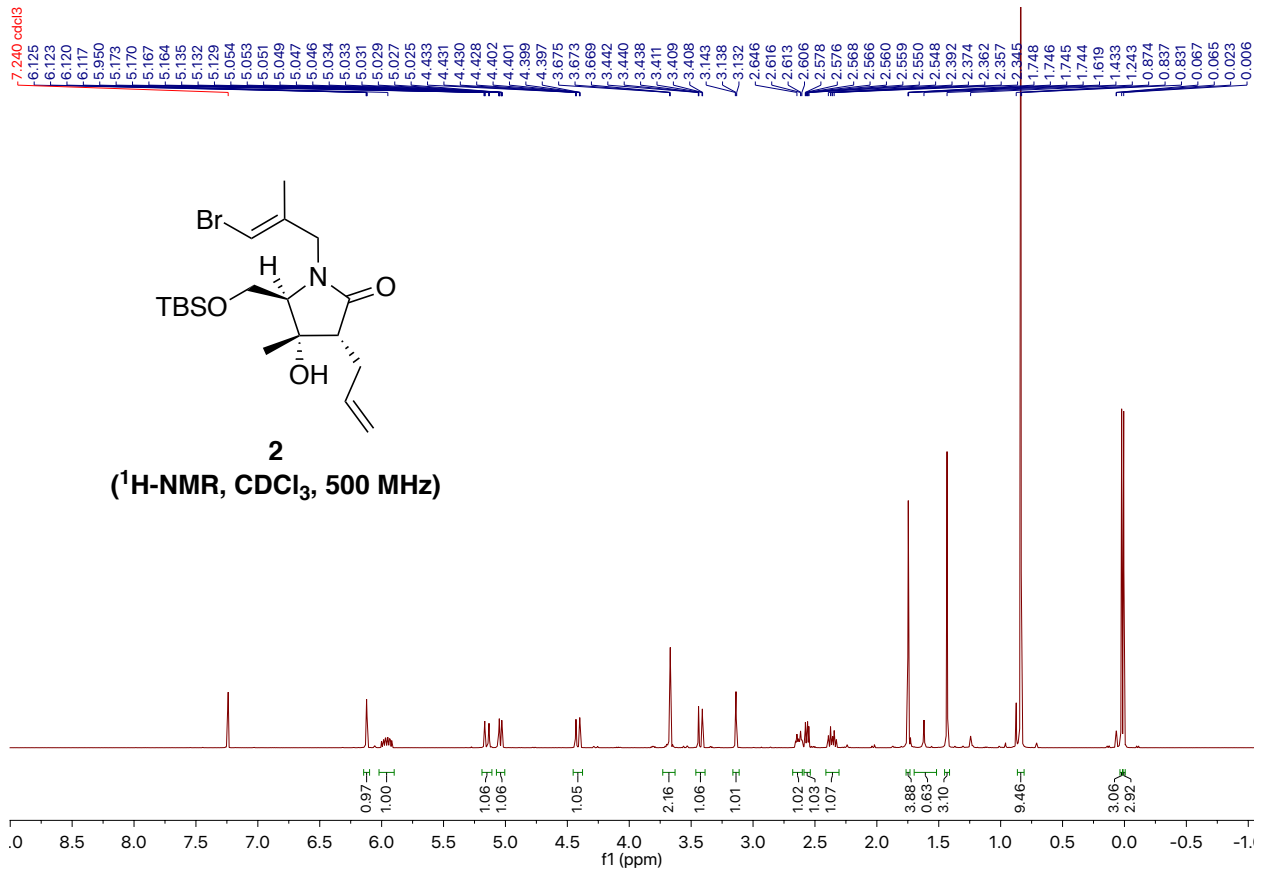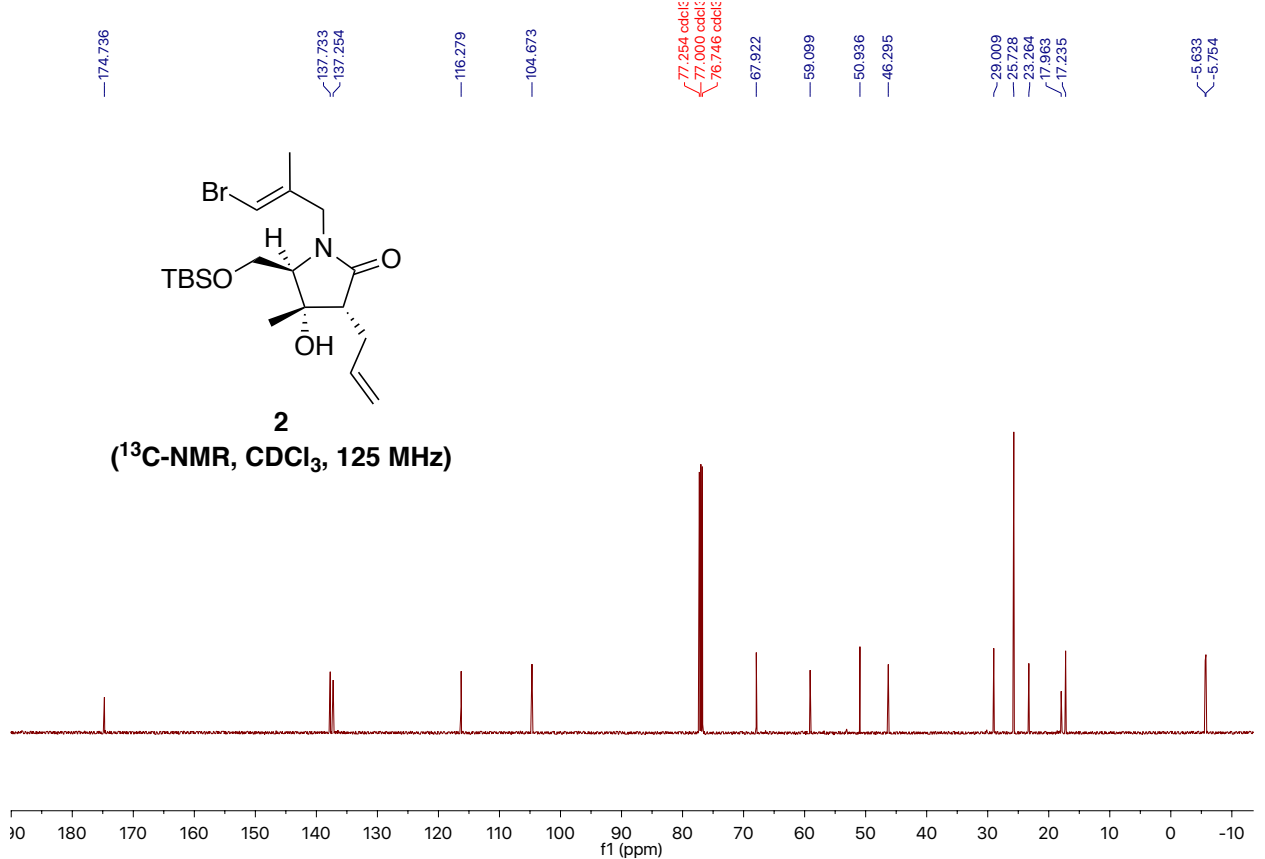

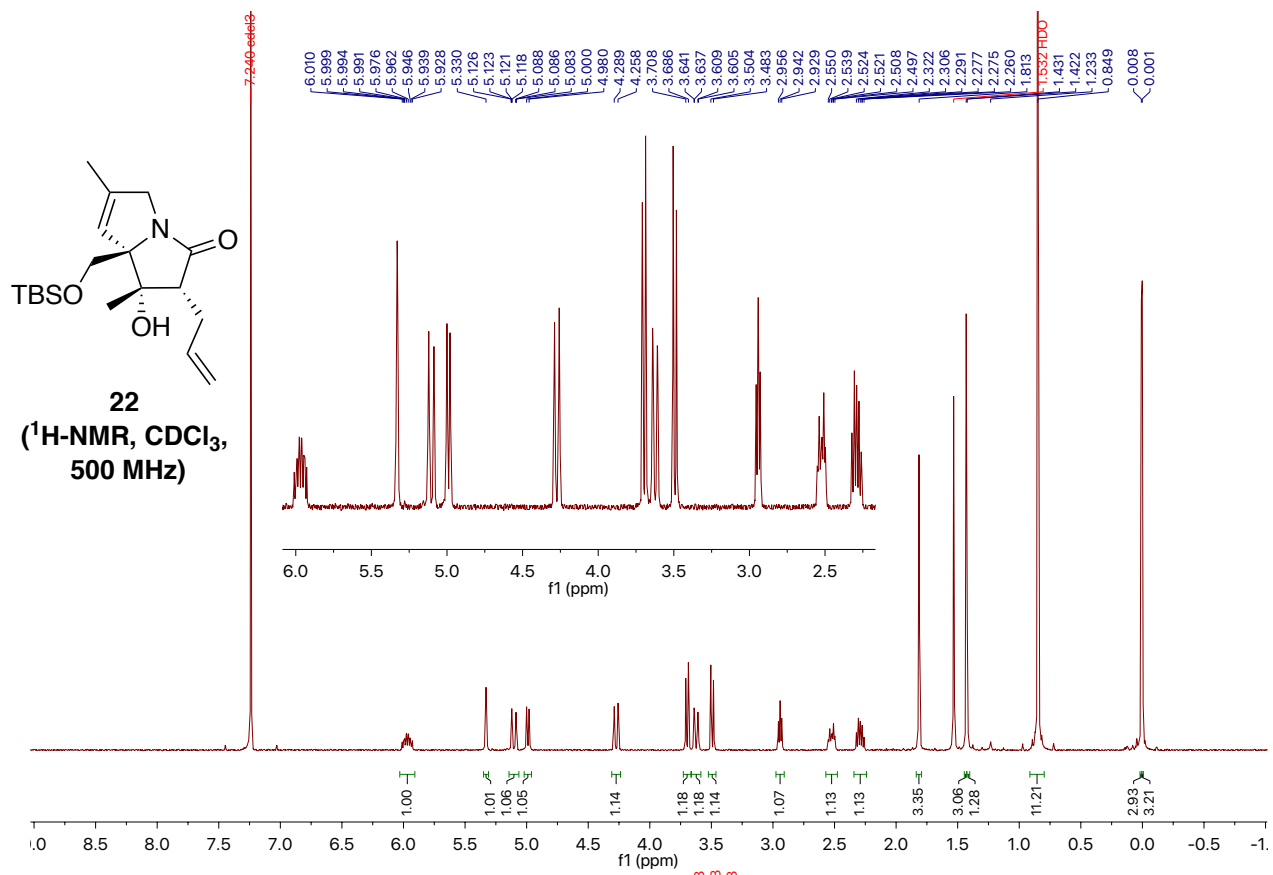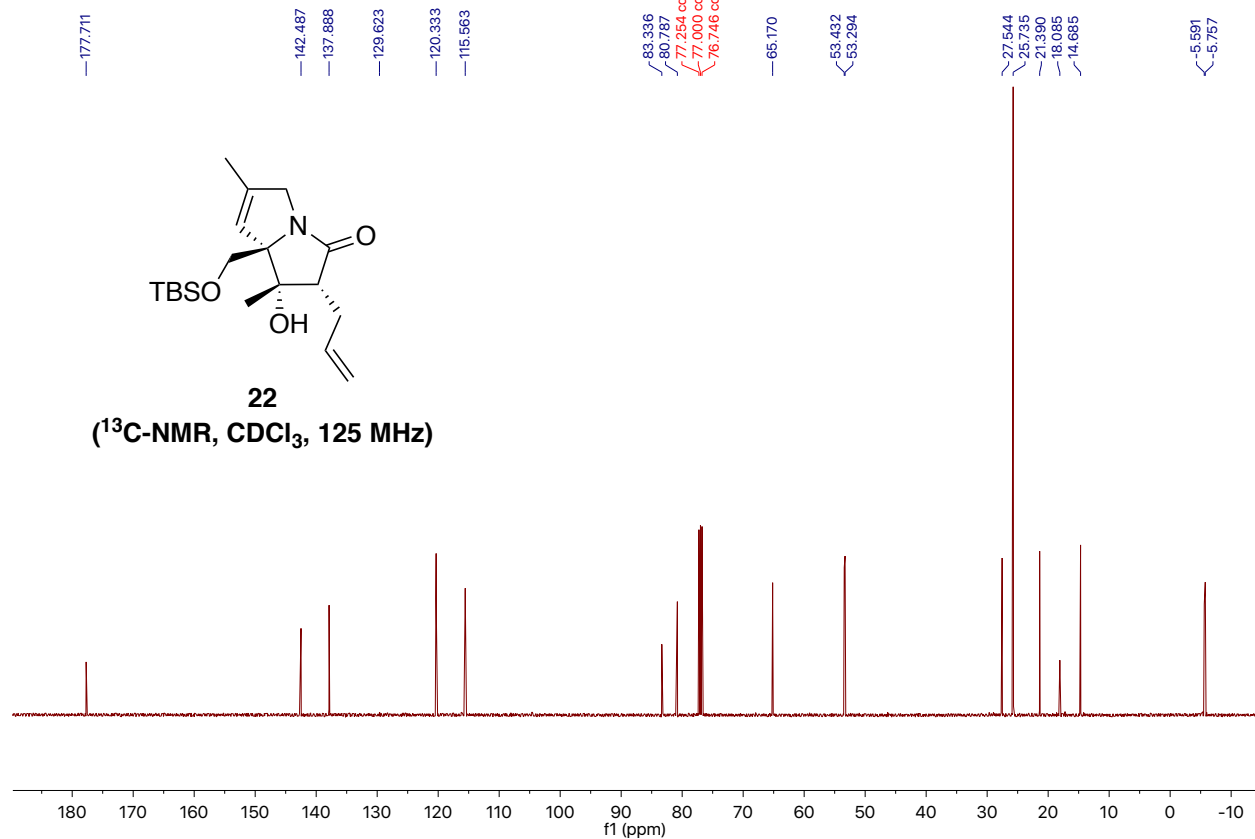

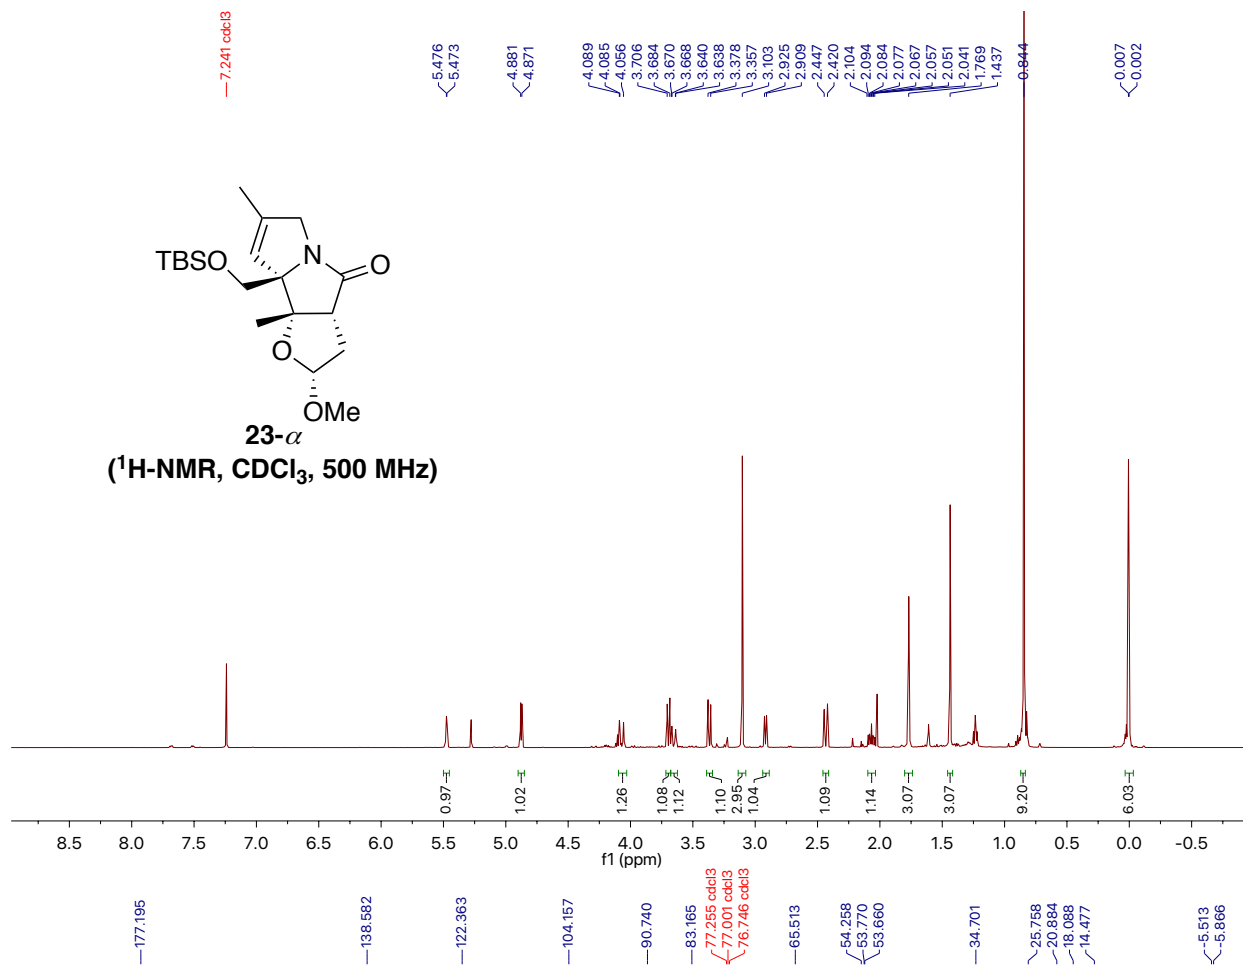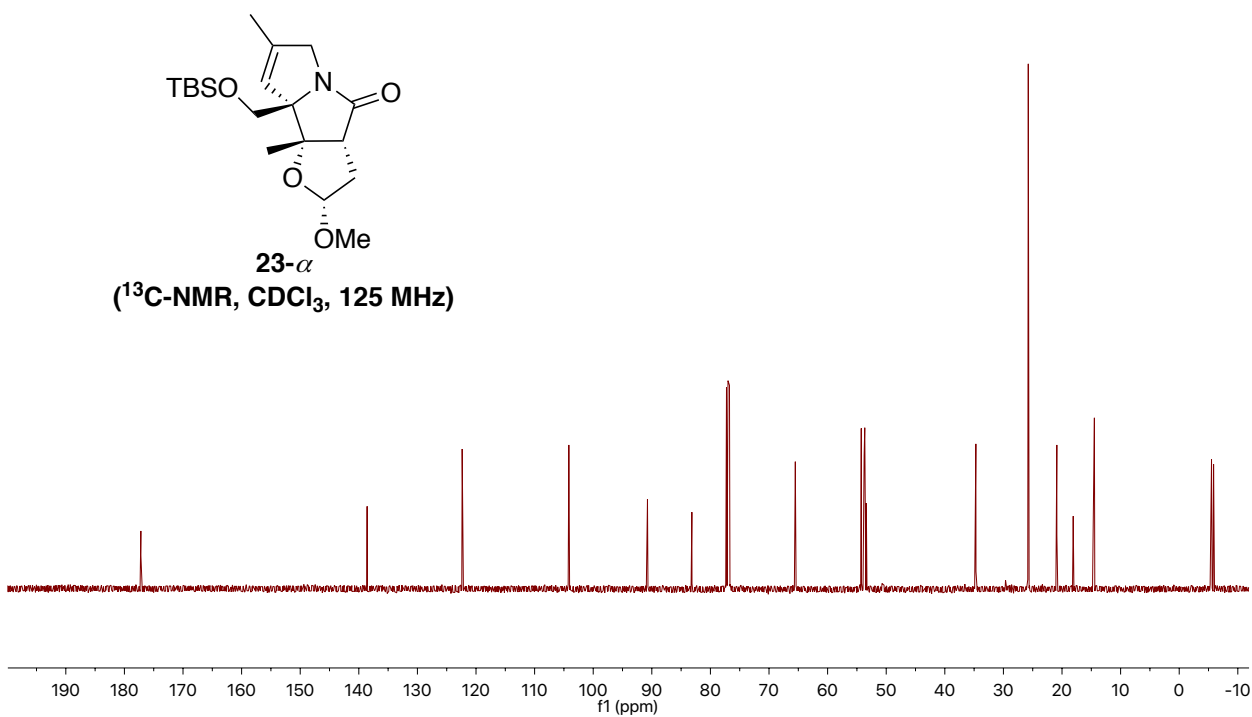



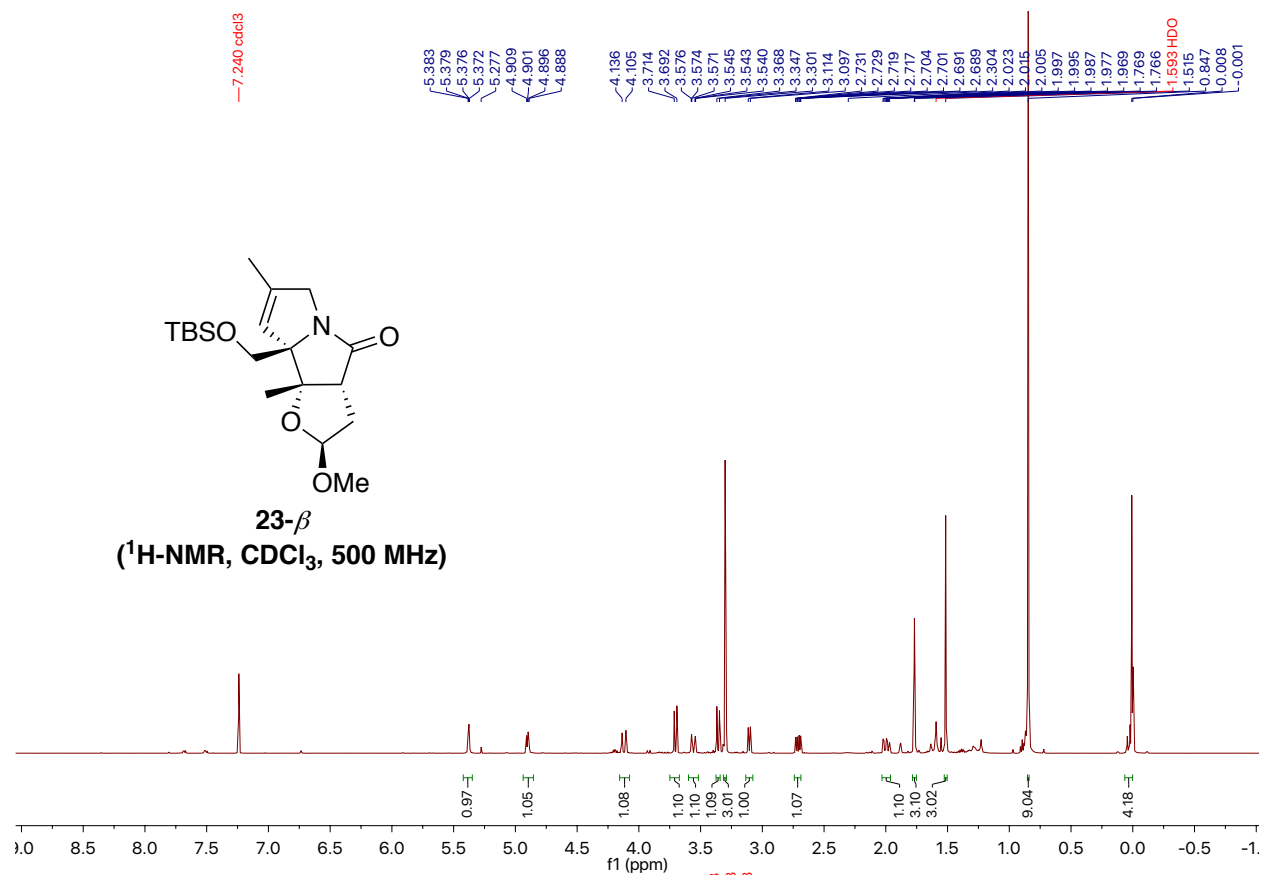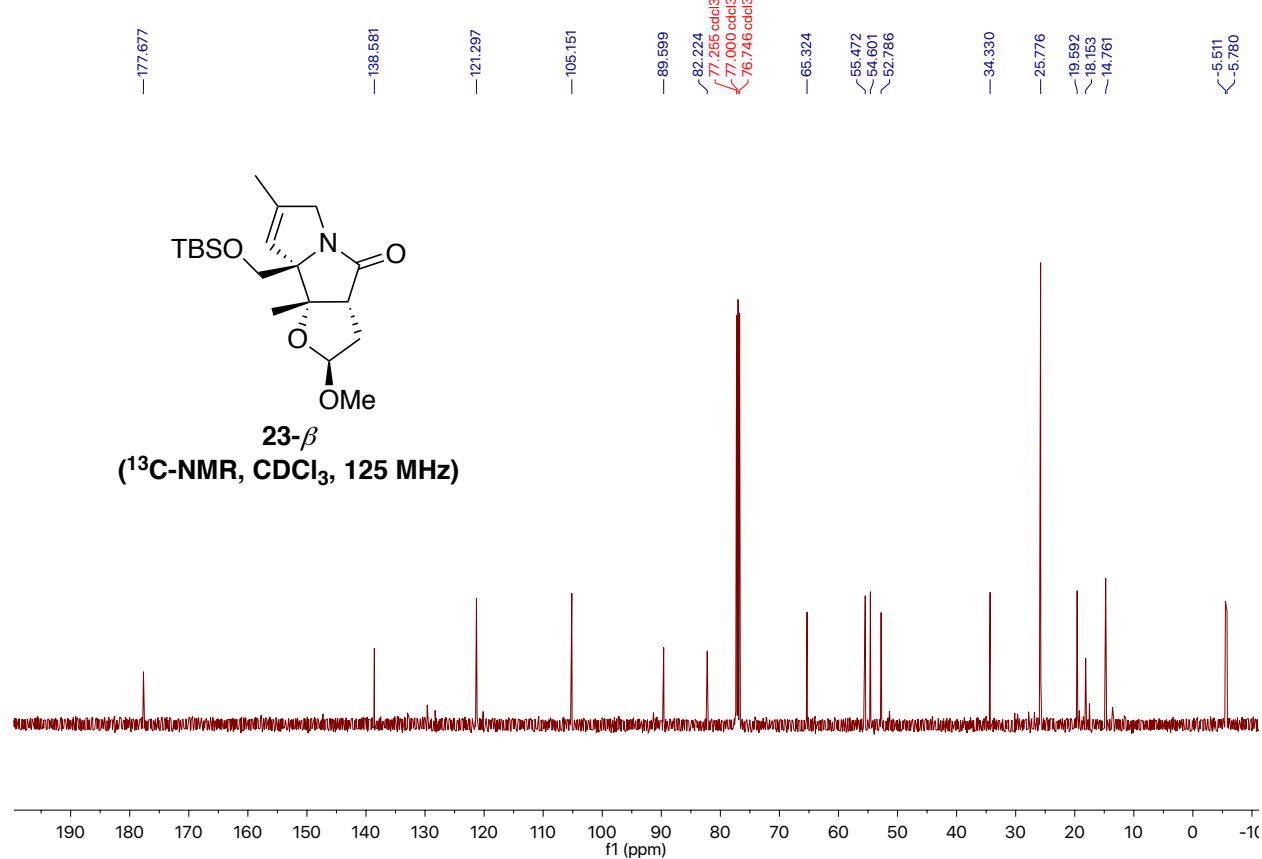

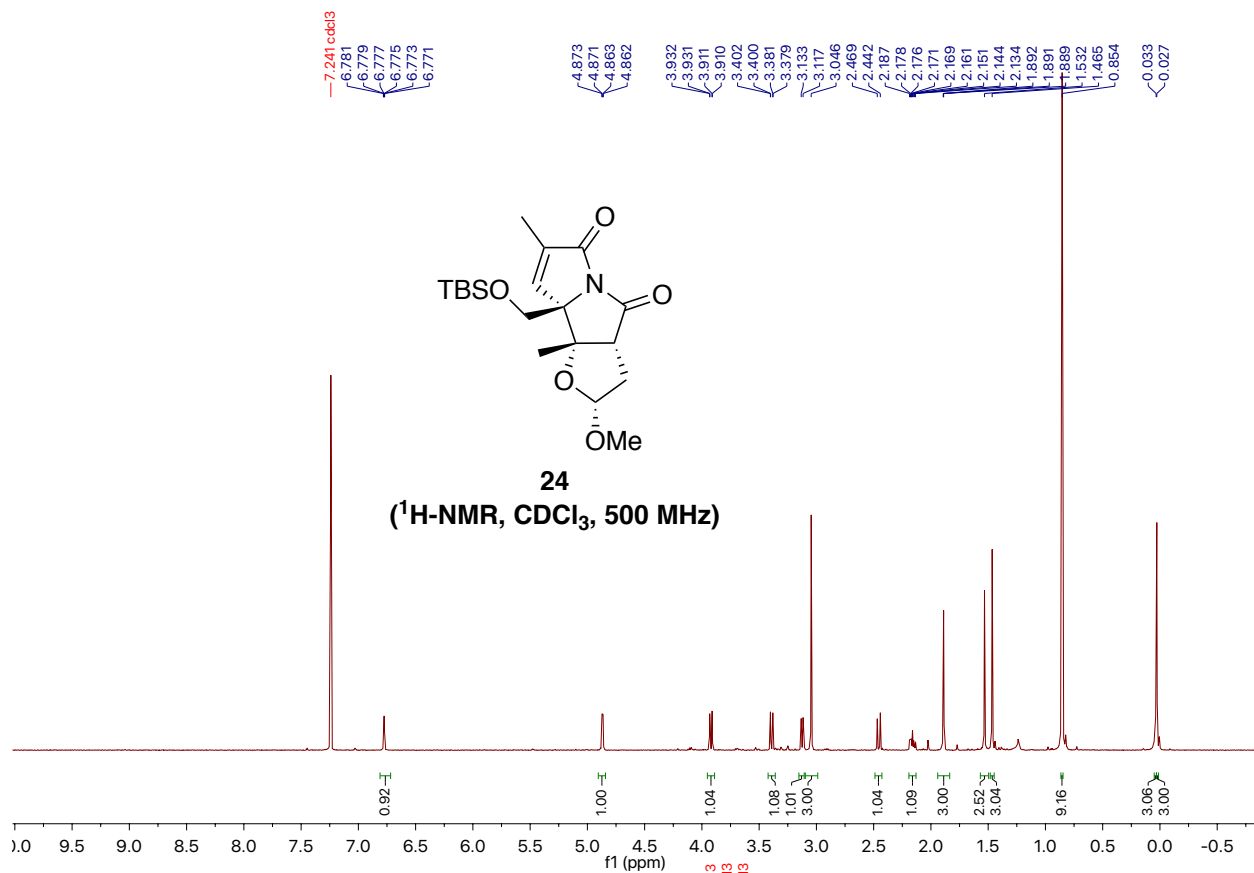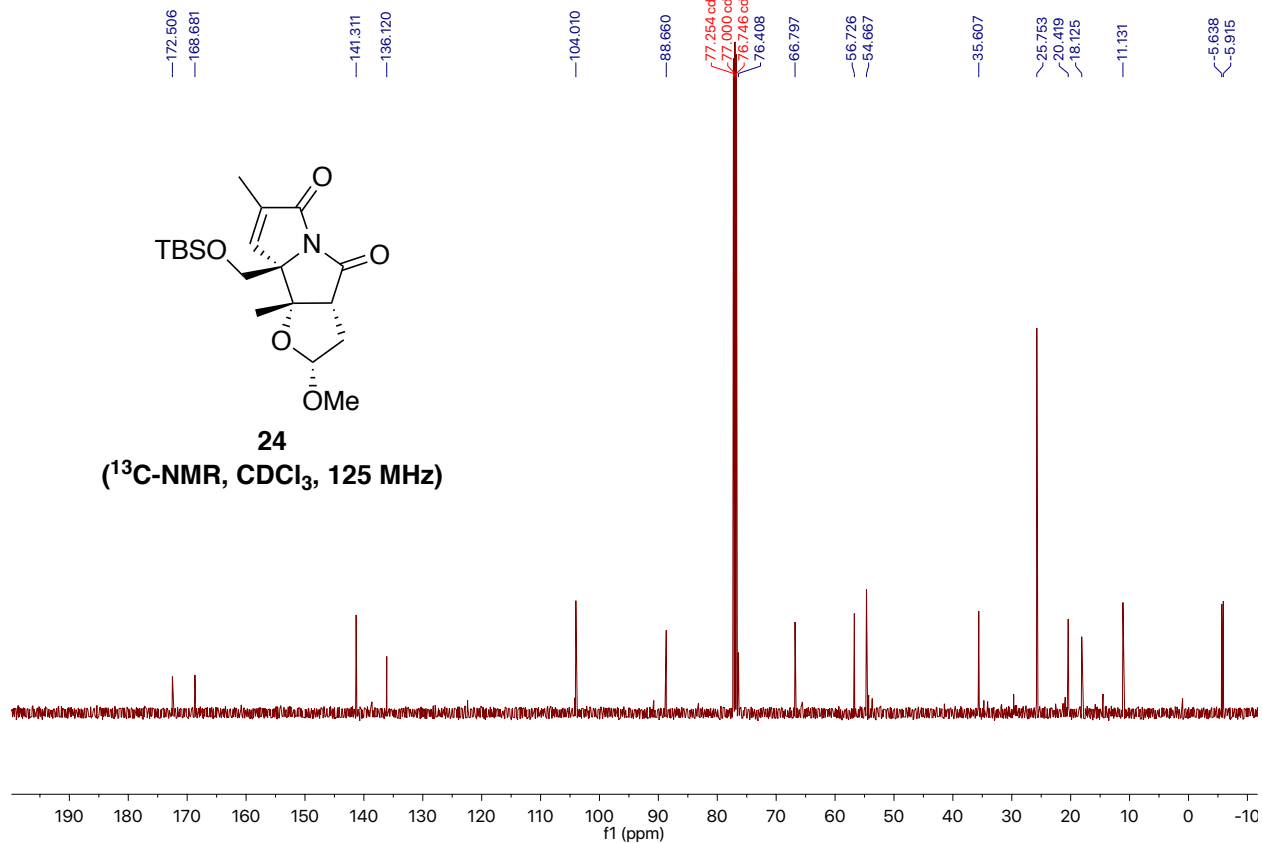

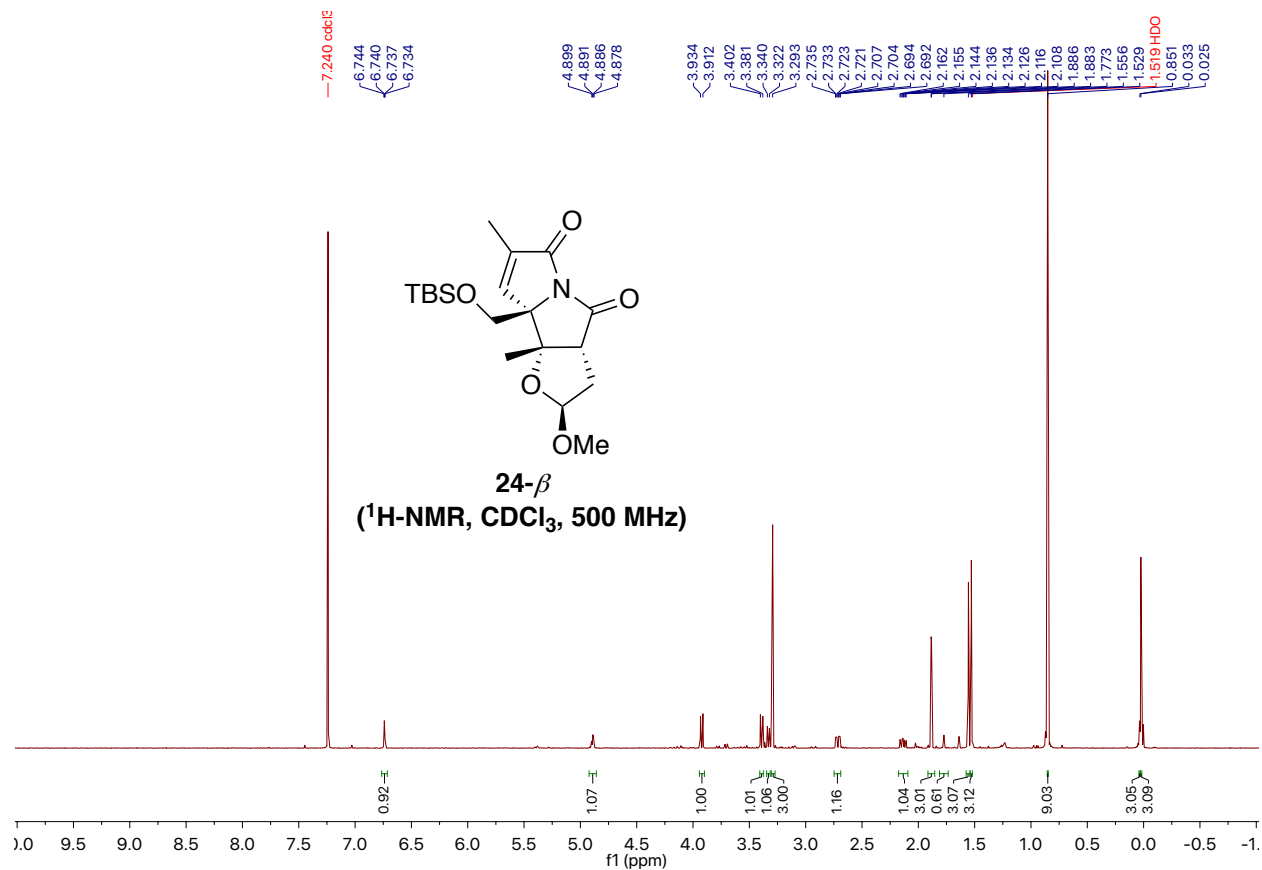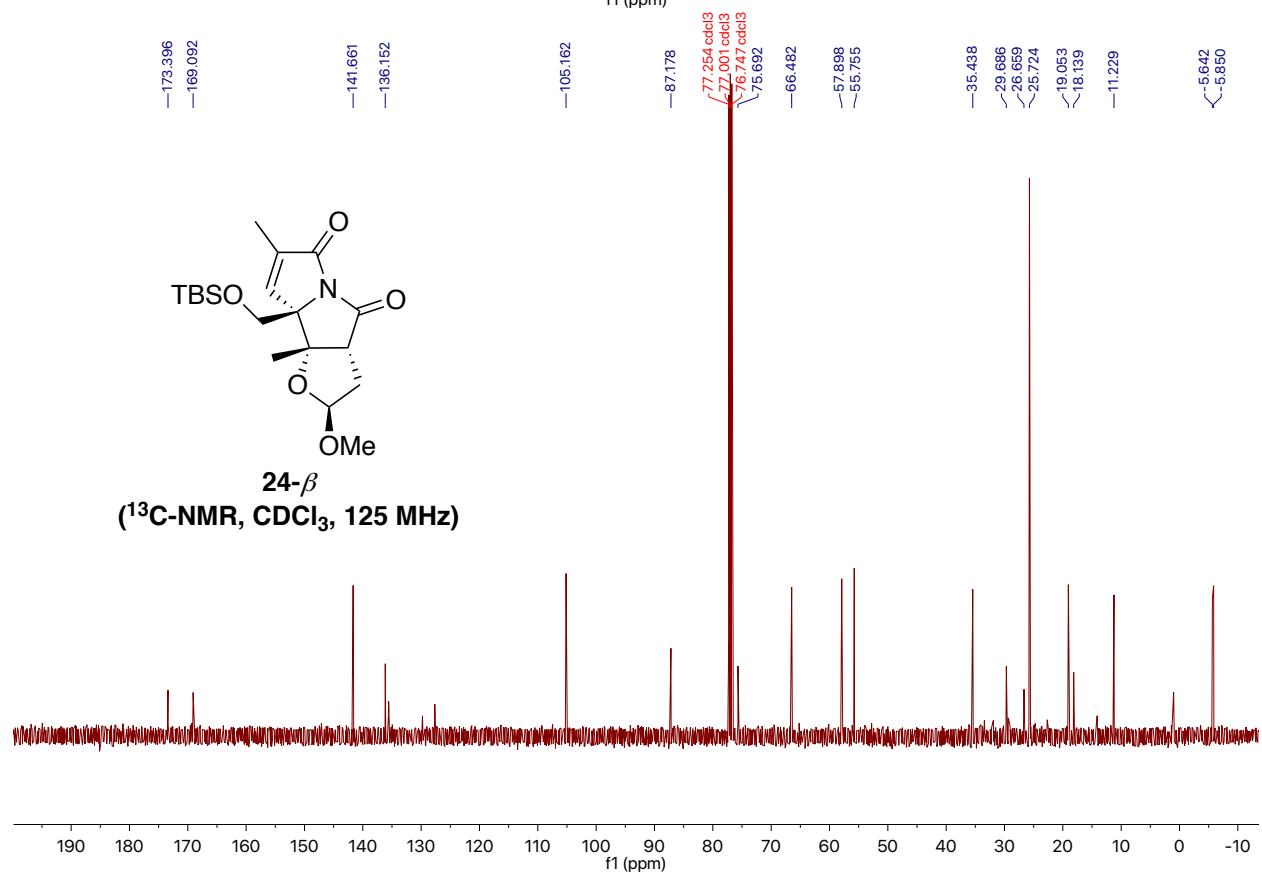

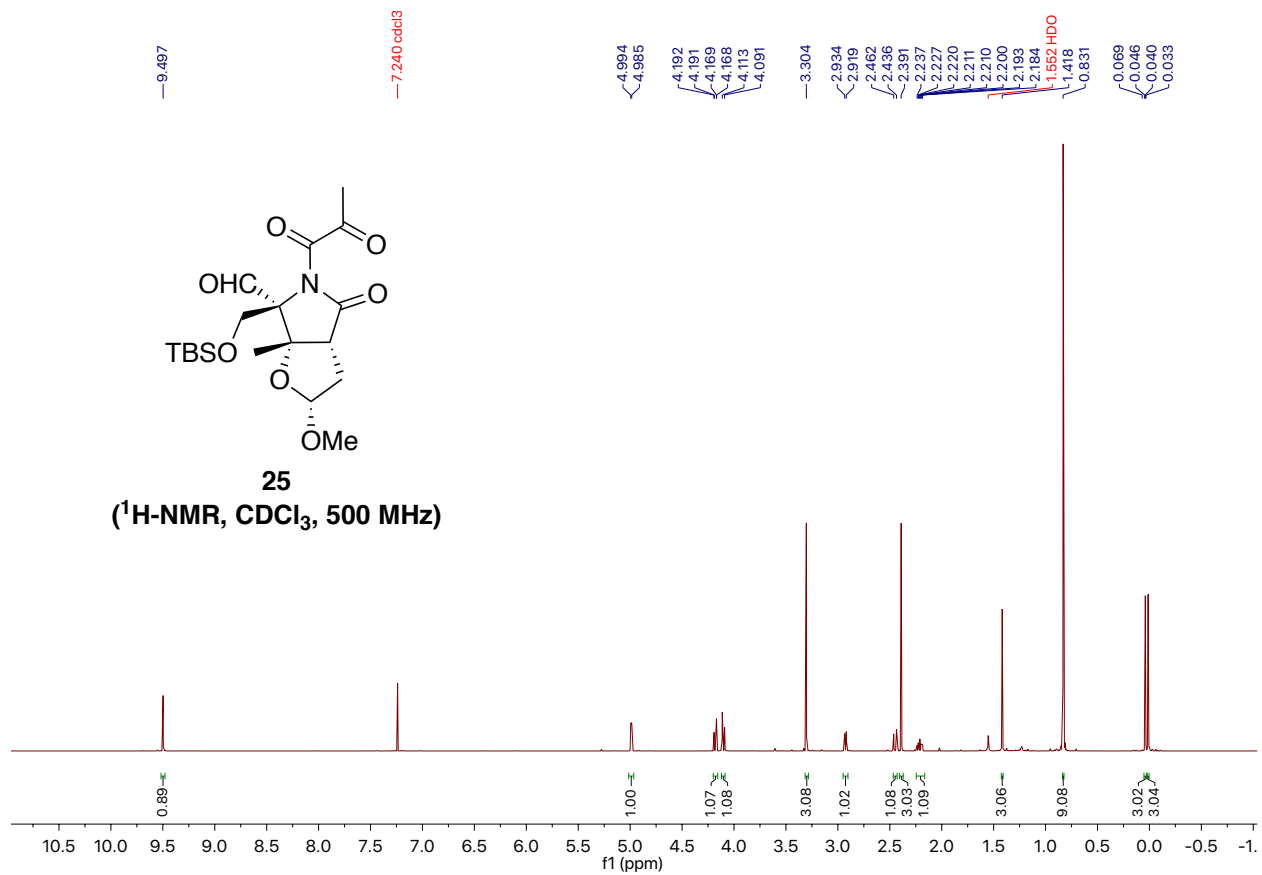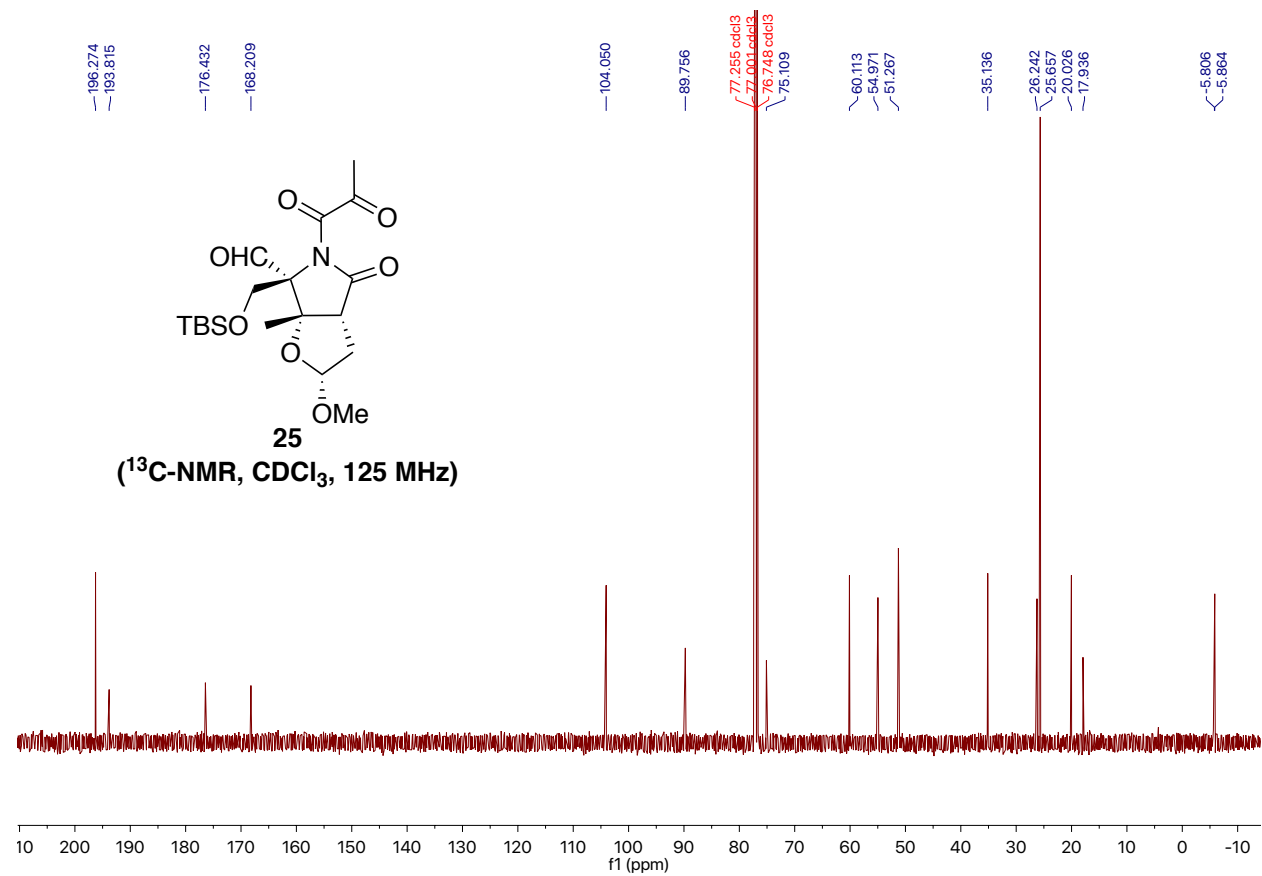

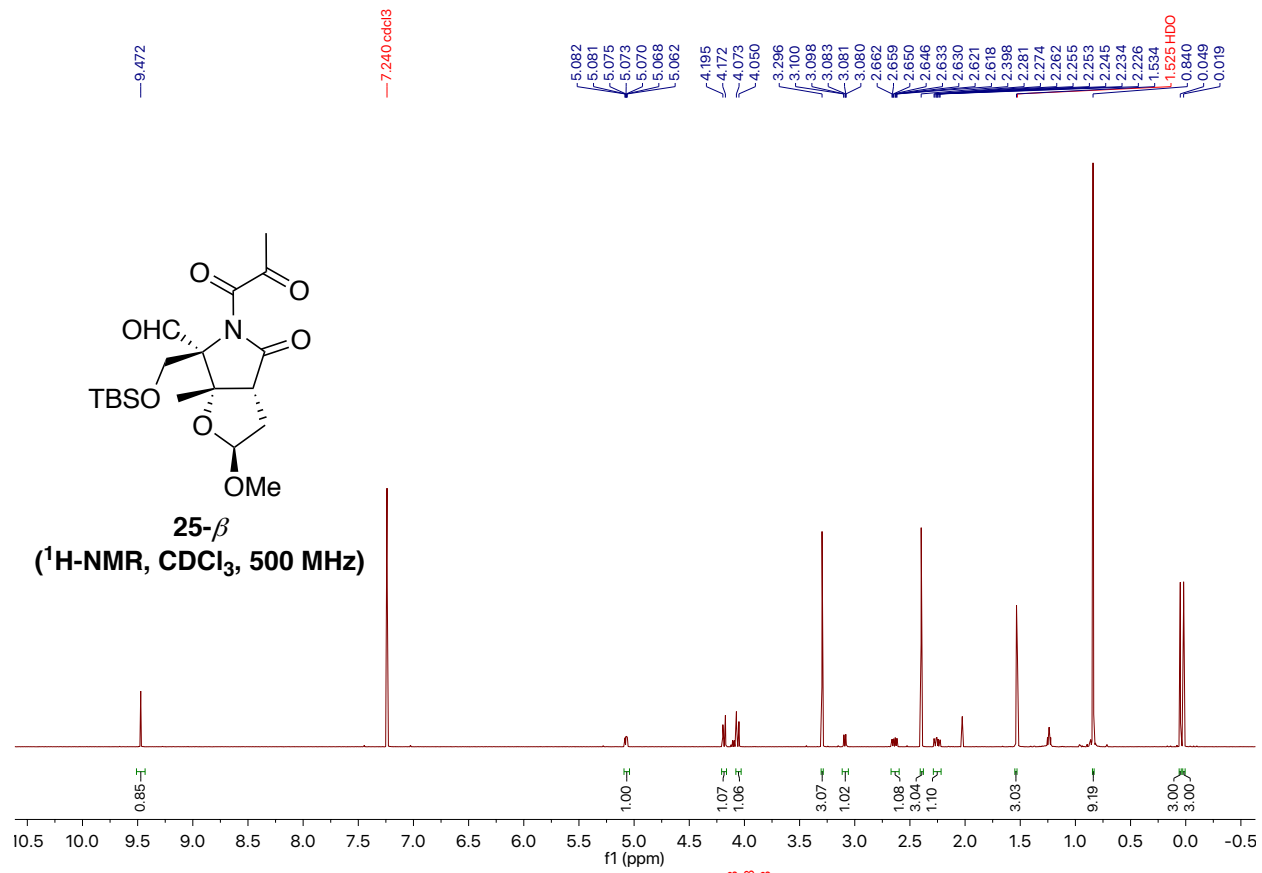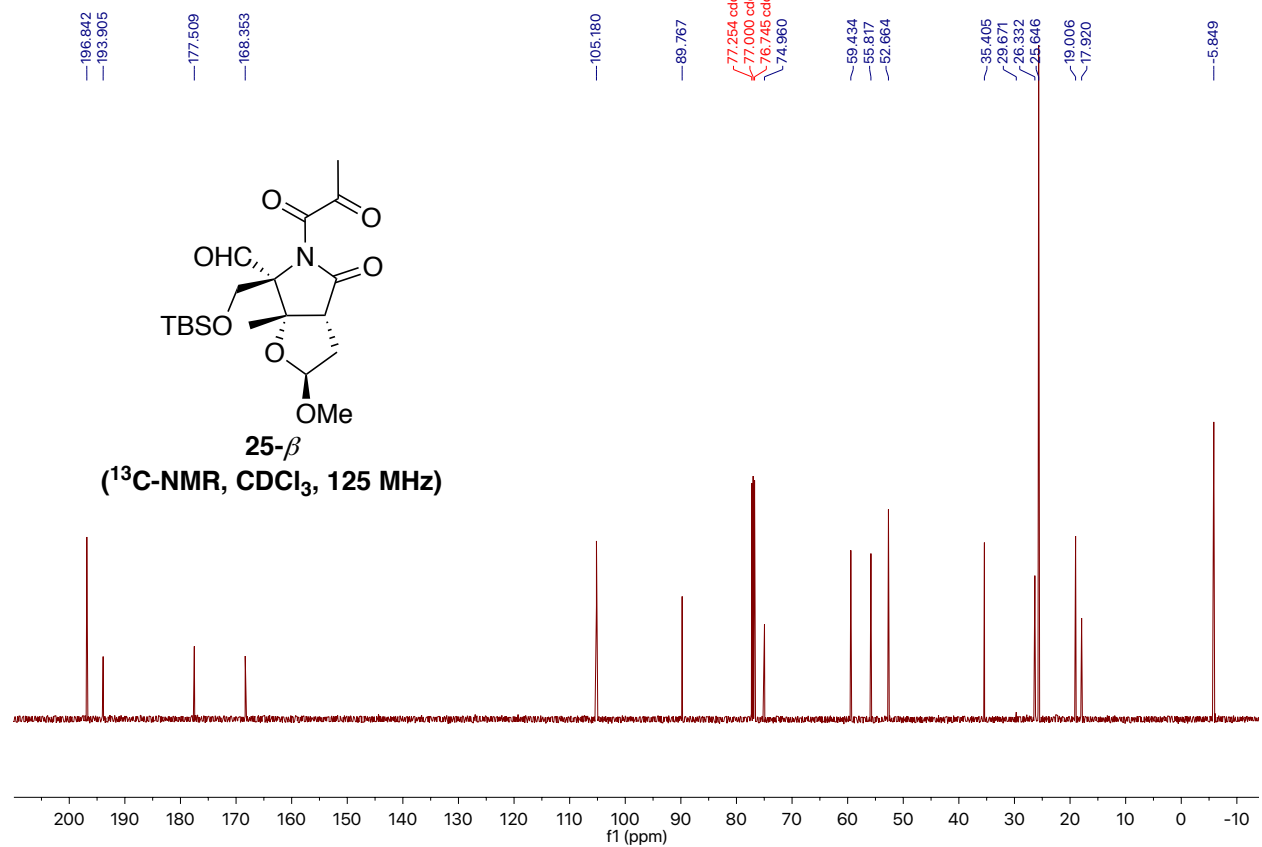

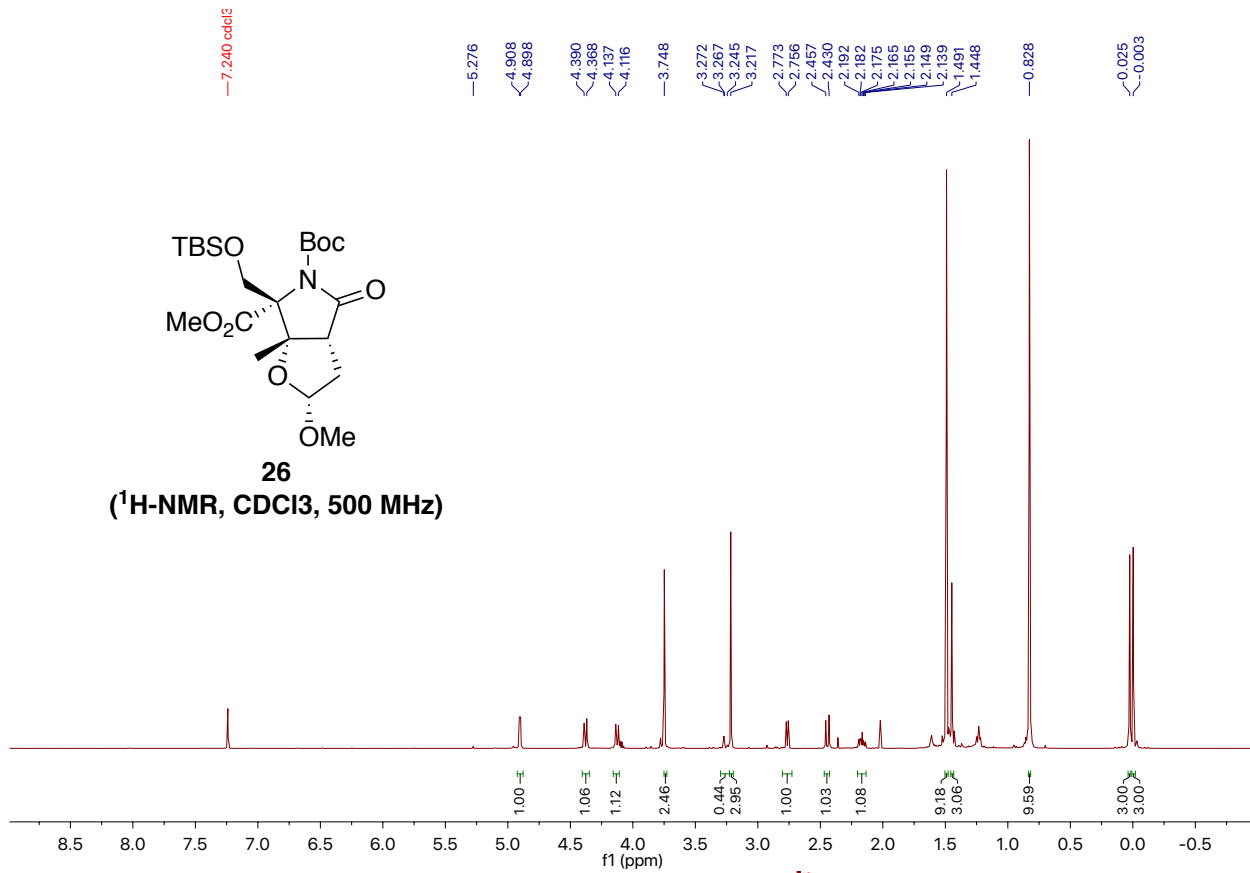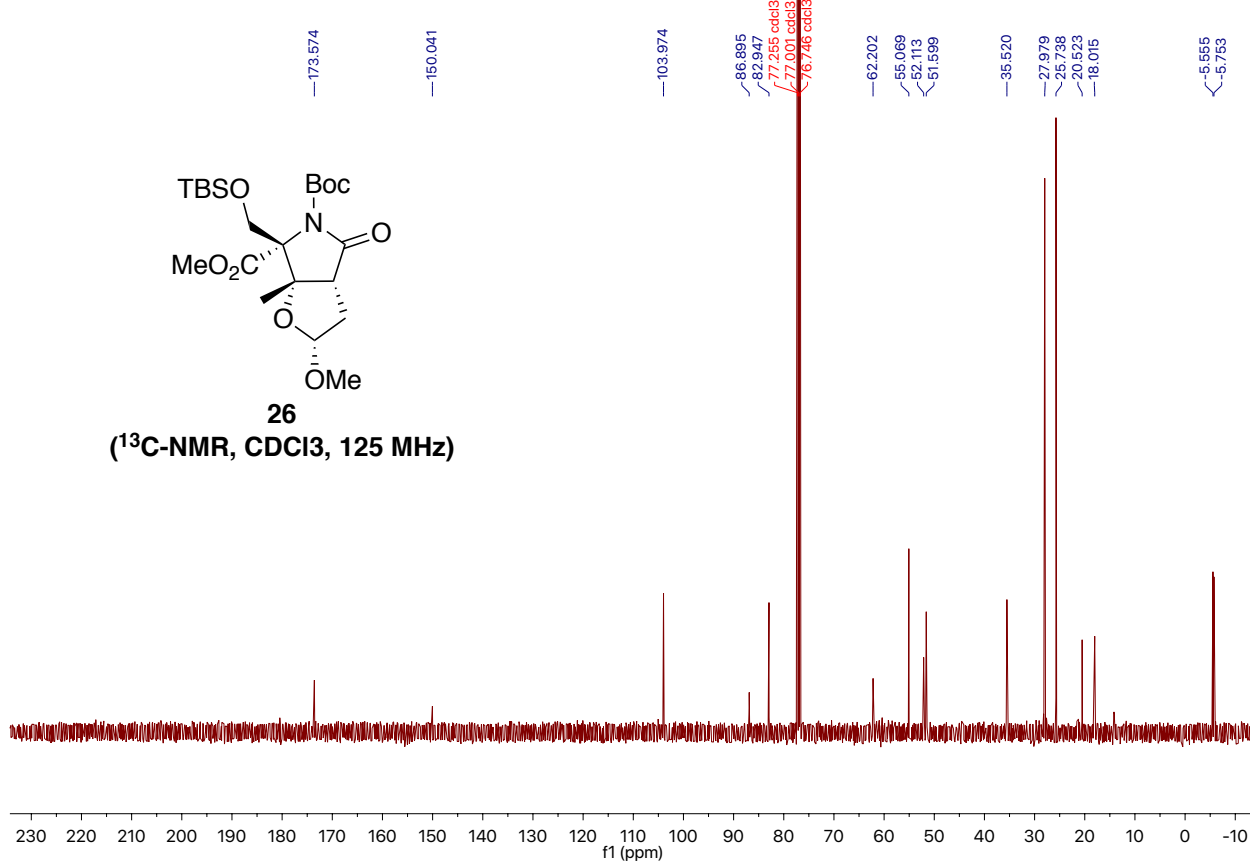

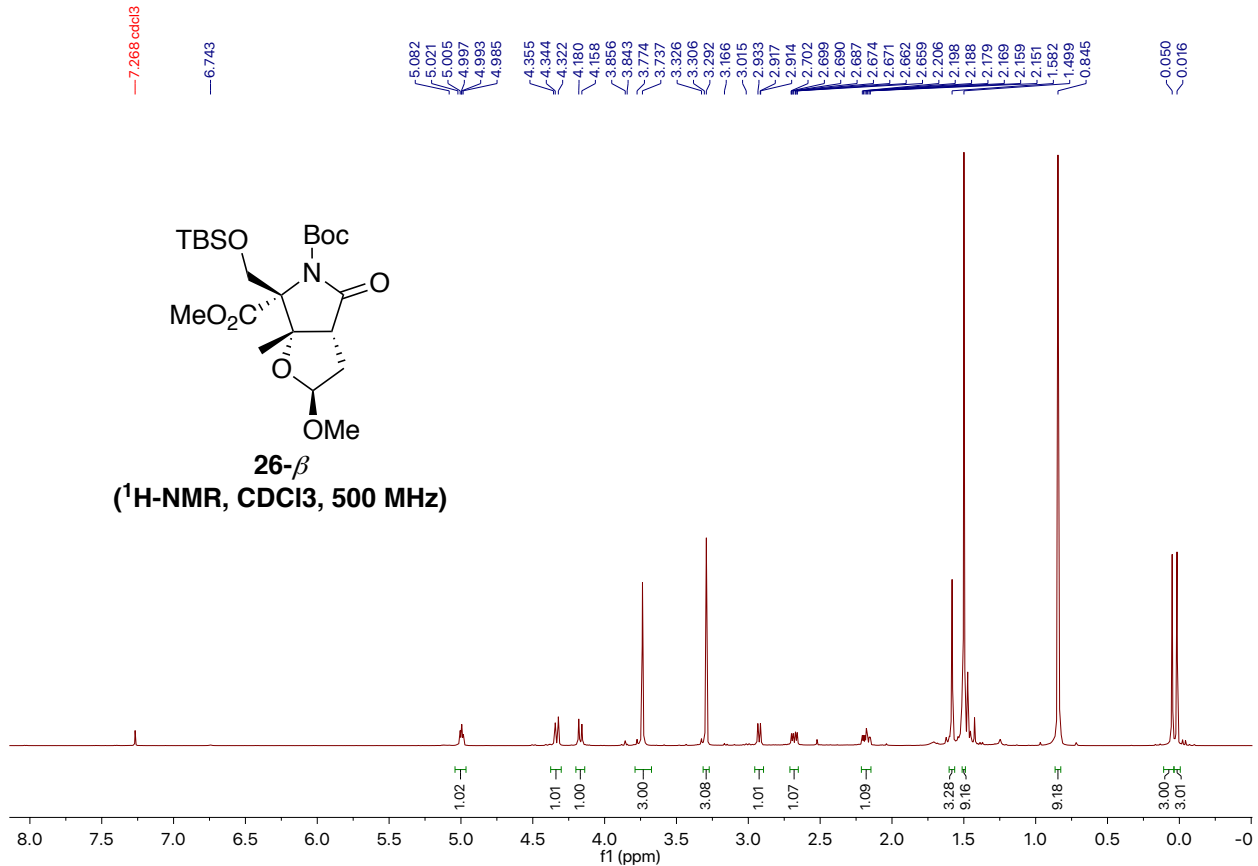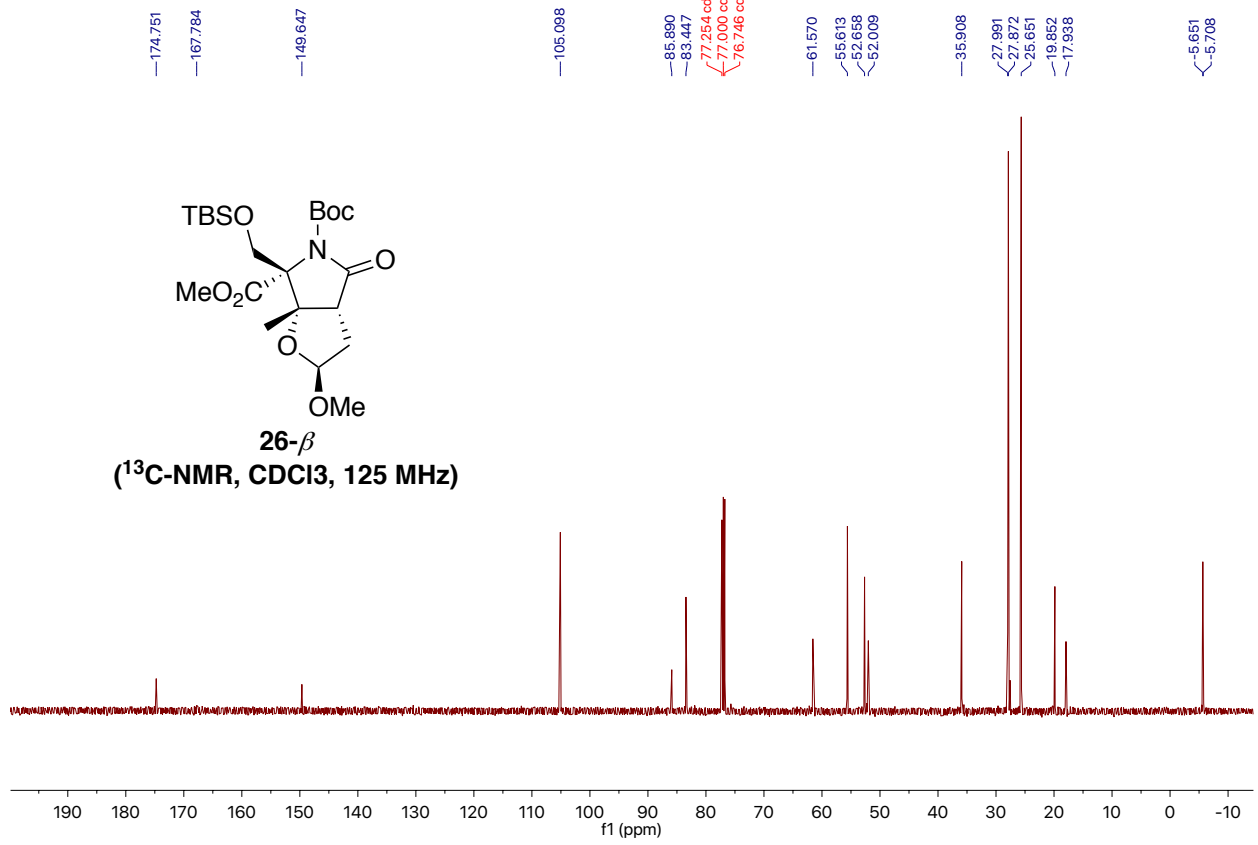

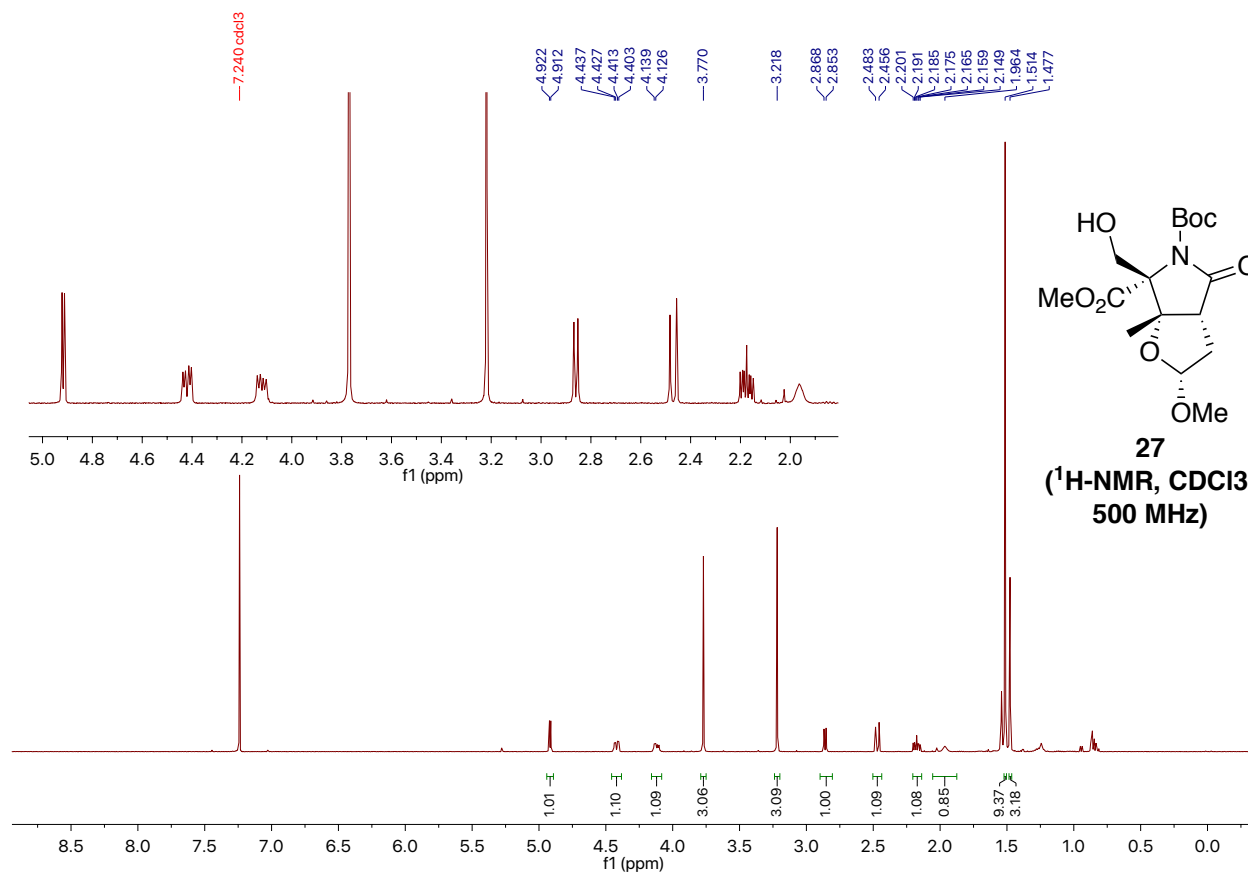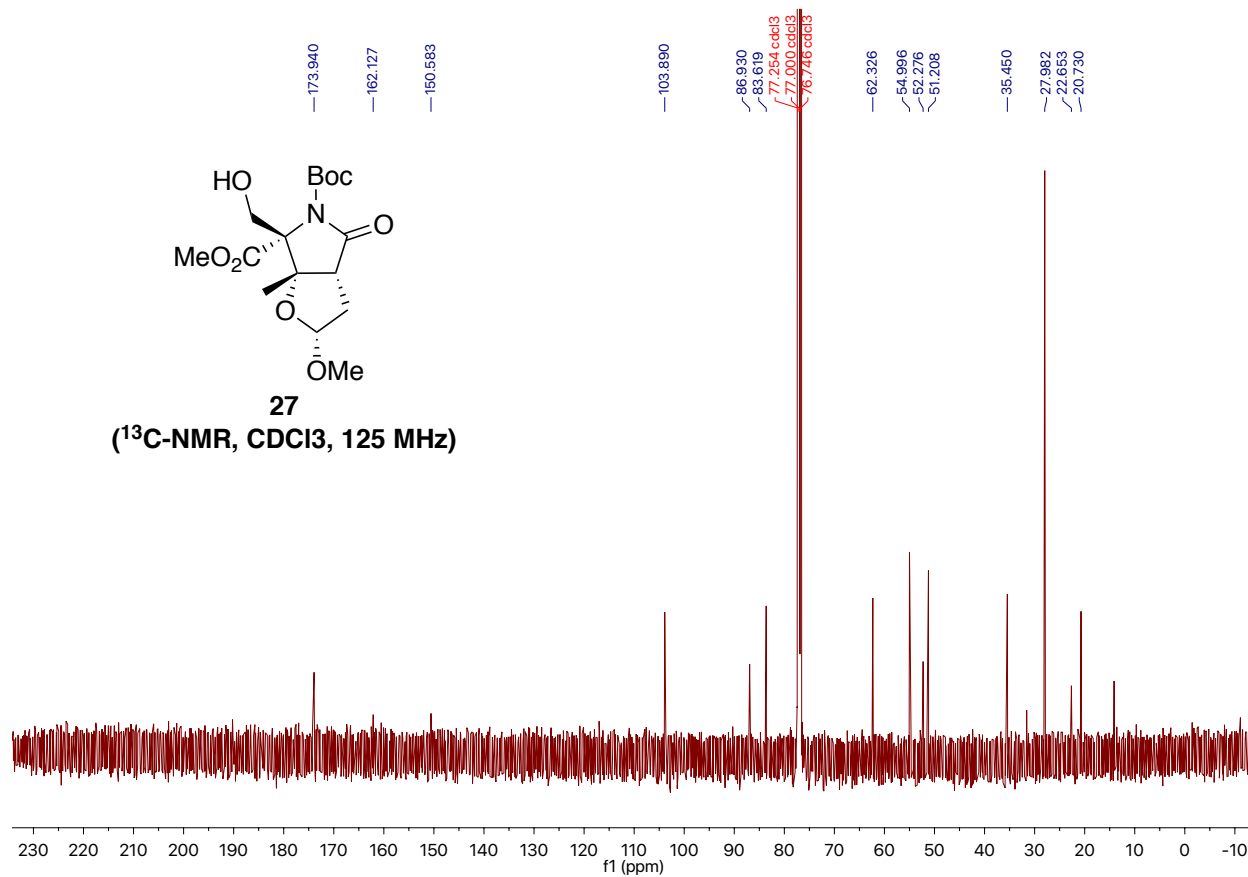



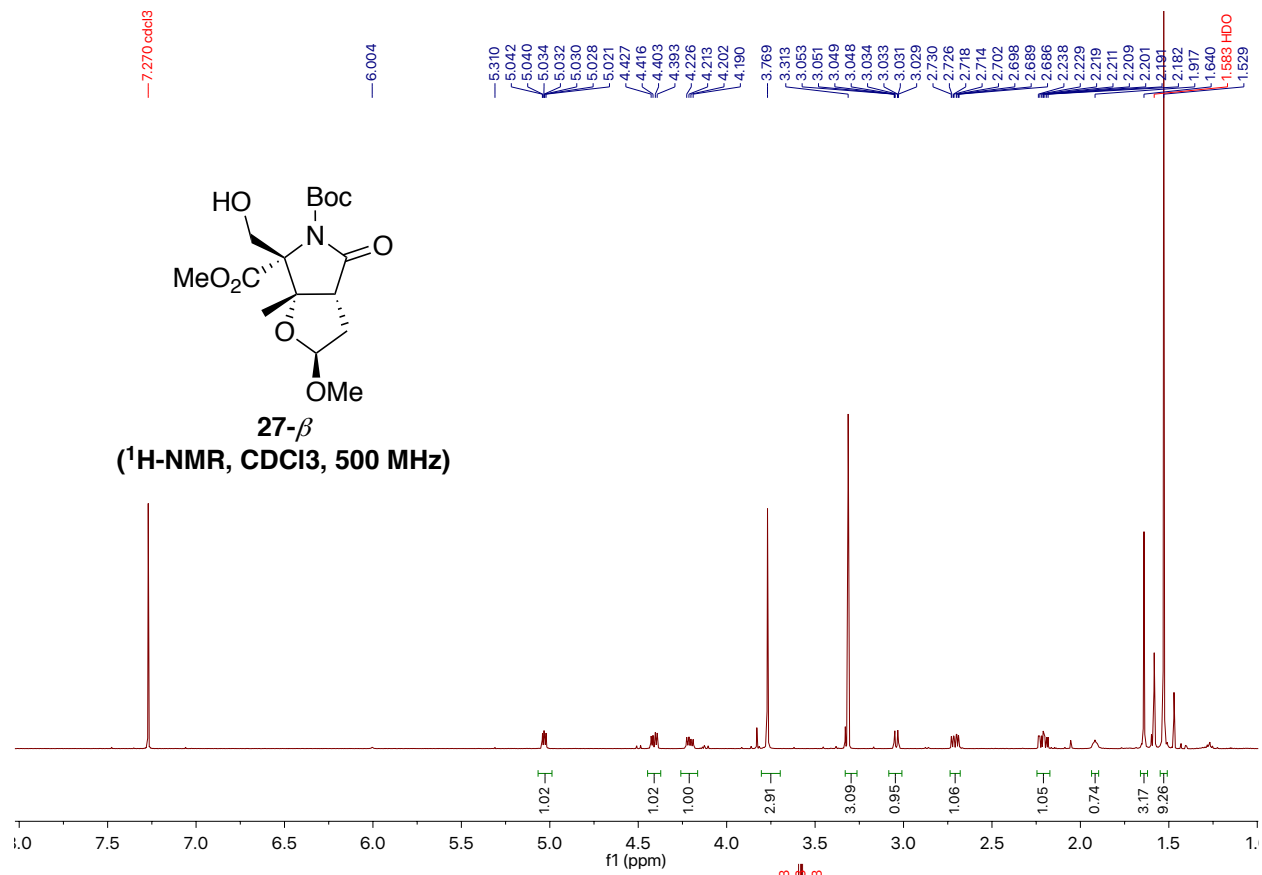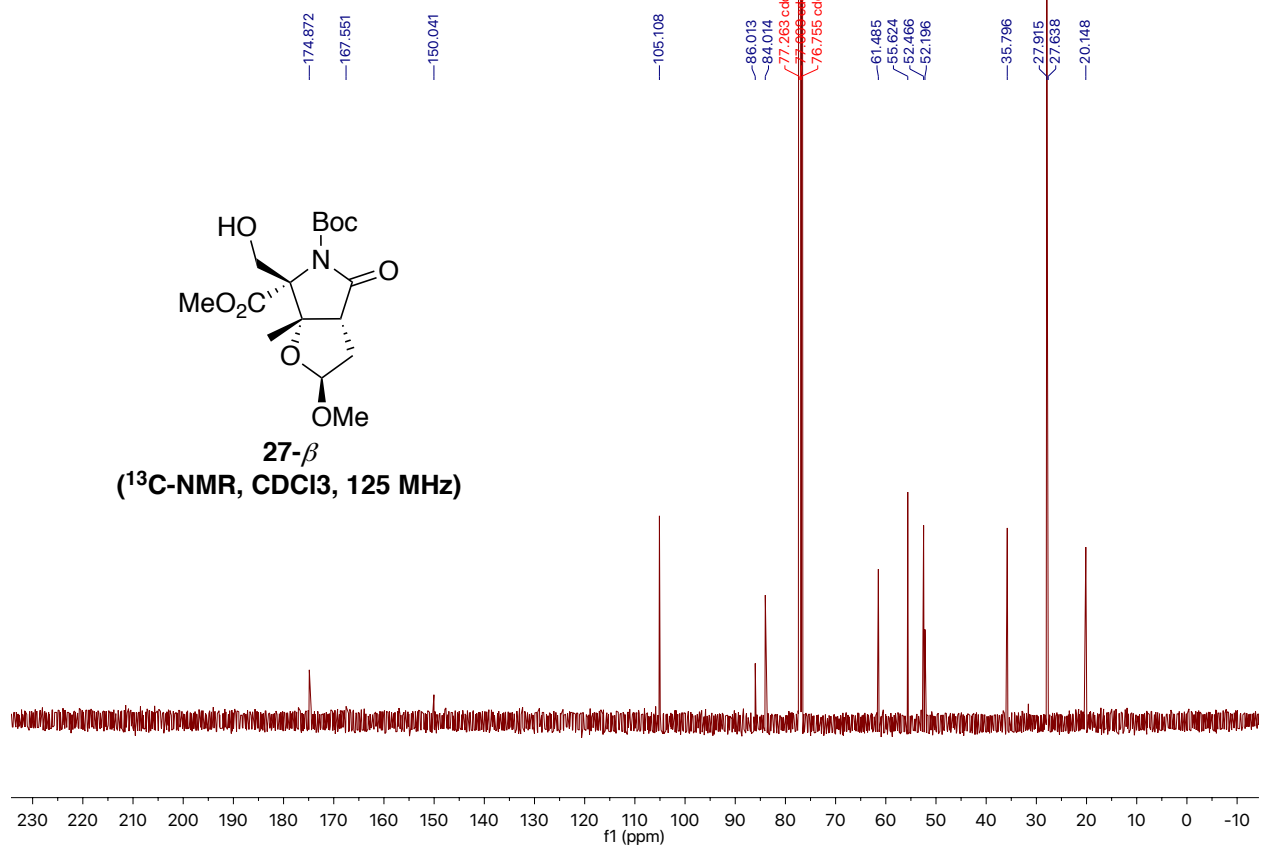

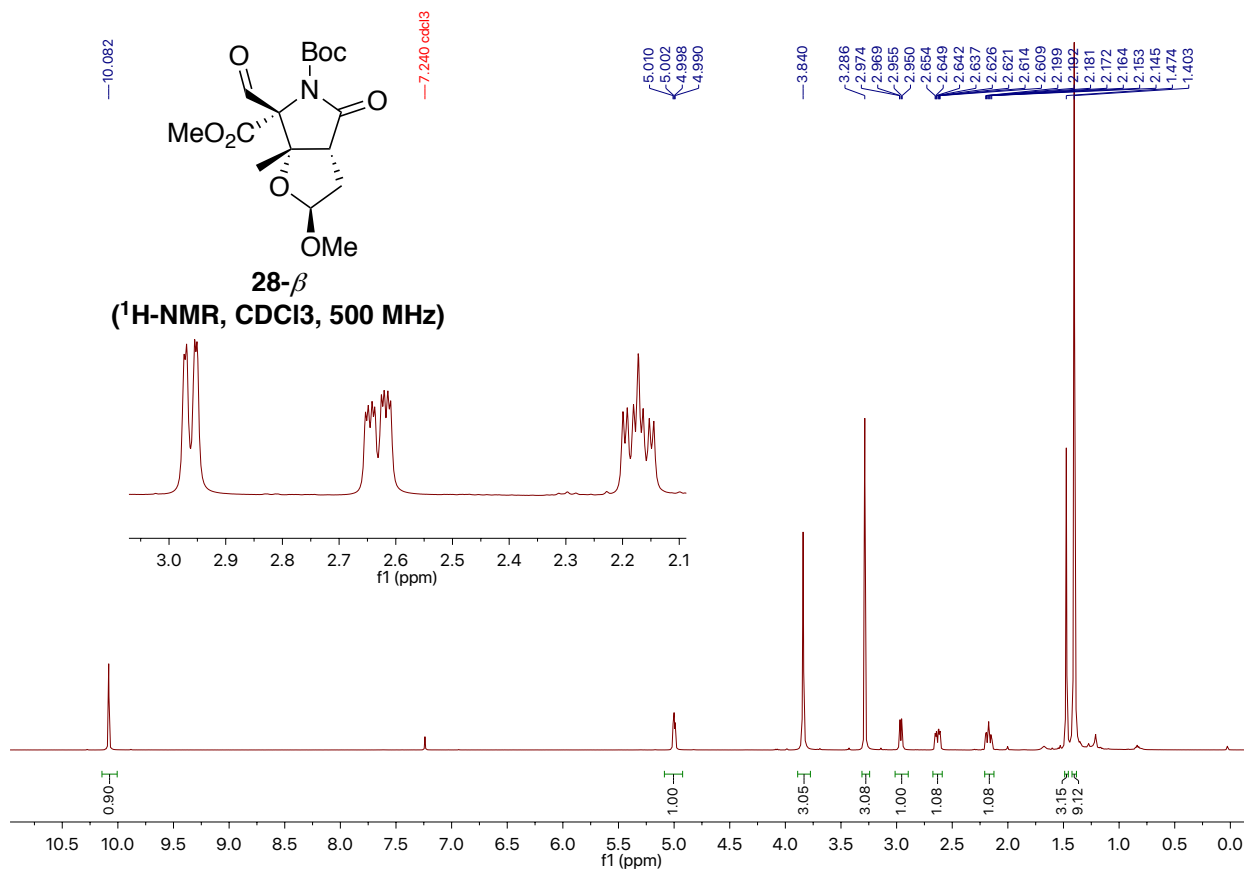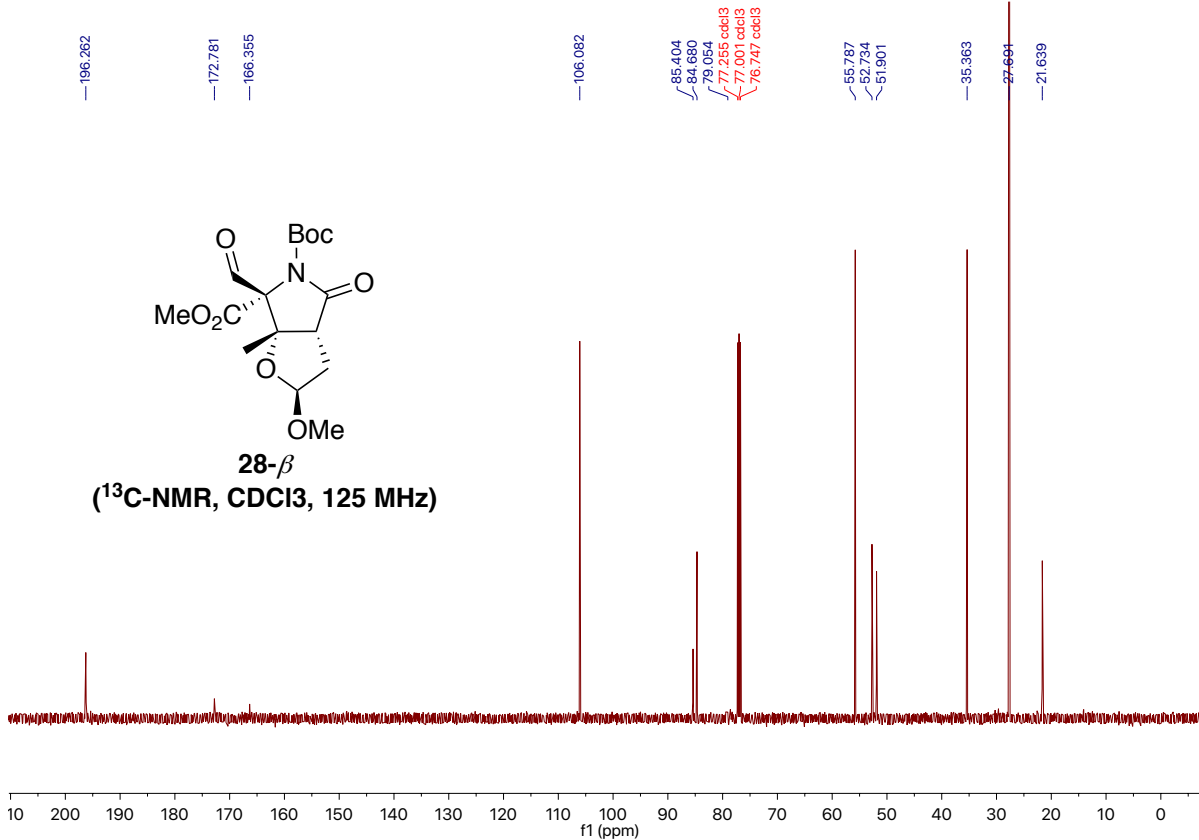

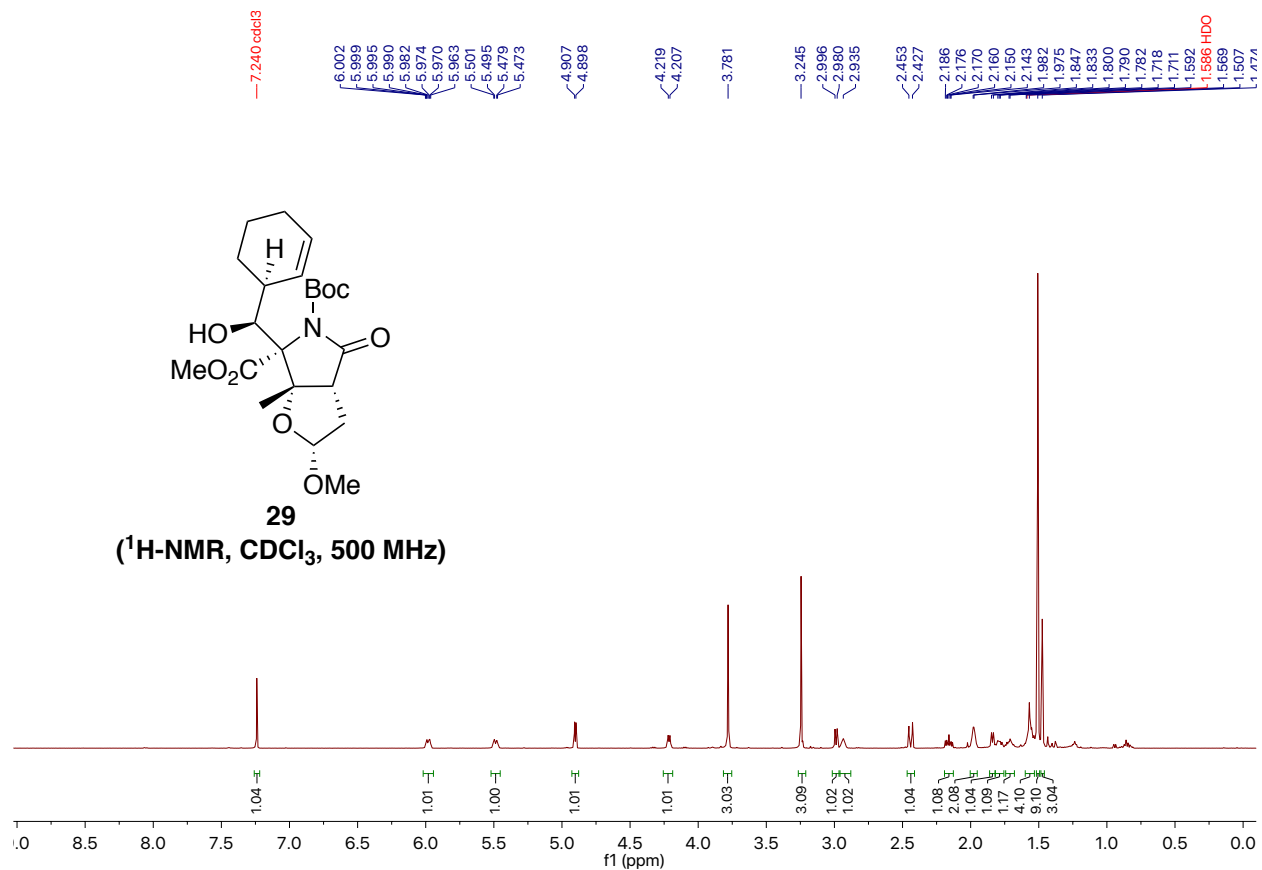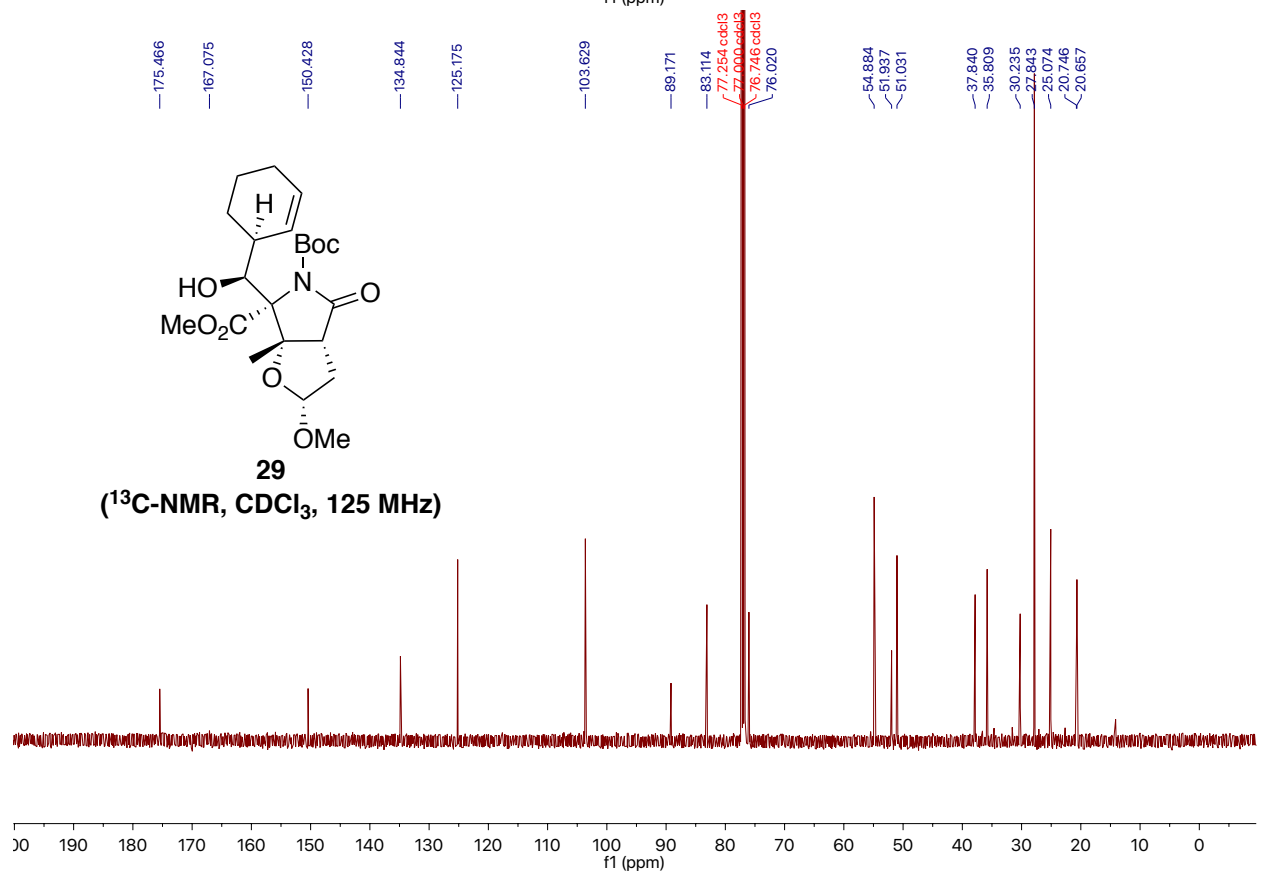

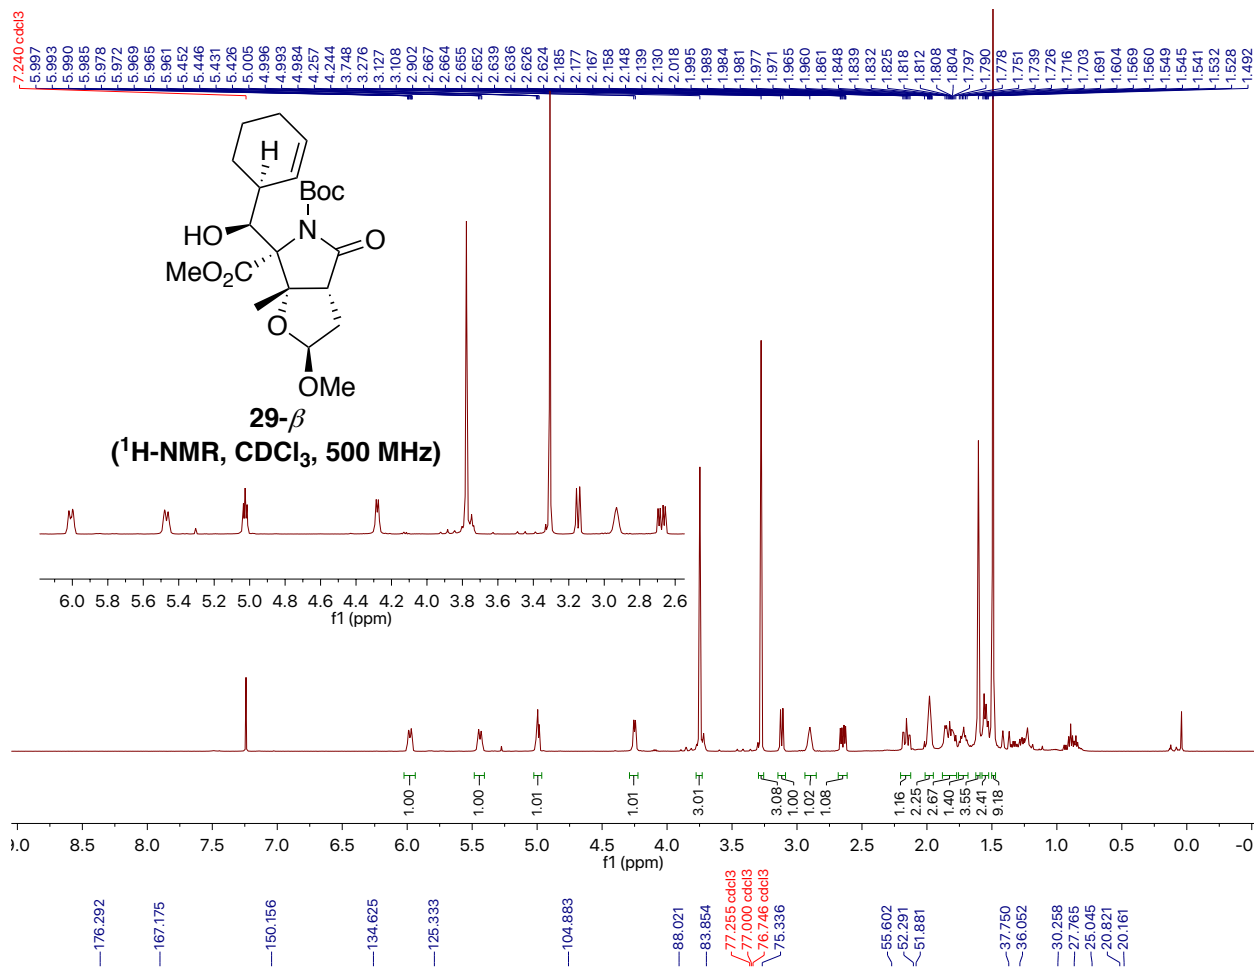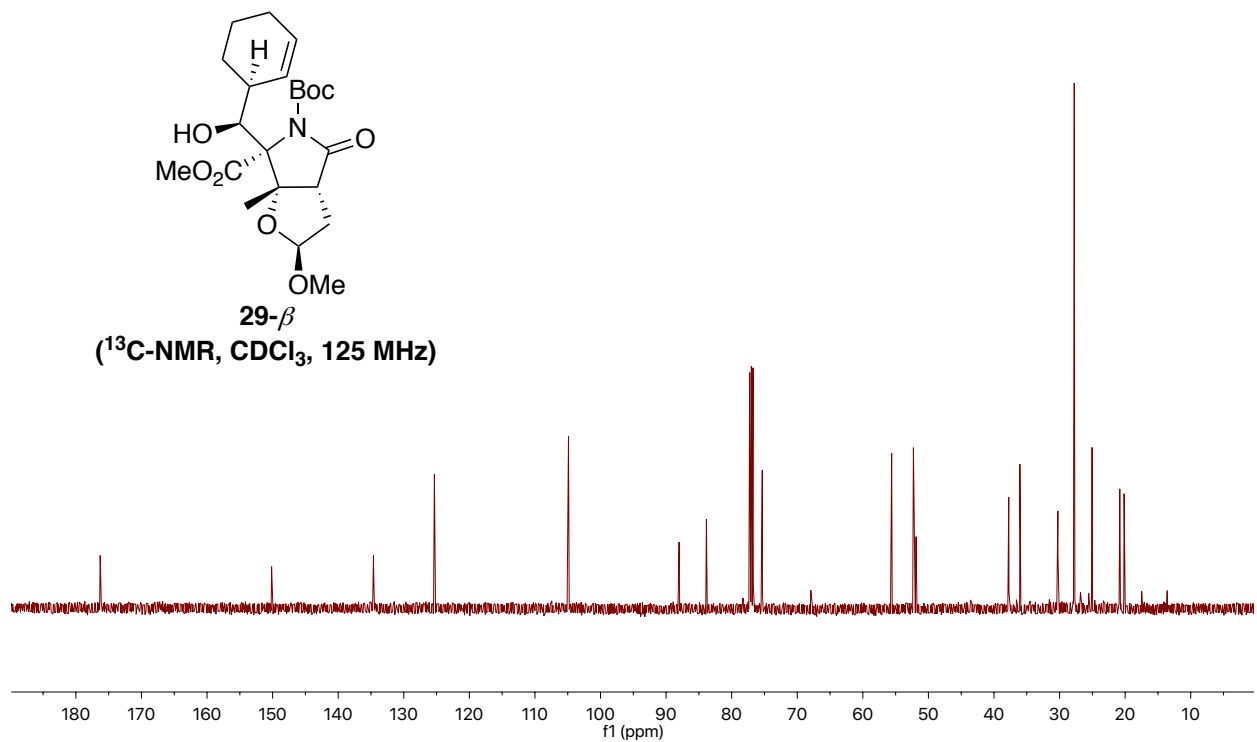

8.441  
7.240 cdcl3  
6.074  
6.070  
6.066  
6.058  
6.049  
6.046  
6.042  
5.753  
5.749  
5.745  
5.742  
5.738  
5.733  
5.728  
5.725  
5.721  
4.116  
4.113  
4.107  
3.811  
3.796  
3.791  
3.778  
3.771  
3.766  
3.714  
3.706  
3.696  
3.688  
2.821  
2.802  
2.799  
2.199  
2.193  
2.187  
2.181  
2.175  
2.168  
2.070  
2.060  
2.051  
2.051  
2.045  
2.037  
2.037  
2.019  
2.000  
1.994  
1.988  
1.980  
1.969  
1.943  
1.792  
1.783  
1.778  
1.768  
1.758  
1.754  
1.746  
1.737  
1.734  
1.724  
1.714  
1.708  
1.702  
1.697  
1.686  
1.591  
1.586  
1.577  
1.573  
1.566  
1.553  
1.527

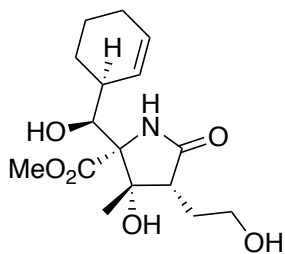

**30**  
**(<sup>1</sup>H-NMR, CDCl<sub>3</sub>, 500 MHz)**

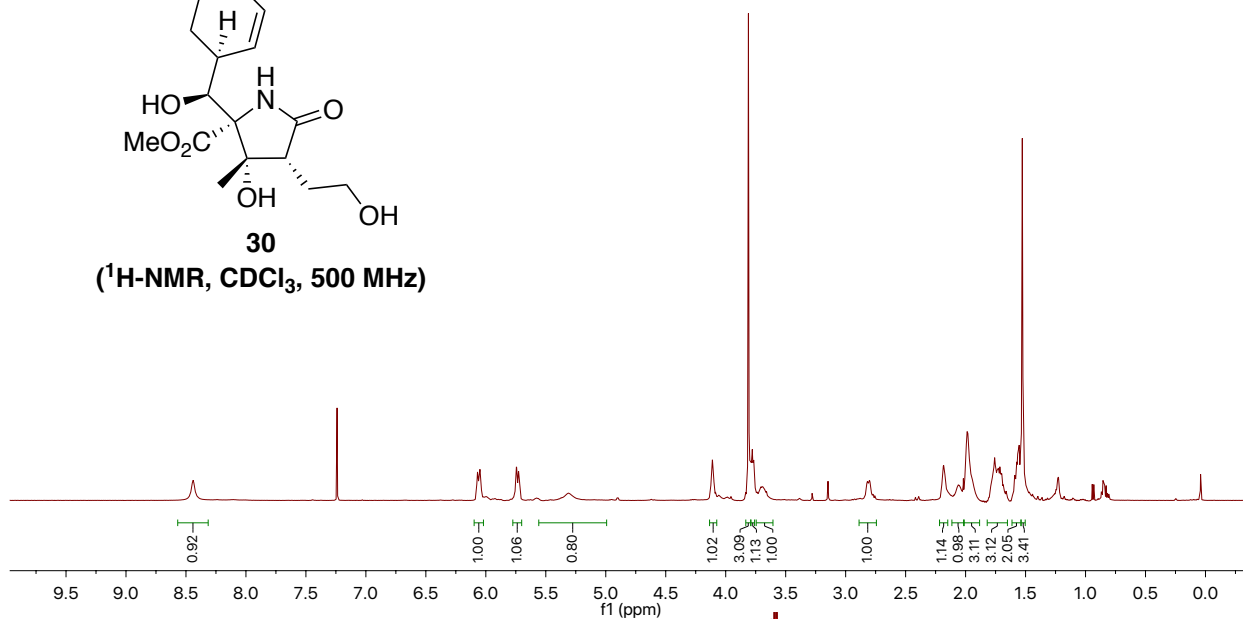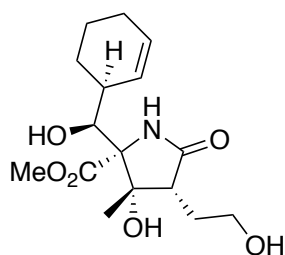

**30**  
**(<sup>13</sup>C-NMR, CDCl<sub>3</sub>, 125 MHz)**

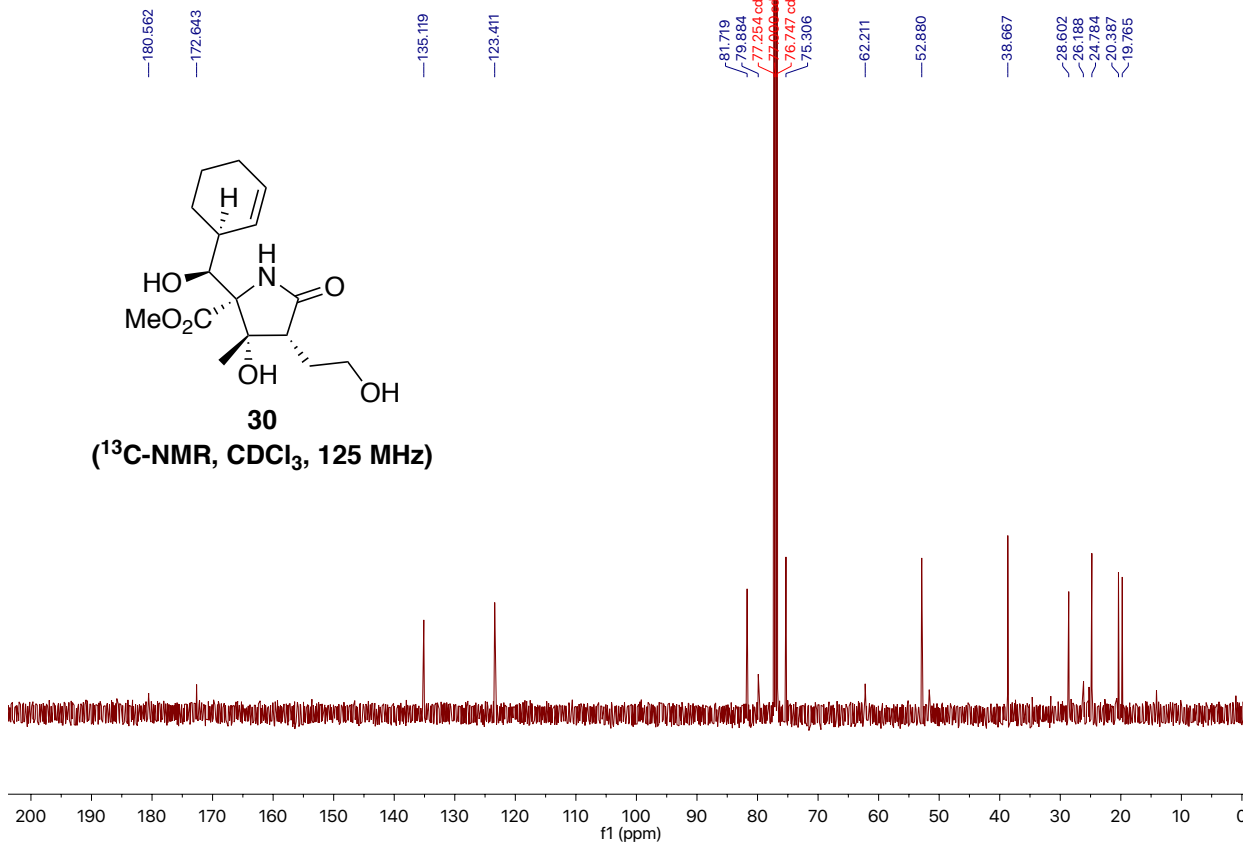

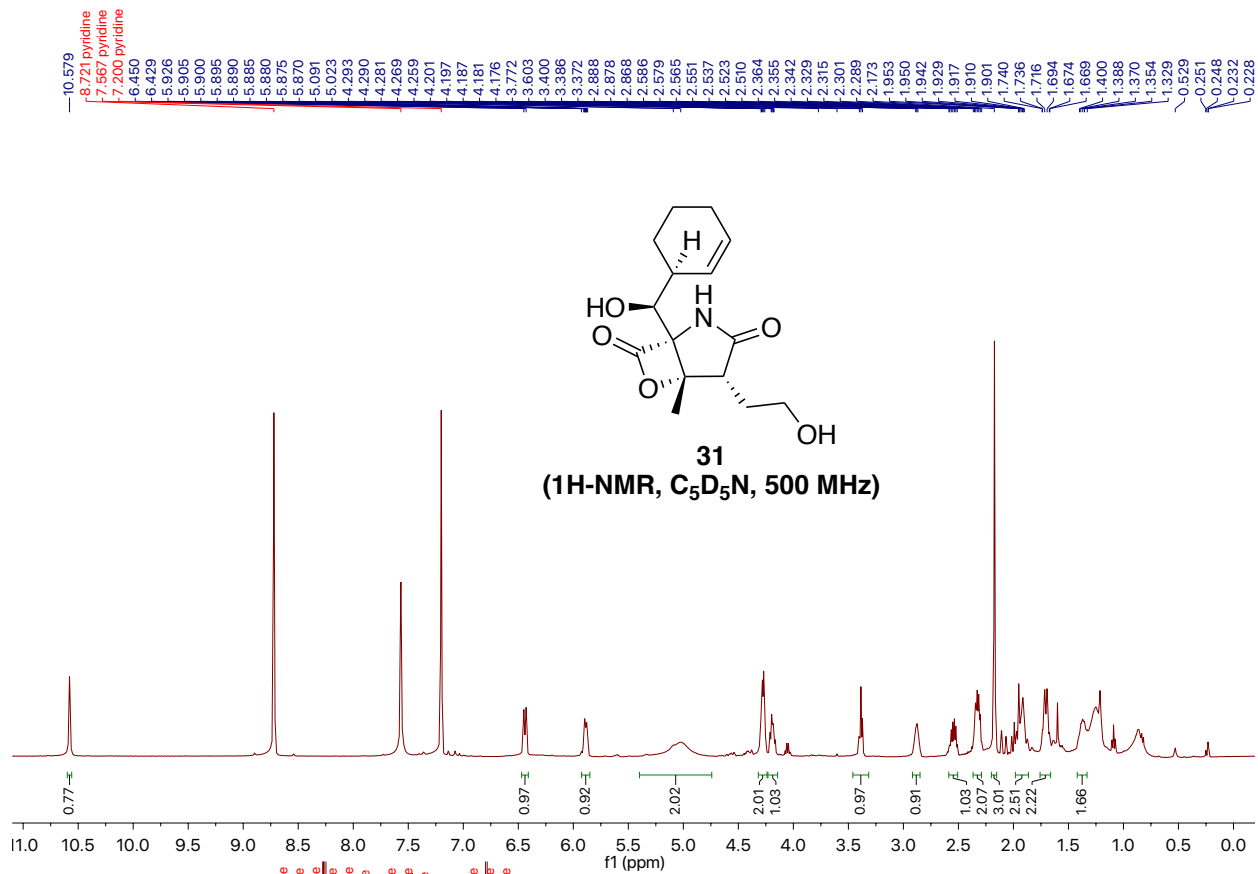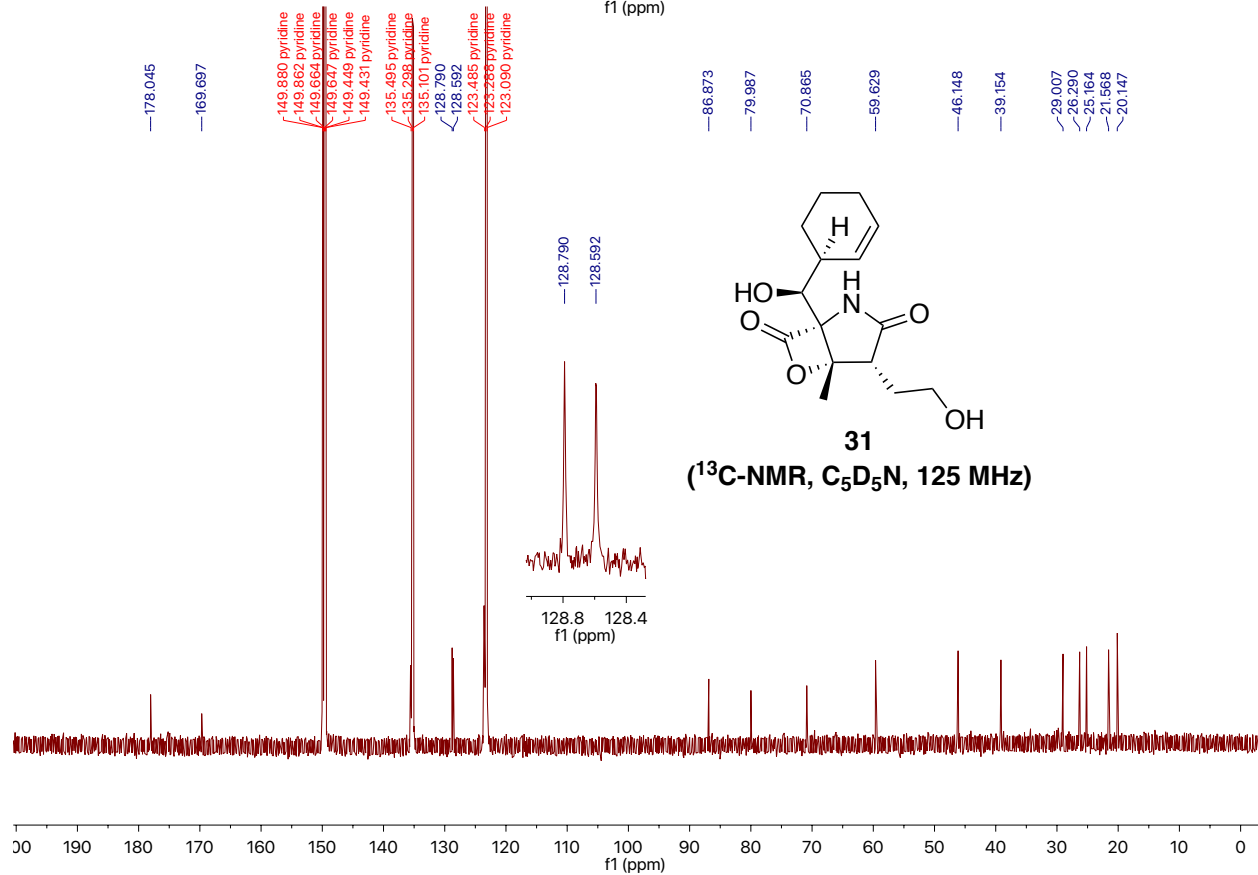

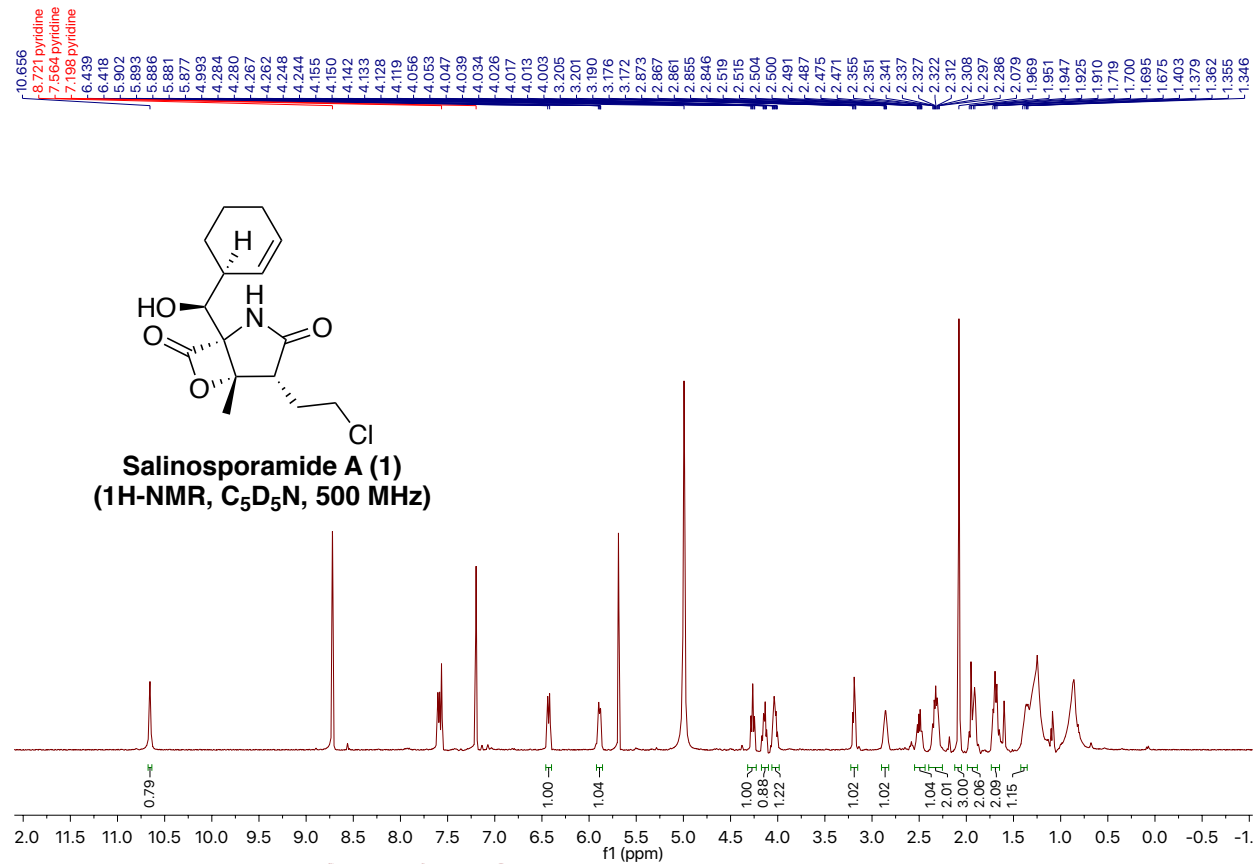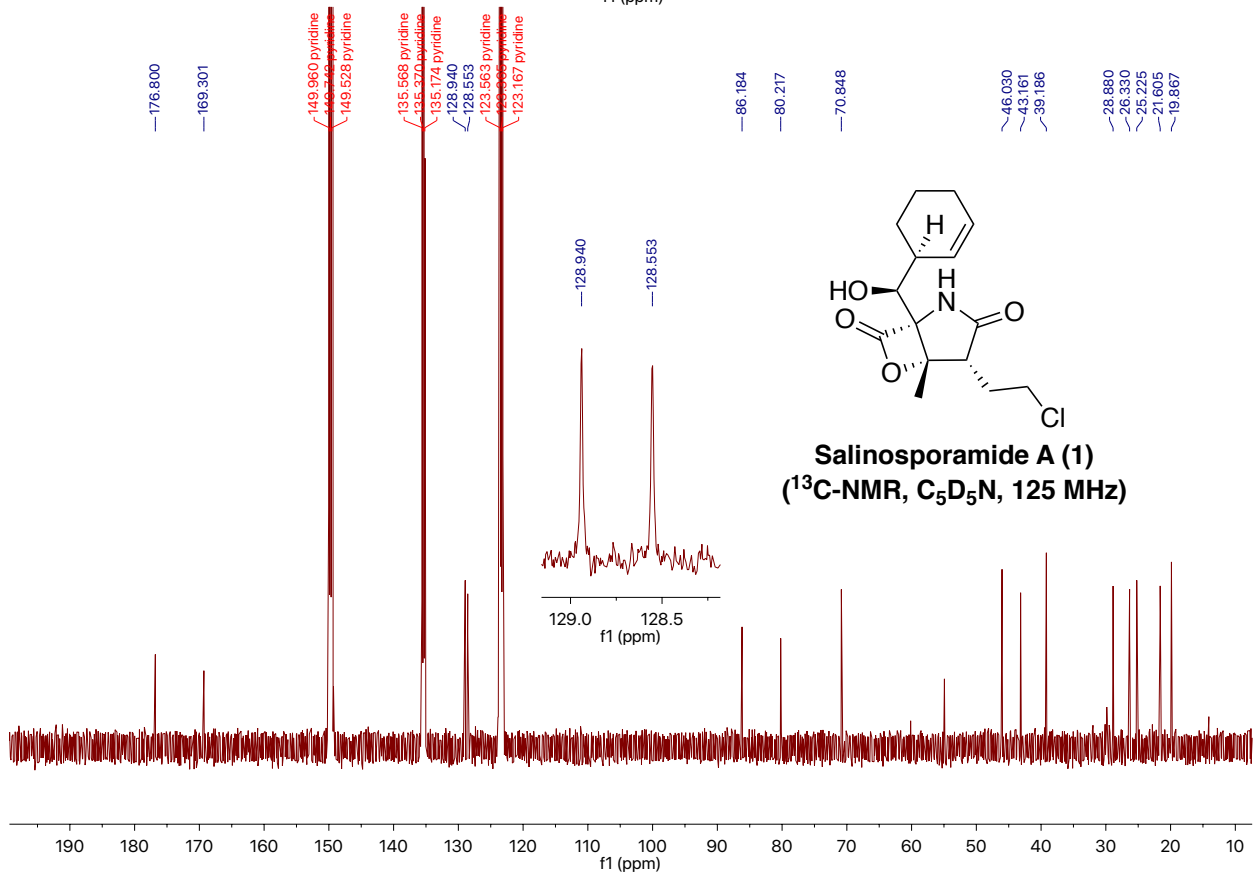

## References:

- (1) Deiana, L.; Dziedzic, P.; Zhao, G. L.; Vesely, J.; Ibrahim, I.; Rios, R.; Sun, J. L.; Cordova, A. Catalytic Asymmetric Aziridination of  $\alpha,\beta$ -Unsaturated Aldehydes. *Chem. Eur. J.* **2011**, *17*, 7904.
- (2) Campbell, N. E.; Sammis, G. M. Single-Electron/Pericyclic Cascade for the Synthesis of Dienes. *Angew. Chem. Int. Ed.* **2014**, *53*, 6228.
- (3) Mycock, D. K.; Glossop, P. A.; Lewis, W.; Hayes, C. J. A formal synthesis of (+)-lactacystin from 4-hydroxyproline. *Tetrahedron Lett.* **2013**, *54*, 55.
- (4) (a) Reddy, L. R.; Saravanan, P.; Corey, E. J. A simple stereocontrolled synthesis of salinosporamide A. *J. Am. Chem. Soc.* **2004**, *126*, 6230; (b) Satoh, N.; Yokoshima, S.; Fukuyama, T. Total Synthesis of (-)-Salinosporamide A. *Org. Lett.* **2011**, *13*, 3028.
- (5) Reddy, L. R.; Fournier, J. F.; Reddy, B. V. S.; Corey, E. J. New synthetic route for the enantioselective total synthesis of salinosporamide A and biologically active analogues. *Org. Lett.* **2005**, *7*, 2699.
- (6) Dolomanov, O. V.; Bourhis, L. J.; Gildea, R. J.; Howard, J. A. K.; Puschmann, H. OLEX2: a complete structure solution, refinement and analysis program. *J. Appl. Crystallogr.* **2009**, *42*, 339.
- (7) Software for the CCD Detector Systems for Determining Data Collection Parameters, Bruker axs, Madison, WI (2000).
- (8) Software for the Integration of CCD Detector System Bruker Analytical X-ray Systems, Bruker axs, Madison, WI, after 2013.
- (9) Sheldrick, G. M. A short history of SHELX. *Acta Crystallogr A* **2008**, *64*, 112.
